# Supplementary material for: Error in jump height estimation using the flight time method: simulation of the effect of ankle position between takeoff and landing
Source: PeerJ. 2024 Aug 30;12:e17704. doi: 10.7717/peerj.17704 (PMC11368081; doi:10.7717/peerj.17704)
Supplement: Data S1 [file peerj-12-17704-s001.xlsx]

## Sheet: Sheet1
	stature(m)	jumpHeight(m)	dorsiFlexJump(°)	dorsiFlexLanding(°)	flexKnee(°)	flexHip(°)	heightCOMtakeoff(m)	heightCOMlanding(m)	ErrorMeasurementLanding(m)	flightTime(s)	estimatedFT(s)	error_FT(%)	estimatedJumpHeight(m)	erro_JumpHeight(%)	takeoffVelocity(m/s)	estimatedTakeoffVelocity(m/s)	errorVelocity(%)	vMedSquat(m/s)	estimatedVMedSquat(m/s)	errorVmedSquat(%)	he	correctedFT(s)	hCorrected(m)	COMx(m)
0	1.435	0.1	-40	-40	0	0	1.04446	1.04446	0	0.285569	0.285569	0	0.1	-1.38778e-14	1.40071	1.40071	0	0.700357	0.700357	0	0	0.285569	0.1	[-0.09463479]
1	1.435	0.1	-40	-39	0	0	1.04446	1.04278	-0.00167466	0.285569	0.286759	0.416928	0.100836	0.835594	1.40071	1.40655	0.00416928	0.700357	0.703277	0.00416928	-0.00169346	0.285555	0.0999906	[-0.09726277]
2	1.435	0.1	-40	-38	0	0	1.04446	1.04106	-0.00339494	0.285569	0.287972	0.841651	0.10169	1.69039	1.40071	1.4125	0.00841651	0.700357	0.706252	0.00841651	-0.00343303	0.285542	0.0999811	[-0.09986113]
3	1.435	0.1	-40	-37	0	0	1.04446	1.03929	-0.0051603	0.285569	0.289206	1.27385	0.102564	2.56392	1.40071	1.41856	0.0127385	0.700357	0.709279	0.0127385	-0.0052182	0.285528	0.0999714	[-0.10242907]
4	1.435	0.1	-40	-36	0	0	1.04446	1.03748	-0.00697021	0.285569	0.290461	1.7132	0.103456	3.45575	1.40071	1.42471	0.017132	0.700357	0.712356	0.017132	-0.00704842	0.285514	0.0999616	[-0.1049658]
5	1.435	0.1	-40	-35	0	0	1.04446	1.03563	-0.00882411	0.285569	0.291735	2.1594	0.104365	4.36543	1.40071	1.43096	0.021594	0.700357	0.715481	0.021594	-0.00892313	0.285499	0.0999515	[-0.10747056]
6	1.435	0.1	-40	-34	0	0	1.04446	1.03373	-0.0107214	0.285569	0.293028	2.61213	0.105292	5.29249	1.40071	1.4373	0.0261213	0.700357	0.718651	0.0261213	-0.0108418	0.285485	0.0999414	[-0.10994259]
7	1.435	0.1	-40	-33	0	0	1.04446	1.03179	-0.0126616	0.285569	0.294339	3.07109	0.106237	6.2365	1.40071	1.44373	0.0307109	0.700357	0.721866	0.0307109	-0.0128037	0.28547	0.0999311	[-0.11238113]
8	1.435	0.1	-40	-32	0	0	1.04446	1.02981	-0.0146441	0.285569	0.295666	3.53599	0.107197	7.19701	1.40071	1.45024	0.0353599	0.700357	0.725122	0.0353599	-0.0148084	0.285455	0.0999207	[-0.11478543]
9	1.435	0.1	-40	-31	0	0	1.04446	1.02779	-0.0166682	0.285569	0.29701	4.00653	0.108174	8.17358	1.40071	1.45683	0.0400653	0.700357	0.728417	0.0400653	-0.0168552	0.28544	0.0999101	[-0.11715477]
10	1.435	0.1	-40	-30	0	0	1.04446	1.02572	-0.0187334	0.285569	0.298369	4.48242	0.109166	9.16576	1.40071	1.4635	0.0448242	0.700357	0.73175	0.0448242	-0.0189436	0.285425	0.0998994	[-0.11948842]
11	1.435	0.1	-40	-29	0	0	1.04446	1.02362	-0.0208389	0.285569	0.299742	4.96338	0.110173	10.1731	1.40071	1.47024	0.0496338	0.700357	0.735118	0.0496338	-0.0210728	0.28541	0.0998886	[-0.12178568]
12	1.435	0.1	-40	-28	0	0	1.04446	1.02147	-0.0229843	0.285569	0.30113	5.44913	0.111195	11.1952	1.40071	1.47704	0.0544913	0.700357	0.73852	0.0544913	-0.0232422	0.285394	0.0998777	[-0.12404583]
13	1.435	0.1	-40	-27	0	0	1.04446	1.01929	-0.0251687	0.285569	0.30253	5.93941	0.112232	12.2316	1.40071	1.48391	0.0593941	0.700357	0.741954	0.0593941	-0.0254511	0.285378	0.0998668	[-0.12626821]
14	1.435	0.1	-40	-26	0	0	1.04446	1.01706	-0.0273916	0.285569	0.303942	6.43395	0.113282	13.2819	1.40071	1.49084	0.0643395	0.700357	0.745418	0.0643395	-0.027699	0.285362	0.0998557	[-0.12845212]
15	1.435	0.1	-40	-25	0	0	1.04446	1.0148	-0.0296523	0.285569	0.305366	6.93249	0.114346	14.3456	1.40071	1.49782	0.0693249	0.700357	0.748909	0.0693249	-0.029985	0.285346	0.0998445	[-0.1305969]
16	1.435	0.1	-40	-24	0	0	1.04446	1.0125	-0.0319501	0.285569	0.3068	7.43476	0.115422	15.4223	1.40071	1.50485	0.0743476	0.700357	0.752427	0.0743476	-0.0323086	0.28533	0.0998332	[-0.1327019]
17	1.435	0.1	-40	-23	0	0	1.04446	1.01017	-0.0342842	0.285569	0.308244	7.94054	0.116512	16.5116	1.40071	1.51194	0.0794054	0.700357	0.755969	0.0794054	-0.034669	0.285314	0.0998219	[-0.13476648]
18	1.435	0.1	-40	-22	0	0	1.04446	1.0078	-0.0366541	0.285569	0.309698	8.44957	0.117613	17.6131	1.40071	1.51907	0.0844957	0.700357	0.759534	0.0844957	-0.0370654	0.285298	0.0998105	[-0.13679]
19	1.435	0.1	-40	-21	0	0	1.04446	1.0054	-0.0390589	0.285569	0.31116	8.96161	0.118726	18.7263	1.40071	1.52624	0.0896161	0.700357	0.76312	0.0896161	-0.0394972	0.285281	0.099799	[-0.13877186]
20	1.435	0.1	-40	-20	0	0	1.04446	1.00296	-0.0414979	0.285569	0.31263	9.47644	0.119851	19.8509	1.40071	1.53345	0.0947644	0.700357	0.766726	0.0947644	-0.0419635	0.285265	0.0997874	[-0.14071145]
21	1.435	0.1	-40	-19	0	0	1.04446	1.00048	-0.0439704	0.285569	0.314108	9.99383	0.120986	20.9864	1.40071	1.5407	0.0999383	0.700357	0.77035	0.0999383	-0.0444638	0.285248	0.0997758	[-0.14260818]
22	1.435	0.1	-40	-18	0	0	1.04446	0.997979	-0.0464756	0.285569	0.315592	10.5136	0.122132	22.1325	1.40071	1.54798	0.105136	0.700357	0.773989	0.105136	-0.0469971	0.285232	0.0997642	[-0.14446147]
23	1.435	0.1	-40	-17	0	0	1.04446	0.995442	-0.0490128	0.285569	0.317082	11.0354	0.123289	23.2886	1.40071	1.55529	0.110354	0.700357	0.777644	0.110354	-0.0495628	0.285215	0.0997525	[-0.14627075]
24	1.435	0.1	-40	-16	0	0	1.04446	0.992874	-0.0515812	0.285569	0.318578	11.5591	0.124454	24.4544	1.40071	1.56262	0.115591	0.700357	0.781312	0.115591	-0.05216	0.285198	0.0997408	[-0.14803548]
25	1.435	0.1	-40	-15	0	0	1.04446	0.990275	-0.0541799	0.285569	0.320078	12.0846	0.12563	25.6296	1.40071	1.56998	0.120846	0.700357	0.784992	0.120846	-0.0547879	0.285181	0.099729	[-0.14975511]
26	1.435	0.1	-40	-14	0	0	1.04446	0.987647	-0.0568083	0.285569	0.321583	12.6116	0.126814	26.8136	1.40071	1.57737	0.126116	0.700357	0.788683	0.126116	-0.0574458	0.285165	0.0997172	[-0.15142913]
27	1.435	0.1	-40	-13	0	0	1.04446	0.98499	-0.0594655	0.285569	0.323092	13.1398	0.128006	28.0062	1.40071	1.58477	0.131398	0.700357	0.792383	0.131398	-0.0601328	0.285148	0.0997053	[-0.15305702]
28	1.435	0.1	-40	-12	0	0	1.04446	0.982304	-0.0621508	0.285569	0.324604	13.6692	0.129207	29.2069	1.40071	1.59218	0.136692	0.700357	0.79609	0.136692	-0.0628482	0.285131	0.0996935	[-0.15463828]
29	1.435	0.1	-40	-11	0	0	1.04446	0.979592	-0.0648632	0.285569	0.326118	14.1995	0.130415	30.4153	1.40071	1.59961	0.141995	0.700357	0.799804	0.141995	-0.065591	0.285114	0.0996816	[-0.15617245]
30	1.435	0.1	-40	-10	0	0	1.04446	0.976853	-0.0676019	0.285569	0.327635	14.7306	0.131631	31.6311	1.40071	1.60705	0.147306	0.700357	0.803524	0.147306	-0.0683605	0.285097	0.0996697	[-0.15765904]
31	1.435	0.1	-40	-9	0	0	1.04446	0.974089	-0.0703662	0.285569	0.329153	15.2622	0.132854	32.8538	1.40071	1.61449	0.152622	0.700357	0.807247	0.152622	-0.0711558	0.28508	0.0996578	[-0.15909761]
32	1.435	0.1	-40	-8	0	0	1.04446	0.9713	-0.0731552	0.285569	0.330672	15.7942	0.134083	34.083	1.40071	1.62195	0.157942	0.700357	0.810973	0.157942	-0.0739761	0.285063	0.0996459	[-0.16048771]
33	1.435	0.1	-40	-7	0	0	1.04446	0.968487	-0.075968	0.285569	0.332192	16.3265	0.135318	35.3185	1.40071	1.6294	0.163265	0.700357	0.814701	0.163265	-0.0768205	0.285045	0.0996339	[-0.16182893]
34	1.435	0.1	-40	-6	0	0	1.04446	0.965651	-0.0788038	0.285569	0.333712	16.8588	0.13656	36.5597	1.40071	1.63686	0.168588	0.700357	0.818429	0.168588	-0.0796881	0.285028	0.099622	[-0.16312085]
35	1.435	0.1	-40	-5	0	0	1.04446	0.962793	-0.0816617	0.285569	0.335232	17.391	0.137806	37.8064	1.40071	1.64431	0.17391	0.700357	0.822156	0.17391	-0.082578	0.285011	0.0996101	[-0.16436309]
36	1.435	0.1	-40	-4	0	0	1.04446	0.959914	-0.0845409	0.285569	0.336751	17.9229	0.139058	39.0581	1.40071	1.65176	0.179229	0.700357	0.825881	0.179229	-0.0854895	0.284994	0.0995982	[-0.16555526]
37	1.435	0.1	-40	-3	0	0	1.04446	0.957015	-0.0874404	0.285569	0.338269	18.4544	0.140315	40.3145	1.40071	1.65921	0.184544	0.700357	0.829604	0.184544	-0.0884216	0.284977	0.0995863	[-0.166697]
38	1.435	0.1	-40	-2	0	0	1.04446	0.954096	-0.0903594	0.285569	0.339785	18.9854	0.141575	41.5752	1.40071	1.66665	0.189854	0.700357	0.833323	0.189854	-0.0913733	0.28496	0.0995744	[-0.16778796]
39	1.435	0.1	-40	-1	0	0	1.04446	0.951158	-0.093297	0.285569	0.341299	19.5156	0.14284	42.8399	1.40071	1.67407	0.195156	0.700357	0.837036	0.195156	-0.0943439	0.284943	0.0995625	[-0.16882781]
40	1.435	0.1	-40	0	0	0	1.04446	0.948203	-0.0962523	0.285569	0.342811	20.045	0.144108	44.1081	1.40071	1.68149	0.20045	0.700357	0.840744	0.20045	-0.0973324	0.284926	0.0995507	[-0.16981624]
41	1.435	0.2	-40	-40	0	0	1.04446	1.04446	0	0.403855	0.403855	0	0.2	0	1.98091	1.98091	0	0.990454	0.990454	0	0	0.403855	0.2	[-0.09463479]
42	1.435	0.2	-40	-39	0	0	1.04446	1.04278	-0.00167466	0.403855	0.404699	0.208897	0.200836	0.41823	1.98091	1.98505	0.00208897	0.990454	0.992523	0.00208897	-0.00169346	0.403846	0.199991	[-0.09726277]
43	1.435	0.2	-40	-38	0	0	1.04446	1.04106	-0.00339494	0.403855	0.405562	0.422582	0.201694	0.846949	1.98091	1.98928	0.00422582	0.990454	0.99464	0.00422582	-0.00343303	0.403836	0.199981	[-0.09986113]
44	1.435	0.2	-40	-37	0	0	1.04446	1.03929	-0.0051603	0.403855	0.406443	0.640929	0.202572	1.28597	1.98091	1.99361	0.00640929	0.990454	0.996803	0.00640929	-0.0052182	0.403826	0.199971	[-0.10242907]
45	1.435	0.2	-40	-36	0	0	1.04446	1.03748	-0.00697021	0.403855	0.407344	0.863814	0.20347	1.73509	1.98091	1.99802	0.00863814	0.990454	0.99901	0.00863814	-0.00704842	0.403816	0.199961	[-0.1049658]
46	1.435	0.2	-40	-35	0	0	1.04446	1.03563	-0.00882411	0.403855	0.408262	1.09111	0.204388	2.19412	1.98091	2.00252	0.0109111	0.990454	1.00126	0.0109111	-0.00892313	0.403806	0.199951	[-0.10747056]
47	1.435	0.2	-40	-34	0	0	1.04446	1.03373	-0.0107214	0.403855	0.409197	1.32269	0.205326	2.66287	1.98091	2.00711	0.0132269	0.990454	1.00356	0.0132269	-0.0108418	0.403795	0.199941	[-0.10994259]
48	1.435	0.2	-40	-33	0	0	1.04446	1.03179	-0.0126616	0.403855	0.410149	1.55842	0.206282	3.14112	1.98091	2.01178	0.0155842	0.990454	1.00589	0.0155842	-0.0128037	0.403784	0.19993	[-0.11238113]
49	1.435	0.2	-40	-32	0	0	1.04446	1.02981	-0.0146441	0.403855	0.411117	1.79818	0.207257	3.62869	1.98091	2.01653	0.0179818	0.990454	1.00826	0.0179818	-0.0148084	0.403774	0.199919	[-0.11478543]
50	1.435	0.2	-40	-31	0	0	1.04446	1.02779	-0.0166682	0.403855	0.412101	2.04183	0.208251	4.12536	1.98091	2.02136	0.0204183	0.990454	1.01068	0.0204183	-0.0168552	0.403762	0.199908	[-0.11715477]
51	1.435	0.2	-40	-30	0	0	1.04446	1.02572	-0.0187334	0.403855	0.4131	2.28926	0.209262	4.63093	1.98091	2.02626	0.0228926	0.990454	1.01313	0.0228926	-0.0189436	0.403751	0.199897	[-0.11948842]
52	1.435	0.2	-40	-29	0	0	1.04446	1.02362	-0.0208389	0.403855	0.414114	2.54033	0.21029	5.1452	1.98091	2.03123	0.0254033	0.990454	1.01562	0.0254033	-0.0210728	0.40374	0.199886	[-0.12178568]
53	1.435	0.2	-40	-28	0	0	1.04446	1.02147	-0.0229843	0.403855	0.415142	2.79492	0.211336	5.66795	1.98091	2.03627	0.0279492	0.990454	1.01814	0.0279492	-0.0232422	0.403728	0.199875	[-0.12404583]
54	1.435	0.2	-40	-27	0	0	1.04446	1.01929	-0.0251687	0.403855	0.416184	3.05289	0.212398	6.19898	1.98091	2.04138	0.0305289	0.990454	1.02069	0.0305289	-0.0254511	0.403717	0.199863	[-0.12626821]
55	1.435	0.2	-40	-26	0	0	1.04446	1.01706	-0.0273916	0.403855	0.417239	3.31412	0.213476	6.73807	1.98091	2.04656	0.0331412	0.990454	1.02328	0.0331412	-0.027699	0.403705	0.199851	[-0.12845212]
56	1.435	0.2	-40	-25	0	0	1.04446	1.0148	-0.0296523	0.403855	0.418307	3.57848	0.21457	7.28502	1.98091	2.0518	0.0357848	0.990454	1.0259	0.0357848	-0.029985	0.403693	0.199839	[-0.1305969]
57	1.435	0.2	-40	-24	0	0	1.04446	1.0125	-0.0319501	0.403855	0.419387	3.84586	0.215679	7.83962	1.98091	2.05709	0.0384586	0.990454	1.02855	0.0384586	-0.0323086	0.403681	0.199827	[-0.1327019]
58	1.435	0.2	-40	-23	0	0	1.04446	1.01017	-0.0342842	0.403855	0.420478	4.11611	0.216803	8.40164	1.98091	2.06245	0.0411611	0.990454	1.03122	0.0411611	-0.034669	0.403668	0.199815	[-0.13476648]
59	1.435	0.2	-40	-22	0	0	1.04446	1.0078	-0.0366541	0.403855	0.421581	4.38912	0.217942	8.97088	1.98091	2.06785	0.0438912	0.990454	1.03393	0.0438912	-0.0370654	0.403656	0.199803	[-0.13679]
60	1.435	0.2	-40	-21	0	0	1.04446	1.0054	-0.0390589	0.403855	0.422694	4.66476	0.219094	9.54712	1.98091	2.07331	0.0466476	0.990454	1.03666	0.0466476	-0.0394972	0.403644	0.199791	[-0.13877186]
61	1.435	0.2	-40	-20	0	0	1.04446	1.00296	-0.0414979	0.403855	0.423817	4.94291	0.22026	10.1301	1.98091	2.07882	0.0494291	0.990454	1.03941	0.0494291	-0.0419635	0.403631	0.199778	[-0.14071145]
62	1.435	0.2	-40	-19	0	0	1.04446	1.00048	-0.0439704	0.403855	0.42495	5.22345	0.22144	10.7198	1.98091	2.08438	0.0522345	0.990454	1.04219	0.0522345	-0.0444638	0.403618	0.199766	[-0.14260818]
63	1.435	0.2	-40	-18	0	0	1.04446	0.997979	-0.0464756	0.403855	0.426092	5.50626	0.222631	11.3157	1.98091	2.08998	0.0550626	0.990454	1.04499	0.0550626	-0.0469971	0.403605	0.199753	[-0.14446147]
64	1.435	0.2	-40	-17	0	0	1.04446	0.995442	-0.0490128	0.403855	0.427243	5.79122	0.223836	11.9178	1.98091	2.09563	0.0579122	0.990454	1.04781	0.0579122	-0.0495628	0.403593	0.19974	[-0.14627075]
65	1.435	0.2	-40	-16	0	0	1.04446	0.992874	-0.0515812	0.403855	0.428402	6.0782	0.225052	12.5258	1.98091	2.10131	0.060782	0.990454	1.05066	0.060782	-0.05216	0.40358	0.199727	[-0.14803548]
66	1.435	0.2	-40	-15	0	0	1.04446	0.990275	-0.0541799	0.403855	0.429569	6.36709	0.226279	13.1396	1.98091	2.10704	0.0636709	0.990454	1.05352	0.0636709	-0.0547879	0.403566	0.199714	[-0.14975511]
67	1.435	0.2	-40	-14	0	0	1.04446	0.987647	-0.0568083	0.403855	0.430743	6.65778	0.227518	13.7588	1.98091	2.11279	0.0665778	0.990454	1.0564	0.0665778	-0.0574458	0.403553	0.199701	[-0.15142913]
68	1.435	0.2	-40	-13	0	0	1.04446	0.98499	-0.0594655	0.403855	0.431924	6.95015	0.228767	14.3833	1.98091	2.11858	0.0695015	0.990454	1.05929	0.0695015	-0.0601328	0.40354	0.199688	[-0.15305702]
69	1.435	0.2	-40	-12	0	0	1.04446	0.982304	-0.0621508	0.403855	0.433111	7.24408	0.230026	15.0129	1.98091	2.12441	0.0724408	0.990454	1.0622	0.0724408	-0.0628482	0.403527	0.199675	[-0.15463828]
70	1.435	0.2	-40	-11	0	0	1.04446	0.979592	-0.0648632	0.403855	0.434304	7.53946	0.231295	15.6474	1.98091	2.13026	0.0753946	0.990454	1.06513	0.0753946	-0.065591	0.403513	0.199662	[-0.15617245]
71	1.435	0.2	-40	-10	0	0	1.04446	0.976853	-0.0676019	0.403855	0.435502	7.83618	0.232573	16.2864	1.98091	2.13614	0.0783618	0.990454	1.06807	0.0783618	-0.0683605	0.4035	0.199648	[-0.15765904]
72	1.435	0.2	-40	-9	0	0	1.04446	0.974089	-0.0703662	0.403855	0.436705	8.13414	0.23386	16.9299	1.98091	2.14204	0.0813414	0.990454	1.07102	0.0813414	-0.0711558	0.403486	0.199635	[-0.15909761]
73	1.435	0.2	-40	-8	0	0	1.04446	0.9713	-0.0731552	0.403855	0.437913	8.43321	0.235155	17.5776	1.98091	2.14796	0.0843321	0.990454	1.07398	0.0843321	-0.0739761	0.403473	0.199622	[-0.16048771]
74	1.435	0.2	-40	-7	0	0	1.04446	0.968487	-0.075968	0.403855	0.439125	8.7333	0.236459	18.2293	1.98091	2.15391	0.087333	0.990454	1.07695	0.087333	-0.0768205	0.403459	0.199608	[-0.16182893]
75	1.435	0.2	-40	-6	0	0	1.04446	0.965651	-0.0788038	0.403855	0.44034	9.03429	0.23777	18.8848	1.98091	2.15987	0.0903429	0.990454	1.07993	0.0903429	-0.0796881	0.403446	0.199595	[-0.16312085]
76	1.435	0.2	-40	-5	0	0	1.04446	0.962793	-0.0816617	0.403855	0.441559	9.33609	0.239088	19.5438	1.98091	2.16585	0.0933609	0.990454	1.08292	0.0933609	-0.082578	0.403432	0.199581	[-0.16436309]
77	1.435	0.2	-40	-4	0	0	1.04446	0.959914	-0.0845409	0.403855	0.442781	9.63859	0.240412	20.2062	1.98091	2.17184	0.0963859	0.990454	1.08592	0.0963859	-0.0854895	0.403418	0.199568	[-0.16555526]
78	1.435	0.2	-40	-3	0	0	1.04446	0.957015	-0.0874404	0.403855	0.444005	9.94168	0.241743	20.8717	1.98091	2.17784	0.0994168	0.990454	1.08892	0.0994168	-0.0884216	0.403404	0.199554	[-0.166697]
79	1.435	0.2	-40	-2	0	0	1.04446	0.954096	-0.0903594	0.403855	0.445231	10.2453	0.24308	21.5402	1.98091	2.18386	0.102453	0.990454	1.09193	0.102453	-0.0913733	0.403391	0.19954	[-0.16778796]
80	1.435	0.2	-40	-1	0	0	1.04446	0.951158	-0.093297	0.403855	0.446459	10.5493	0.244423	22.2114	1.98091	2.18988	0.105493	0.990454	1.09494	0.105493	-0.0943439	0.403377	0.199527	[-0.16882781]
81	1.435	0.2	-40	0	0	0	1.04446	0.948203	-0.0962523	0.403855	0.447688	10.8535	0.24577	22.8851	1.98091	2.19591	0.108535	0.990454	1.09795	0.108535	-0.0973324	0.403363	0.199513	[-0.16981624]
82	1.435	0.3	-40	-40	0	0	1.04446	1.04446	0	0.494619	0.494619	1.1223e-14	0.3	1.85037e-14	2.42611	2.42611	0	1.21305	1.21305	0	0	0.494619	0.3	[-0.09463479]
83	1.435	0.3	-40	-39	0	0	1.04446	1.04278	-0.00167466	0.494619	0.495309	0.139361	0.300837	0.278917	2.42611	2.42949	0.00139361	1.21305	1.21474	0.00139361	-0.00169346	0.494612	0.299991	[-0.09726277]
84	1.435	0.3	-40	-38	0	0	1.04446	1.04106	-0.00339494	0.494619	0.496015	0.282116	0.301695	0.565027	2.42611	2.43295	0.00282116	1.21305	1.21648	0.00282116	-0.00343303	0.494604	0.299981	[-0.09986113]
85	1.435	0.3	-40	-37	0	0	1.04446	1.03929	-0.0051603	0.494619	0.496737	0.428191	0.302575	0.858216	2.42611	2.4365	0.00428191	1.21305	1.21825	0.00428191	-0.0052182	0.494596	0.299971	[-0.10242907]
86	1.435	0.3	-40	-36	0	0	1.04446	1.03748	-0.00697021	0.494619	0.497476	0.577515	0.303475	1.15837	2.42611	2.44012	0.00577515	1.21305	1.22006	0.00577515	-0.00704842	0.494587	0.299961	[-0.1049658]
87	1.435	0.3	-40	-35	0	0	1.04446	1.03563	-0.00882411	0.494619	0.49823	0.730013	0.304396	1.46536	2.42611	2.44382	0.00730013	1.21305	1.22191	0.00730013	-0.00892313	0.494579	0.299951	[-0.10747056]
88	1.435	0.3	-40	-34	0	0	1.04446	1.03373	-0.0107214	0.494619	0.499	0.885611	0.305337	1.77906	2.42611	2.44759	0.00885611	1.21305	1.2238	0.00885611	-0.0108418	0.49457	0.29994	[-0.10994259]
89	1.435	0.3	-40	-33	0	0	1.04446	1.03179	-0.0126616	0.494619	0.499784	1.04423	0.306298	2.09937	2.42611	2.45144	0.0104423	1.21305	1.22572	0.0104423	-0.0128037	0.494561	0.29993	[-0.11238113]
90	1.435	0.3	-40	-32	0	0	1.04446	1.02981	-0.0146441	0.494619	0.500583	1.2058	0.307278	2.42614	2.42611	2.45536	0.012058	1.21305	1.22768	0.012058	-0.0148084	0.494552	0.299919	[-0.11478543]
91	1.435	0.3	-40	-31	0	0	1.04446	1.02779	-0.0166682	0.494619	0.501397	1.37024	0.308278	2.75926	2.42611	2.45935	0.0137024	1.21305	1.22968	0.0137024	-0.0168552	0.494543	0.299908	[-0.11715477]
92	1.435	0.3	-40	-30	0	0	1.04446	1.02572	-0.0187334	0.494619	0.502224	1.53747	0.309296	3.09859	2.42611	2.46341	0.0153747	1.21305	1.2317	0.0153747	-0.0189436	0.494534	0.299896	[-0.11948842]
93	1.435	0.3	-40	-29	0	0	1.04446	1.02362	-0.0208389	0.494619	0.503065	1.70742	0.310332	3.444	2.42611	2.46753	0.0170742	1.21305	1.23377	0.0170742	-0.0210728	0.494525	0.299885	[-0.12178568]
94	1.435	0.3	-40	-28	0	0	1.04446	1.02147	-0.0229843	0.494619	0.503918	1.88001	0.311386	3.79537	2.42611	2.47172	0.0188001	1.21305	1.23586	0.0188001	-0.0232422	0.494515	0.299873	[-0.12404583]
95	1.435	0.3	-40	-27	0	0	1.04446	1.01929	-0.0251687	0.494619	0.504785	2.05516	0.312458	4.15255	2.42611	2.47597	0.0205516	1.21305	1.23798	0.0205516	-0.0254511	0.494505	0.299862	[-0.12626821]
96	1.435	0.3	-40	-26	0	0	1.04446	1.01706	-0.0273916	0.494619	0.505663	2.23278	0.313546	4.51542	2.42611	2.48028	0.0223278	1.21305	1.24014	0.0223278	-0.027699	0.494495	0.29985	[-0.12845212]
97	1.435	0.3	-40	-25	0	0	1.04446	1.0148	-0.0296523	0.494619	0.506554	2.41281	0.314652	4.88384	2.42611	2.48465	0.0241281	1.21305	1.24232	0.0241281	-0.029985	0.494485	0.299838	[-0.1305969]
98	1.435	0.3	-40	-24	0	0	1.04446	1.0125	-0.0319501	0.494619	0.507456	2.59516	0.315773	5.25767	2.42611	2.48907	0.0259516	1.21305	1.24453	0.0259516	-0.0323086	0.494475	0.299825	[-0.1327019]
99	1.435	0.3	-40	-23	0	0	1.04446	1.01017	-0.0342842	0.494619	0.508369	2.77975	0.31691	5.63677	2.42611	2.49355	0.0277975	1.21305	1.24677	0.0277975	-0.034669	0.494465	0.299813	[-0.13476648]
100	1.435	0.3	-40	-22	0	0	1.04446	1.0078	-0.0366541	0.494619	0.509292	2.96651	0.318063	6.02101	2.42611	2.49808	0.0296651	1.21305	1.24904	0.0296651	-0.0370654	0.494455	0.2998	[-0.13679]
101	1.435	0.3	-40	-21	0	0	1.04446	1.0054	-0.0390589	0.494619	0.510226	3.15534	0.319231	6.41025	2.42611	2.50266	0.0315534	1.21305	1.25133	0.0315534	-0.0394972	0.494444	0.299788	[-0.13877186]
102	1.435	0.3	-40	-20	0	0	1.04446	1.00296	-0.0414979	0.494619	0.51117	3.34619	0.320413	6.80435	2.42611	2.50729	0.0334619	1.21305	1.25365	0.0334619	-0.0419635	0.494434	0.299775	[-0.14071145]
103	1.435	0.3	-40	-19	0	0	1.04446	1.00048	-0.0439704	0.494619	0.512124	3.53896	0.321609	7.20316	2.42611	2.51197	0.0353896	1.21305	1.25598	0.0353896	-0.0444638	0.494423	0.299762	[-0.14260818]
104	1.435	0.3	-40	-18	0	0	1.04446	0.997979	-0.0464756	0.494619	0.513086	3.73357	0.32282	7.60654	2.42611	2.51669	0.0373357	1.21305	1.25834	0.0373357	-0.0469971	0.494412	0.299749	[-0.14446147]
105	1.435	0.3	-40	-17	0	0	1.04446	0.995442	-0.0490128	0.494619	0.514058	3.92995	0.324043	8.01435	2.42611	2.52145	0.0392995	1.21305	1.26073	0.0392995	-0.0495628	0.494401	0.299735	[-0.14627075]
106	1.435	0.3	-40	-16	0	0	1.04446	0.992874	-0.0515812	0.494619	0.515037	4.12802	0.325279	8.42645	2.42611	2.52626	0.0412802	1.21305	1.26313	0.0412802	-0.05216	0.49439	0.299722	[-0.14803548]
107	1.435	0.3	-40	-15	0	0	1.04446	0.990275	-0.0541799	0.494619	0.516025	4.3277	0.326528	8.8427	2.42611	2.5311	0.043277	1.21305	1.26555	0.043277	-0.0547879	0.494379	0.299709	[-0.14975511]
108	1.435	0.3	-40	-14	0	0	1.04446	0.987647	-0.0568083	0.494619	0.51702	4.52892	0.327789	9.26294	2.42611	2.53598	0.0452892	1.21305	1.26799	0.0452892	-0.0574458	0.494368	0.299695	[-0.15142913]
109	1.435	0.3	-40	-13	0	0	1.04446	0.98499	-0.0594655	0.494619	0.518023	4.73158	0.329061	9.68704	2.42611	2.5409	0.0473158	1.21305	1.27045	0.0473158	-0.0601328	0.494357	0.299682	[-0.15305702]
110	1.435	0.3	-40	-12	0	0	1.04446	0.982304	-0.0621508	0.494619	0.519032	4.93563	0.330345	10.1149	2.42611	2.54585	0.0493563	1.21305	1.27293	0.0493563	-0.0628482	0.494345	0.299668	[-0.15463828]
111	1.435	0.3	-40	-11	0	0	1.04446	0.979592	-0.0648632	0.494619	0.520048	5.14097	0.331639	10.5462	2.42611	2.55083	0.0514097	1.21305	1.27542	0.0514097	-0.065591	0.494334	0.299654	[-0.15617245]
112	1.435	0.3	-40	-10	0	0	1.04446	0.976853	-0.0676019	0.494619	0.521069	5.34753	0.332943	10.981	2.42611	2.55584	0.0534753	1.21305	1.27792	0.0534753	-0.0683605	0.494323	0.29964	[-0.15765904]
113	1.435	0.3	-40	-9	0	0	1.04446	0.974089	-0.0703662	0.494619	0.522097	5.55524	0.334257	11.4191	2.42611	2.56088	0.0555524	1.21305	1.28044	0.0555524	-0.0711558	0.494311	0.299626	[-0.15909761]
114	1.435	0.3	-40	-8	0	0	1.04446	0.9713	-0.0731552	0.494619	0.523129	5.76403	0.335581	11.8603	2.42611	2.56595	0.0576403	1.21305	1.28297	0.0576403	-0.0739761	0.494299	0.299612	[-0.16048771]
115	1.435	0.3	-40	-7	0	0	1.04446	0.968487	-0.075968	0.494619	0.524167	5.9738	0.336913	12.3045	2.42611	2.57104	0.059738	1.21305	1.28552	0.059738	-0.0768205	0.494288	0.299598	[-0.16182893]
116	1.435	0.3	-40	-6	0	0	1.04446	0.965651	-0.0788038	0.494619	0.525209	6.1845	0.338254	12.7515	2.42611	2.57615	0.061845	1.21305	1.28808	0.061845	-0.0796881	0.494276	0.299584	[-0.16312085]
117	1.435	0.3	-40	-5	0	0	1.04446	0.962793	-0.0816617	0.494619	0.526255	6.39605	0.339604	13.2012	2.42611	2.58128	0.0639605	1.21305	1.29064	0.0639605	-0.082578	0.494264	0.29957	[-0.16436309]
118	1.435	0.3	-40	-4	0	0	1.04446	0.959914	-0.0845409	0.494619	0.527306	6.60837	0.34096	13.6534	2.42611	2.58643	0.0660837	1.21305	1.29322	0.0660837	-0.0854895	0.494253	0.299555	[-0.16555526]
119	1.435	0.3	-40	-3	0	0	1.04446	0.957015	-0.0874404	0.494619	0.528359	6.82139	0.342324	14.1081	2.42611	2.5916	0.0682139	1.21305	1.2958	0.0682139	-0.0884216	0.494241	0.299541	[-0.166697]
120	1.435	0.3	-40	-2	0	0	1.04446	0.954096	-0.0903594	0.494619	0.529416	7.03503	0.343695	14.565	2.42611	2.59679	0.0703503	1.21305	1.29839	0.0703503	-0.0913733	0.494229	0.299527	[-0.16778796]
121	1.435	0.3	-40	-1	0	0	1.04446	0.951158	-0.093297	0.494619	0.530475	7.24924	0.345072	15.024	2.42611	2.60198	0.0724924	1.21305	1.30099	0.0724924	-0.0943439	0.494217	0.299512	[-0.16882781]
122	1.435	0.3	-40	0	0	0	1.04446	0.948203	-0.0962523	0.494619	0.531537	7.46392	0.346455	15.4849	2.42611	2.60719	0.0746392	1.21305	1.3036	0.0746392	-0.0973324	0.494205	0.299498	[-0.16981624]
123	1.435	0.4	-40	-40	0	0	1.04446	1.04446	0	0.571137	0.571137	0	0.4	-1.38778e-14	2.80143	2.80143	0	1.40071	1.40071	0	0	0.571137	0.4	[-0.09463479]
124	1.435	0.4	-40	-39	0	0	1.04446	1.04278	-0.00167466	0.571137	0.571734	0.104557	0.400837	0.209224	2.80143	2.80436	0.00104557	1.40071	1.40218	0.00104557	-0.00169346	0.571131	0.399991	[-0.09726277]
125	1.435	0.4	-40	-38	0	0	1.04446	1.04106	-0.00339494	0.571137	0.572347	0.211735	0.401696	0.423919	2.80143	2.80736	0.00211735	1.40071	1.40368	0.00211735	-0.00343303	0.571124	0.399981	[-0.09986113]
126	1.435	0.4	-40	-37	0	0	1.04446	1.03929	-0.0051603	0.571137	0.572973	0.321485	0.402576	0.644004	2.80143	2.81043	0.00321485	1.40071	1.40522	0.00321485	-0.0052182	0.571117	0.399971	[-0.10242907]
127	1.435	0.4	-40	-36	0	0	1.04446	1.03748	-0.00697021	0.571137	0.573615	0.433756	0.403478	0.869394	2.80143	2.81358	0.00433756	1.40071	1.40679	0.00433756	-0.00704842	0.571109	0.399961	[-0.1049658]
128	1.435	0.4	-40	-35	0	0	1.04446	1.03563	-0.00882411	0.571137	0.57427	0.548498	0.4044	1.10001	2.80143	2.81679	0.00548498	1.40071	1.4084	0.00548498	-0.00892313	0.571102	0.399951	[-0.10747056]
129	1.435	0.4	-40	-34	0	0	1.04446	1.03373	-0.0107214	0.571137	0.574939	0.665659	0.405343	1.33575	2.80143	2.82008	0.00665659	1.40071	1.41004	0.00665659	-0.0108418	0.571095	0.39994	[-0.10994259]
130	1.435	0.4	-40	-33	0	0	1.04446	1.03179	-0.0126616	0.571137	0.575622	0.785187	0.406306	1.57654	2.80143	2.82342	0.00785187	1.40071	1.41171	0.00785187	-0.0128037	0.571087	0.39993	[-0.11238113]
131	1.435	0.4	-40	-32	0	0	1.04446	1.02981	-0.0146441	0.571137	0.576318	0.907029	0.407289	1.82228	2.80143	2.82684	0.00907029	1.40071	1.41342	0.00907029	-0.0148084	0.571079	0.399919	[-0.11478543]
132	1.435	0.4	-40	-31	0	0	1.04446	1.02779	-0.0166682	0.571137	0.577026	1.03113	0.408292	2.07289	2.80143	2.83031	0.0103113	1.40071	1.41516	0.0103113	-0.0168552	0.571071	0.399907	[-0.11715477]
133	1.435	0.4	-40	-30	0	0	1.04446	1.02572	-0.0187334	0.571137	0.577748	1.15744	0.409313	2.32827	2.80143	2.83385	0.0115744	1.40071	1.41693	0.0115744	-0.0189436	0.571063	0.399896	[-0.11948842]
134	1.435	0.4	-40	-29	0	0	1.04446	1.02362	-0.0208389	0.571137	0.578481	1.2859	0.410353	2.58833	2.80143	2.83745	0.012859	1.40071	1.41873	0.012859	-0.0210728	0.571055	0.399885	[-0.12178568]
135	1.435	0.4	-40	-28	0	0	1.04446	1.02147	-0.0229843	0.571137	0.579227	1.41645	0.411412	2.85297	2.80143	2.84111	0.0141645	1.40071	1.42055	0.0141645	-0.0232422	0.571046	0.399873	[-0.12404583]
136	1.435	0.4	-40	-27	0	0	1.04446	1.01929	-0.0251687	0.571137	0.579984	1.54905	0.412488	3.12209	2.80143	2.84482	0.0154905	1.40071	1.42241	0.0154905	-0.0254511	0.571038	0.399861	[-0.12626821]
137	1.435	0.4	-40	-26	0	0	1.04446	1.01706	-0.0273916	0.571137	0.580753	1.68363	0.413582	3.39561	2.80143	2.84859	0.0168363	1.40071	1.4243	0.0168363	-0.027699	0.571029	0.399849	[-0.12845212]
138	1.435	0.4	-40	-25	0	0	1.04446	1.0148	-0.0296523	0.571137	0.581533	1.82014	0.414694	3.67341	2.80143	2.85242	0.0182014	1.40071	1.42621	0.0182014	-0.029985	0.571021	0.399837	[-0.1305969]
139	1.435	0.4	-40	-24	0	0	1.04446	1.0125	-0.0319501	0.571137	0.582323	1.95852	0.415822	3.9554	2.80143	2.85629	0.0195852	1.40071	1.42815	0.0195852	-0.0323086	0.571012	0.399824	[-0.1327019]
140	1.435	0.4	-40	-23	0	0	1.04446	1.01017	-0.0342842	0.571137	0.583124	2.09872	0.416966	4.24148	2.80143	2.86022	0.0209872	1.40071	1.43011	0.0209872	-0.034669	0.571003	0.399812	[-0.13476648]
141	1.435	0.4	-40	-22	0	0	1.04446	1.0078	-0.0366541	0.571137	0.583935	2.24067	0.418126	4.53155	2.80143	2.8642	0.0224067	1.40071	1.4321	0.0224067	-0.0370654	0.570994	0.399799	[-0.13679]
142	1.435	0.4	-40	-21	0	0	1.04446	1.0054	-0.0390589	0.571137	0.584755	2.38433	0.419302	4.82551	2.80143	2.86822	0.0238433	1.40071	1.43411	0.0238433	-0.0394972	0.570984	0.399786	[-0.13877186]
143	1.435	0.4	-40	-20	0	0	1.04446	1.00296	-0.0414979	0.571137	0.585585	2.52963	0.420493	5.12325	2.80143	2.87229	0.0252963	1.40071	1.43615	0.0252963	-0.0419635	0.570975	0.399773	[-0.14071145]
144	1.435	0.4	-40	-19	0	0	1.04446	1.00048	-0.0439704	0.571137	0.586424	2.67651	0.421699	5.42466	2.80143	2.87641	0.0267651	1.40071	1.4382	0.0267651	-0.0444638	0.570966	0.39976	[-0.14260818]
145	1.435	0.4	-40	-18	0	0	1.04446	0.997979	-0.0464756	0.571137	0.587271	2.82492	0.422919	5.72965	2.80143	2.88057	0.0282492	1.40071	1.44028	0.0282492	-0.0469971	0.570956	0.399746	[-0.14446147]
146	1.435	0.4	-40	-17	0	0	1.04446	0.995442	-0.0490128	0.571137	0.588127	2.9748	0.424152	6.0381	2.80143	2.88477	0.029748	1.40071	1.44238	0.029748	-0.0495628	0.570947	0.399733	[-0.14627075]
147	1.435	0.4	-40	-16	0	0	1.04446	0.992874	-0.0515812	0.571137	0.588992	3.1261	0.4254	6.34992	2.80143	2.889	0.031261	1.40071	1.4445	0.031261	-0.05216	0.570937	0.399719	[-0.14803548]
148	1.435	0.4	-40	-15	0	0	1.04446	0.990275	-0.0541799	0.571137	0.589863	3.27874	0.42666	6.66499	2.80143	2.89328	0.0327874	1.40071	1.44664	0.0327874	-0.0547879	0.570927	0.399706	[-0.14975511]
149	1.435	0.4	-40	-14	0	0	1.04446	0.987647	-0.0568083	0.571137	0.590743	3.43269	0.427933	6.98321	2.80143	2.89759	0.0343269	1.40071	1.4488	0.0343269	-0.0574458	0.570917	0.399692	[-0.15142913]
150	1.435	0.4	-40	-13	0	0	1.04446	0.98499	-0.0594655	0.571137	0.591629	3.58787	0.429218	7.30446	2.80143	2.90194	0.0358787	1.40071	1.45097	0.0358787	-0.0601328	0.570907	0.399678	[-0.15305702]
151	1.435	0.4	-40	-12	0	0	1.04446	0.982304	-0.0621508	0.571137	0.592522	3.74423	0.430515	7.62865	2.80143	2.90632	0.0374423	1.40071	1.45316	0.0374423	-0.0628482	0.570897	0.399664	[-0.15463828]
152	1.435	0.4	-40	-11	0	0	1.04446	0.979592	-0.0648632	0.571137	0.593421	3.90171	0.431823	7.95566	2.80143	2.91073	0.0390171	1.40071	1.45537	0.0390171	-0.065591	0.570887	0.39965	[-0.15617245]
153	1.435	0.4	-40	-10	0	0	1.04446	0.976853	-0.0676019	0.571137	0.594327	4.06026	0.433142	8.28538	2.80143	2.91517	0.0406026	1.40071	1.45759	0.0406026	-0.0683605	0.570877	0.399636	[-0.15765904]
154	1.435	0.4	-40	-9	0	0	1.04446	0.974089	-0.0703662	0.571137	0.595238	4.21982	0.434471	8.61771	2.80143	2.91964	0.0421982	1.40071	1.45982	0.0421982	-0.0711558	0.570867	0.399621	[-0.15909761]
155	1.435	0.4	-40	-8	0	0	1.04446	0.9713	-0.0731552	0.571137	0.596155	4.38033	0.43581	8.95253	2.80143	2.92414	0.0438033	1.40071	1.46207	0.0438033	-0.0739761	0.570857	0.399607	[-0.16048771]
156	1.435	0.4	-40	-7	0	0	1.04446	0.968487	-0.075968	0.571137	0.597077	4.54173	0.437159	9.28973	2.80143	2.92866	0.0454173	1.40071	1.46433	0.0454173	-0.0768205	0.570846	0.399592	[-0.16182893]
157	1.435	0.4	-40	-6	0	0	1.04446	0.965651	-0.0788038	0.571137	0.598003	4.70397	0.438517	9.6292	2.80143	2.93321	0.0470397	1.40071	1.4666	0.0470397	-0.0796881	0.570836	0.399578	[-0.16312085]
158	1.435	0.4	-40	-5	0	0	1.04446	0.962793	-0.0816617	0.571137	0.598934	4.86698	0.439883	9.97084	2.80143	2.93777	0.0486698	1.40071	1.46889	0.0486698	-0.082578	0.570825	0.399563	[-0.16436309]
159	1.435	0.4	-40	-4	0	0	1.04446	0.959914	-0.0845409	0.571137	0.59987	5.03072	0.441258	10.3145	2.80143	2.94236	0.0503072	1.40071	1.47118	0.0503072	-0.0854895	0.570815	0.399549	[-0.16555526]
160	1.435	0.4	-40	-3	0	0	1.04446	0.957015	-0.0874404	0.571137	0.600809	5.19513	0.442641	10.6602	2.80143	2.94697	0.0519513	1.40071	1.47348	0.0519513	-0.0884216	0.570804	0.399534	[-0.166697]
161	1.435	0.4	-40	-2	0	0	1.04446	0.954096	-0.0903594	0.571137	0.601751	5.36015	0.44403	11.0076	2.80143	2.95159	0.0536015	1.40071	1.47579	0.0536015	-0.0913733	0.570794	0.399519	[-0.16778796]
162	1.435	0.4	-40	-1	0	0	1.04446	0.951158	-0.093297	0.571137	0.602697	5.52573	0.445427	11.3568	2.80143	2.95623	0.0552573	1.40071	1.47811	0.0552573	-0.0943439	0.570783	0.399504	[-0.16882781]
163	1.435	0.4	-40	0	0	0	1.04446	0.948203	-0.0962523	0.571137	0.603645	5.6918	0.44683	11.7076	2.80143	2.96088	0.056918	1.40071	1.48044	0.056918	-0.0973324	0.570772	0.399489	[-0.16981624]
164	1.7095	0.1	-40	-40	0	0	1.24425	1.24425	0	0.285569	0.285569	0	0.1	-1.38778e-14	1.40071	1.40071	0	0.700357	0.700357	0	0	0.285569	0.1	[-0.11273741]
165	1.7095	0.1	-40	-39	0	0	1.24425	1.24225	-0.00199501	0.285569	0.286986	0.496289	0.100995	0.995042	1.40071	1.40767	0.00496289	0.700357	0.703833	0.00496289	-0.0020174	0.285553	0.0999889	[-0.11586809]
166	1.7095	0.1	-40	-38	0	0	1.24425	1.2402	-0.00404435	0.285569	0.288427	1.00107	0.102012	2.01216	1.40071	1.41474	0.0100107	0.700357	0.707368	0.0100107	-0.00408974	0.285537	0.0999775	[-0.11896349]
167	1.7095	0.1	-40	-37	0	0	1.24425	1.2381	-0.00614741	0.285569	0.289892	1.51393	0.103051	3.05078	1.40071	1.42192	0.0151393	0.700357	0.71096	0.0151393	-0.00621639	0.28552	0.099966	[-0.12202264]
168	1.7095	0.1	-40	-36	0	0	1.24425	1.23594	-0.00830353	0.285569	0.291378	2.03449	0.10411	4.11037	1.40071	1.42921	0.0203449	0.700357	0.714606	0.0203449	-0.00839671	0.285503	0.0999543	[-0.12504463]
169	1.7095	0.1	-40	-35	0	0	1.24425	1.23374	-0.0105121	0.285569	0.292886	2.56236	0.10519	5.19038	1.40071	1.43661	0.0256236	0.700357	0.718303	0.0256236	-0.01063	0.285487	0.0999425	[-0.12802852]
170	1.7095	0.1	-40	-34	0	0	1.24425	1.23148	-0.0127723	0.285569	0.294413	3.09716	0.10629	6.29025	1.40071	1.4441	0.0309716	0.700357	0.722048	0.0309716	-0.0129157	0.285469	0.0999305	[-0.13097342]
171	1.7095	0.1	-40	-33	0	0	1.24425	1.22916	-0.0150837	0.285569	0.295959	3.63853	0.107409	7.40945	1.40071	1.45168	0.0363853	0.700357	0.72584	0.0363853	-0.0152529	0.285452	0.0999184	[-0.13387842]
172	1.7095	0.1	-40	-32	0	0	1.24425	1.2268	-0.0174453	0.285569	0.297523	4.1861	0.108547	8.54744	1.40071	1.45935	0.041861	0.700357	0.729675	0.041861	-0.0176411	0.285434	0.0999061	[-0.13674264]
173	1.7095	0.1	-40	-31	0	0	1.24425	1.22439	-0.0198566	0.285569	0.299103	4.73953	0.109704	9.70369	1.40071	1.4671	0.0473953	0.700357	0.733551	0.0473953	-0.0200795	0.285417	0.0998937	[-0.13956521]
174	1.7095	0.1	-40	-30	0	0	1.24425	1.22193	-0.0223168	0.285569	0.300699	5.29847	0.110878	10.8777	1.40071	1.47493	0.0529847	0.700357	0.737465	0.0529847	-0.0225673	0.285399	0.0998811	[-0.14234526]
175	1.7095	0.1	-40	-29	0	0	1.24425	1.21942	-0.0248252	0.285569	0.30231	5.8626	0.112069	12.0689	1.40071	1.48283	0.058626	0.700357	0.741416	0.058626	-0.0251037	0.285381	0.0998685	[-0.14508196]
176	1.7095	0.1	-40	-28	0	0	1.24425	1.21687	-0.0273809	0.285569	0.303935	6.43157	0.113277	13.2768	1.40071	1.4908	0.0643157	0.700357	0.745401	0.0643157	-0.0276881	0.285363	0.0998557	[-0.14777446]
177	1.7095	0.1	-40	-27	0	0	1.24425	1.21426	-0.0299832	0.285569	0.305573	7.00509	0.114501	14.5009	1.40071	1.49884	0.0700509	0.700357	0.749418	0.0700509	-0.0303197	0.285344	0.0998429	[-0.15042195]
178	1.7095	0.1	-40	-26	0	0	1.24425	1.21162	-0.0326314	0.285569	0.307223	7.58284	0.115741	15.7407	1.40071	1.50693	0.0758284	0.700357	0.753464	0.0758284	-0.0329975	0.285326	0.0998299	[-0.15302362]
179	1.7095	0.1	-40	-25	0	0	1.24425	1.20892	-0.0353245	0.285569	0.308884	8.16453	0.116996	16.9956	1.40071	1.51508	0.0816453	0.700357	0.757538	0.0816453	-0.0357209	0.285307	0.0998169	[-0.15557867]
180	1.7095	0.1	-40	-24	0	0	1.24425	1.20619	-0.0380618	0.285569	0.310555	8.74985	0.118265	18.2653	1.40071	1.52327	0.0874985	0.700357	0.761637	0.0874985	-0.0384889	0.285288	0.0998037	[-0.15808634]
181	1.7095	0.1	-40	-23	0	0	1.24425	1.20341	-0.0408425	0.285569	0.312237	9.33853	0.119549	19.5491	1.40071	1.53152	0.0933853	0.700357	0.76576	0.0933853	-0.0413007	0.285269	0.0997905	[-0.16054585]
182	1.7095	0.1	-40	-22	0	0	1.24425	1.20058	-0.0436656	0.285569	0.313926	9.9303	0.120847	20.8467	1.40071	1.53981	0.099303	0.700357	0.769905	0.099303	-0.0441556	0.28525	0.0997773	[-0.16295645]
183	1.7095	0.1	-40	-21	0	0	1.24425	1.19772	-0.0465304	0.285569	0.315624	10.5249	0.122157	22.1575	1.40071	1.54814	0.105249	0.700357	0.774069	0.105249	-0.0470525	0.285231	0.0997639	[-0.16531742]
184	1.7095	0.1	-40	-20	0	0	1.24425	1.19481	-0.049436	0.285569	0.31733	11.122	0.123481	23.481	1.40071	1.5565	0.11122	0.700357	0.778251	0.11122	-0.0499907	0.285212	0.0997506	[-0.16762803]
185	1.7095	0.1	-40	-19	0	0	1.24425	1.19187	-0.0523814	0.285569	0.319041	11.7214	0.124817	24.8168	1.40071	1.5649	0.117214	0.700357	0.782449	0.117214	-0.0529692	0.285193	0.0997371	[-0.16988758]
186	1.7095	0.1	-40	-18	0	0	1.24425	1.18888	-0.0553659	0.285569	0.320759	12.3229	0.126164	26.1644	1.40071	1.57332	0.123229	0.700357	0.786662	0.123229	-0.0559871	0.285174	0.0997236	[-0.17209538]
187	1.7095	0.1	-40	-17	0	0	1.24425	1.18586	-0.0583884	0.285569	0.322482	12.9262	0.127523	27.5233	1.40071	1.58177	0.129262	0.700357	0.790887	0.129262	-0.0590436	0.285154	0.0997101	[-0.17425076]
188	1.7095	0.1	-40	-16	0	0	1.24425	1.1828	-0.0614481	0.285569	0.324209	13.5311	0.128893	28.8931	1.40071	1.59025	0.135311	0.700357	0.795123	0.135311	-0.0621376	0.285135	0.0996966	[-0.17635306]
189	1.7095	0.1	-40	-15	0	0	1.24425	1.1797	-0.064544	0.285569	0.32594	14.1373	0.130273	30.2733	1.40071	1.59874	0.141373	0.700357	0.799369	0.141373	-0.0652682	0.285116	0.099683	[-0.17840164]
190	1.7095	0.1	-40	-14	0	0	1.24425	1.17657	-0.0676752	0.285569	0.327675	14.7447	0.131664	31.6635	1.40071	1.60725	0.147447	0.700357	0.803623	0.147447	-0.0684345	0.285096	0.0996694	[-0.18039588]
191	1.7095	0.1	-40	-13	0	0	1.24425	1.17341	-0.0708407	0.285569	0.329412	15.353	0.133063	33.0632	1.40071	1.61577	0.15353	0.700357	0.807883	0.15353	-0.0716356	0.285077	0.0996557	[-0.18233517]
192	1.7095	0.1	-40	-12	0	0	1.24425	1.17021	-0.0740395	0.285569	0.331151	15.962	0.134472	34.4719	1.40071	1.6243	0.15962	0.700357	0.812148	0.15962	-0.0748703	0.285057	0.0996421	[-0.18421892]
193	1.7095	0.1	-40	-11	0	0	1.24425	1.16698	-0.0772708	0.285569	0.332892	16.5715	0.135889	35.8892	1.40071	1.63283	0.165715	0.700357	0.816417	0.165715	-0.0781378	0.285038	0.0996284	[-0.18604655]
194	1.7095	0.1	-40	-10	0	0	1.24425	1.16371	-0.0805334	0.285569	0.334633	17.1814	0.137315	37.3147	1.40071	1.64138	0.171814	0.700357	0.820688	0.171814	-0.0814371	0.285018	0.0996148	[-0.18781751]
195	1.7095	0.1	-40	-9	0	0	1.24425	1.16042	-0.0838265	0.285569	0.336375	17.7913	0.138748	38.7479	1.40071	1.64992	0.177913	0.700357	0.82496	0.177913	-0.0847671	0.284999	0.0996011	[-0.18953126]
196	1.7095	0.1	-40	-8	0	0	1.24425	1.1571	-0.087149	0.285569	0.338117	18.4012	0.140188	40.1885	1.40071	1.65846	0.184012	0.700357	0.829231	0.184012	-0.0881269	0.284979	0.0995875	[-0.19118728]
197	1.7095	0.1	-40	-7	0	0	1.24425	1.15375	-0.0904999	0.285569	0.339858	19.0108	0.141636	41.6358	1.40071	1.667	0.190108	0.700357	0.833501	0.190108	-0.0915154	0.284959	0.0995738	[-0.19278506]
198	1.7095	0.1	-40	-6	0	0	1.24425	1.15037	-0.0938781	0.285569	0.341597	19.6201	0.14309	43.0896	1.40071	1.67554	0.196201	0.700357	0.837768	0.196201	-0.0949315	0.28494	0.0995602	[-0.19432411]
199	1.7095	0.1	-40	-5	0	0	1.24425	1.14697	-0.0972827	0.285569	0.343335	20.2287	0.144549	44.5494	1.40071	1.68406	0.202287	0.700357	0.84203	0.202287	-0.0983743	0.28492	0.0995465	[-0.19580397]
200	1.7095	0.1	-40	-4	0	0	1.24425	1.14354	-0.100713	0.285569	0.345071	20.8365	0.146015	46.0147	1.40071	1.69257	0.208365	0.700357	0.846287	0.208365	-0.101843	0.284901	0.0995329	[-0.19722419]
201	1.7095	0.1	-40	-3	0	0	1.24425	1.14008	-0.104167	0.285569	0.346804	21.4435	0.147485	47.4852	1.40071	1.70108	0.214435	0.700357	0.850538	0.214435	-0.105336	0.284881	0.0995193	[-0.19858433]
202	1.7095	0.1	-40	-2	0	0	1.24425	1.1366	-0.107644	0.285569	0.348535	22.0493	0.14896	48.9604	1.40071	1.70956	0.220493	0.700357	0.854781	0.220493	-0.108852	0.284862	0.0995058	[-0.19988398]
203	1.7095	0.1	-40	-1	0	0	1.24425	1.1331	-0.111144	0.285569	0.350261	22.6539	0.15044	50.4399	1.40071	1.71803	0.226539	0.700357	0.859015	0.226539	-0.112391	0.284843	0.0994922	[-0.20112275]
204	1.7095	0.1	-40	0	0	0	1.24425	1.12958	-0.114664	0.285569	0.351984	23.2571	0.151923	51.9232	1.40071	1.72648	0.232571	0.700357	0.86324	0.232571	-0.115951	0.284823	0.0994787	[-0.20230025]
205	1.7095	0.2	-40	-40	0	0	1.24425	1.24425	0	0.403855	0.403855	0	0.2	0	1.98091	1.98091	0	0.990454	0.990454	0	0	0.403855	0.2	[-0.11273741]
206	1.7095	0.2	-40	-39	0	0	1.24425	1.24225	-0.00199501	0.403855	0.40486	0.248757	0.200996	0.498134	1.98091	1.98584	0.00248757	0.990454	0.992918	0.00248757	-0.0020174	0.403844	0.199989	[-0.11586809]
207	1.7095	0.2	-40	-38	0	0	1.24425	1.2402	-0.00404435	0.403855	0.405886	0.503014	0.202017	1.00856	1.98091	1.99087	0.00503014	0.990454	0.995437	0.00503014	-0.00408974	0.403832	0.199977	[-0.11896349]
208	1.7095	0.2	-40	-37	0	0	1.24425	1.2381	-0.00614741	0.403855	0.406935	0.76261	0.203062	1.53104	1.98091	1.99602	0.0076261	0.990454	0.998008	0.0076261	-0.00621639	0.40382	0.199966	[-0.12202264]
209	1.7095	0.2	-40	-36	0	0	1.24425	1.23594	-0.00830353	0.403855	0.408004	1.02739	0.204131	2.06533	1.98091	2.00126	0.0102739	0.990454	1.00063	0.0102739	-0.00839671	0.403808	0.199954	[-0.12504463]
210	1.7095	0.2	-40	-35	0	0	1.24425	1.23374	-0.0105121	0.403855	0.409094	1.29718	0.205222	2.61119	1.98091	2.0066	0.0129718	0.990454	1.0033	0.0129718	-0.01063	0.403796	0.199942	[-0.12802852]
211	1.7095	0.2	-40	-34	0	0	1.24425	1.23148	-0.0127723	0.403855	0.410203	1.57184	0.206337	3.16838	1.98091	2.01205	0.0157184	0.990454	1.00602	0.0157184	-0.0129157	0.403784	0.199929	[-0.13097342]
212	1.7095	0.2	-40	-33	0	0	1.24425	1.22916	-0.0150837	0.403855	0.411331	1.85119	0.207473	3.73665	1.98091	2.01758	0.0185119	0.990454	1.00879	0.0185119	-0.0152529	0.403771	0.199917	[-0.13387842]
213	1.7095	0.2	-40	-32	0	0	1.24425	1.2268	-0.0174453	0.403855	0.412478	2.13508	0.208632	4.31575	1.98091	2.0232	0.0213508	0.990454	1.0116	0.0213508	-0.0176411	0.403758	0.199904	[-0.13674264]
214	1.7095	0.2	-40	-31	0	0	1.24425	1.22439	-0.0198566	0.403855	0.413642	2.42335	0.209811	4.90544	1.98091	2.02891	0.0242335	0.990454	1.01446	0.0242335	-0.0200795	0.403745	0.199891	[-0.13956521]
215	1.7095	0.2	-40	-30	0	0	1.24425	1.22193	-0.0223168	0.403855	0.414823	2.71585	0.211011	5.50545	1.98091	2.03471	0.0271585	0.990454	1.01735	0.0271585	-0.0225673	0.403732	0.199878	[-0.14234526]
216	1.7095	0.2	-40	-29	0	0	1.24425	1.21942	-0.0248252	0.403855	0.416021	3.0124	0.212231	6.11555	1.98091	2.04058	0.030124	0.990454	1.02029	0.030124	-0.0251037	0.403719	0.199865	[-0.14508196]
217	1.7095	0.2	-40	-28	0	0	1.24425	1.21687	-0.0273809	0.403855	0.417234	3.31286	0.213471	6.73547	1.98091	2.04653	0.0331286	0.990454	1.02327	0.0331286	-0.0276881	0.403705	0.199851	[-0.14777446]
218	1.7095	0.2	-40	-27	0	0	1.24425	1.21426	-0.0299832	0.403855	0.418463	3.61707	0.21473	7.36497	1.98091	2.05256	0.0361707	0.990454	1.02628	0.0361707	-0.0303197	0.403691	0.199838	[-0.15042195]
219	1.7095	0.2	-40	-26	0	0	1.24425	1.21162	-0.0326314	0.403855	0.419706	3.92487	0.216008	8.00379	1.98091	2.05866	0.0392487	0.990454	1.02933	0.0392487	-0.0329975	0.403677	0.199824	[-0.15302362]
220	1.7095	0.2	-40	-25	0	0	1.24425	1.20892	-0.0353245	0.403855	0.420963	4.23611	0.217303	8.65167	1.98091	2.06482	0.0423611	0.990454	1.03241	0.0423611	-0.0357209	0.403663	0.19981	[-0.15557867]
221	1.7095	0.2	-40	-24	0	0	1.24425	1.20619	-0.0380618	0.403855	0.422233	4.55064	0.218617	9.30837	1.98091	2.07105	0.0455064	0.990454	1.03553	0.0455064	-0.0384889	0.403649	0.199796	[-0.15808634]
222	1.7095	0.2	-40	-23	0	0	1.24425	1.20341	-0.0408425	0.403855	0.423516	4.8683	0.219947	9.97361	1.98091	2.07735	0.048683	0.990454	1.03867	0.048683	-0.0413007	0.403634	0.199782	[-0.16054585]
223	1.7095	0.2	-40	-22	0	0	1.24425	1.20058	-0.0436656	0.403855	0.424811	5.18895	0.221294	10.6472	1.98091	2.0837	0.0518895	0.990454	1.04185	0.0518895	-0.0441556	0.40362	0.199767	[-0.16295645]
224	1.7095	0.2	-40	-21	0	0	1.24425	1.19772	-0.0465304	0.403855	0.426117	5.51243	0.222657	11.3287	1.98091	2.09011	0.0551243	0.990454	1.04505	0.0551243	-0.0470525	0.403605	0.199753	[-0.16531742]
225	1.7095	0.2	-40	-20	0	0	1.24425	1.19481	-0.049436	0.403855	0.427435	5.83861	0.224036	12.0181	1.98091	2.09657	0.0583861	0.990454	1.04828	0.0583861	-0.0499907	0.40359	0.199738	[-0.16762803]
226	1.7095	0.2	-40	-19	0	0	1.24425	1.19187	-0.0523814	0.403855	0.428762	6.16732	0.22543	12.715	1.98091	2.10308	0.0616732	0.990454	1.05154	0.0616732	-0.0529692	0.403576	0.199723	[-0.16988758]
227	1.7095	0.2	-40	-18	0	0	1.24425	1.18888	-0.0553659	0.403855	0.430099	6.49844	0.226838	13.4192	1.98091	2.10964	0.0649844	0.990454	1.05482	0.0649844	-0.0559871	0.403561	0.199708	[-0.17209538]
228	1.7095	0.2	-40	-17	0	0	1.24425	1.18586	-0.0583884	0.403855	0.431446	6.83181	0.228261	14.1304	1.98091	2.11624	0.0683181	0.990454	1.05812	0.0683181	-0.0590436	0.403545	0.199693	[-0.17425076]
229	1.7095	0.2	-40	-16	0	0	1.24425	1.1828	-0.0614481	0.403855	0.432801	7.16731	0.229697	14.8483	1.98091	2.12289	0.0716731	0.990454	1.06144	0.0716731	-0.0621376	0.40353	0.199678	[-0.17635306]
230	1.7095	0.2	-40	-15	0	0	1.24425	1.1797	-0.064544	0.403855	0.434163	7.50478	0.231146	15.5728	1.98091	2.12957	0.0750478	0.990454	1.06479	0.0750478	-0.0652682	0.403515	0.199663	[-0.17840164]
231	1.7095	0.2	-40	-14	0	0	1.24425	1.17657	-0.0676752	0.403855	0.435534	7.8441	0.232607	16.3035	1.98091	2.13629	0.078441	0.990454	1.06815	0.078441	-0.0684345	0.4035	0.199648	[-0.18039588]
232	1.7095	0.2	-40	-13	0	0	1.24425	1.17341	-0.0708407	0.403855	0.436911	8.18512	0.23408	17.0402	1.98091	2.14305	0.0818512	0.990454	1.07152	0.0818512	-0.0716356	0.403484	0.199633	[-0.18233517]
233	1.7095	0.2	-40	-12	0	0	1.24425	1.17021	-0.0740395	0.403855	0.438295	8.52772	0.235565	17.7827	1.98091	2.14984	0.0852772	0.990454	1.07492	0.0852772	-0.0748703	0.403469	0.199617	[-0.18421892]
234	1.7095	0.2	-40	-11	0	0	1.24425	1.16698	-0.0772708	0.403855	0.439684	8.87177	0.237061	18.5306	1.98091	2.15665	0.0887177	0.990454	1.07833	0.0887177	-0.0781378	0.403453	0.199602	[-0.18604655]
235	1.7095	0.2	-40	-10	0	0	1.24425	1.16371	-0.0805334	0.403855	0.441079	9.21713	0.238568	19.2838	1.98091	2.16349	0.0921713	0.990454	1.08175	0.0921713	-0.0814371	0.403437	0.199587	[-0.18781751]
236	1.7095	0.2	-40	-9	0	0	1.24425	1.16042	-0.0838265	0.403855	0.442478	9.56368	0.240084	20.042	1.98091	2.17036	0.0956368	0.990454	1.08518	0.0956368	-0.0847671	0.403422	0.199571	[-0.18953126]
237	1.7095	0.2	-40	-8	0	0	1.24425	1.1571	-0.087149	0.403855	0.443882	9.91129	0.24161	20.8049	1.98091	2.17724	0.0991129	0.990454	1.08862	0.0991129	-0.0881269	0.403406	0.199555	[-0.19118728]
238	1.7095	0.2	-40	-7	0	0	1.24425	1.15375	-0.0904999	0.403855	0.44529	10.2598	0.243145	21.5723	1.98091	2.18415	0.102598	0.990454	1.09207	0.102598	-0.0915154	0.40339	0.19954	[-0.19278506]
239	1.7095	0.2	-40	-6	0	0	1.24425	1.15037	-0.0938781	0.403855	0.446701	10.6092	0.244688	22.344	1.98091	2.19107	0.106092	0.990454	1.09553	0.106092	-0.0949315	0.403374	0.199524	[-0.19432411]
240	1.7095	0.2	-40	-5	0	0	1.24425	1.14697	-0.0972827	0.403855	0.448115	10.9593	0.246239	23.1196	1.98091	2.198	0.109593	0.990454	1.099	0.109593	-0.0983743	0.403358	0.199508	[-0.19580397]
241	1.7095	0.2	-40	-4	0	0	1.24425	1.14354	-0.100713	0.403855	0.449531	11.3099	0.247798	23.899	1.98091	2.20495	0.113099	0.990454	1.10247	0.113099	-0.101843	0.403342	0.199493	[-0.19722419]
242	1.7095	0.2	-40	-3	0	0	1.24425	1.14008	-0.104167	0.403855	0.450949	11.661	0.249364	24.6819	1.98091	2.2119	0.11661	0.990454	1.10595	0.11661	-0.105336	0.403327	0.199477	[-0.19858433]
243	1.7095	0.2	-40	-2	0	0	1.24425	1.1366	-0.107644	0.403855	0.452368	12.0125	0.250936	25.468	1.98091	2.21887	0.120125	0.990454	1.10943	0.120125	-0.108852	0.403311	0.199461	[-0.19988398]
244	1.7095	0.2	-40	-1	0	0	1.24425	1.1331	-0.111144	0.403855	0.453789	12.3642	0.252514	26.2572	1.98091	2.22583	0.123642	0.990454	1.11292	0.123642	-0.112391	0.403295	0.199445	[-0.20112275]
245	1.7095	0.2	-40	0	0	0	1.24425	1.12958	-0.114664	0.403855	0.455209	12.7161	0.254098	27.0491	1.98091	2.2328	0.127161	0.990454	1.1164	0.127161	-0.115951	0.403279	0.19943	[-0.20230025]
246	1.7095	0.3	-40	-40	0	0	1.24425	1.24425	0	0.494619	0.494619	1.1223e-14	0.3	1.85037e-14	2.42611	2.42611	0	1.21305	1.21305	0	0	0.494619	0.3	[-0.11273741]
247	1.7095	0.3	-40	-39	0	0	1.24425	1.24225	-0.00199501	0.494619	0.49544	0.165975	0.300997	0.332226	2.42611	2.43013	0.00165975	1.21305	1.21507	0.00165975	-0.0020174	0.49461	0.299989	[-0.11586809]
248	1.7095	0.3	-40	-38	0	0	1.24425	1.2402	-0.00404435	0.494619	0.496281	0.335901	0.302019	0.672931	2.42611	2.43426	0.00335901	1.21305	1.21713	0.00335901	-0.00408974	0.494601	0.299977	[-0.11896349]
249	1.7095	0.3	-40	-37	0	0	1.24425	1.2381	-0.00614741	0.494619	0.49714	0.509686	0.303066	1.02197	2.42611	2.43847	0.00509686	1.21305	1.21924	0.00509686	-0.00621639	0.494591	0.299966	[-0.12202264]
250	1.7095	0.3	-40	-36	0	0	1.24425	1.23594	-0.00830353	0.494619	0.498019	0.687238	0.304138	1.3792	2.42611	2.44278	0.00687238	1.21305	1.22139	0.00687238	-0.00839671	0.494581	0.299954	[-0.12504463]
251	1.7095	0.3	-40	-35	0	0	1.24425	1.23374	-0.0105121	0.494619	0.498915	0.868463	0.305233	1.74447	2.42611	2.44718	0.00868463	1.21305	1.22359	0.00868463	-0.01063	0.494571	0.299942	[-0.12802852]
252	1.7095	0.3	-40	-34	0	0	1.24425	1.23148	-0.0127723	0.494619	0.499829	1.05327	0.306353	2.11763	2.42611	2.45166	0.0105327	1.21305	1.22583	0.0105327	-0.0129157	0.494561	0.299929	[-0.13097342]
253	1.7095	0.3	-40	-33	0	0	1.24425	1.22916	-0.0150837	0.494619	0.50076	1.24156	0.307496	2.49853	2.42611	2.45623	0.0124156	1.21305	1.22811	0.0124156	-0.0152529	0.49455	0.299916	[-0.13387842]
254	1.7095	0.3	-40	-32	0	0	1.24425	1.2268	-0.0174453	0.494619	0.501708	1.43324	0.308661	2.88702	2.42611	2.46088	0.0143324	1.21305	1.23044	0.0143324	-0.0176411	0.49454	0.299904	[-0.13674264]
255	1.7095	0.3	-40	-31	0	0	1.24425	1.22439	-0.0198566	0.494619	0.502673	1.62821	0.309849	3.28293	2.42611	2.46561	0.0162821	1.21305	1.23281	0.0162821	-0.0200795	0.494529	0.29989	[-0.13956521]
256	1.7095	0.3	-40	-30	0	0	1.24425	1.22193	-0.0223168	0.494619	0.503653	1.82638	0.311058	3.68612	2.42611	2.47042	0.0182638	1.21305	1.23521	0.0182638	-0.0225673	0.494518	0.299877	[-0.14234526]
257	1.7095	0.3	-40	-29	0	0	1.24425	1.21942	-0.0248252	0.494619	0.504649	2.02765	0.312289	4.09642	2.42611	2.4753	0.0202765	1.21305	1.23765	0.0202765	-0.0251037	0.494507	0.299864	[-0.14508196]
258	1.7095	0.3	-40	-28	0	0	1.24425	1.21687	-0.0273809	0.494619	0.505659	2.23193	0.313541	4.51367	2.42611	2.48026	0.0223193	1.21305	1.24013	0.0223193	-0.0276881	0.494495	0.29985	[-0.14777446]
259	1.7095	0.3	-40	-27	0	0	1.24425	1.21426	-0.0299832	0.494619	0.506684	2.43911	0.314813	4.93771	2.42611	2.48528	0.0243911	1.21305	1.24264	0.0243911	-0.0303197	0.494484	0.299836	[-0.15042195]
260	1.7095	0.3	-40	-26	0	0	1.24425	1.21162	-0.0326314	0.494619	0.507722	2.6491	0.316105	5.36838	2.42611	2.49038	0.026491	1.21305	1.24519	0.026491	-0.0329975	0.494472	0.299822	[-0.15302362]
261	1.7095	0.3	-40	-25	0	0	1.24425	1.20892	-0.0353245	0.494619	0.508774	2.86181	0.317417	5.80551	2.42611	2.49554	0.0286181	1.21305	1.24777	0.0286181	-0.0357209	0.494461	0.299807	[-0.15557867]
262	1.7095	0.3	-40	-24	0	0	1.24425	1.20619	-0.0380618	0.494619	0.509839	3.07713	0.318747	6.24895	2.42611	2.50076	0.0307713	1.21305	1.25038	0.0307713	-0.0384889	0.494449	0.299793	[-0.15808634]
263	1.7095	0.3	-40	-23	0	0	1.24425	1.20341	-0.0408425	0.494619	0.510917	3.29497	0.320096	6.69851	2.42611	2.50605	0.0329497	1.21305	1.25302	0.0329497	-0.0413007	0.494436	0.299778	[-0.16054585]
264	1.7095	0.3	-40	-22	0	0	1.24425	1.20058	-0.0436656	0.494619	0.512006	3.51523	0.321462	7.15403	2.42611	2.51139	0.0351523	1.21305	1.2557	0.0351523	-0.0441556	0.494424	0.299763	[-0.16295645]
265	1.7095	0.3	-40	-21	0	0	1.24425	1.19772	-0.0465304	0.494619	0.513107	3.73782	0.322846	7.61536	2.42611	2.51679	0.0373782	1.21305	1.2584	0.0373782	-0.0470525	0.494412	0.299748	[-0.16531742]
266	1.7095	0.3	-40	-20	0	0	1.24425	1.19481	-0.049436	0.494619	0.514219	3.96264	0.324247	8.08231	2.42611	2.52225	0.0396264	1.21305	1.26112	0.0396264	-0.0499907	0.494399	0.299733	[-0.16762803]
267	1.7095	0.3	-40	-19	0	0	1.24425	1.19187	-0.0523814	0.494619	0.515342	4.18959	0.325664	8.55471	2.42611	2.52775	0.0418959	1.21305	1.26388	0.0418959	-0.0529692	0.494387	0.299718	[-0.16988758]
268	1.7095	0.3	-40	-18	0	0	1.24425	1.18888	-0.0553659	0.494619	0.516475	4.41858	0.327097	9.03241	2.42611	2.53331	0.0441858	1.21305	1.26665	0.0441858	-0.0559871	0.494374	0.299703	[-0.17209538]
269	1.7095	0.3	-40	-17	0	0	1.24425	1.18586	-0.0583884	0.494619	0.517617	4.64952	0.328546	9.51522	2.42611	2.53891	0.0464952	1.21305	1.26946	0.0464952	-0.0590436	0.494361	0.299687	[-0.17425076]
270	1.7095	0.3	-40	-16	0	0	1.24425	1.1828	-0.0614481	0.494619	0.518768	4.8823	0.330009	10.003	2.42611	2.54456	0.048823	1.21305	1.27228	0.048823	-0.0621376	0.494348	0.299671	[-0.17635306]
271	1.7095	0.3	-40	-15	0	0	1.24425	1.1797	-0.064544	0.494619	0.519928	5.11684	0.331487	10.4955	2.42611	2.55025	0.0511684	1.21305	1.27512	0.0511684	-0.0652682	0.494335	0.299656	[-0.17840164]
272	1.7095	0.3	-40	-14	0	0	1.24425	1.17657	-0.0676752	0.494619	0.521097	5.35305	0.332978	10.9926	2.42611	2.55598	0.0535305	1.21305	1.27799	0.0535305	-0.0684345	0.494322	0.29964	[-0.18039588]
273	1.7095	0.3	-40	-13	0	0	1.24425	1.17341	-0.0708407	0.494619	0.522273	5.59082	0.334483	11.4942	2.42611	2.56175	0.0559082	1.21305	1.28087	0.0559082	-0.0716356	0.494309	0.299624	[-0.18233517]
274	1.7095	0.3	-40	-12	0	0	1.24425	1.17021	-0.0740395	0.494619	0.523456	5.83006	0.336	12	2.42611	2.56755	0.0583006	1.21305	1.28378	0.0583006	-0.0748703	0.494296	0.299608	[-0.18421892]
275	1.7095	0.3	-40	-11	0	0	1.24425	1.16698	-0.0772708	0.494619	0.524646	6.0707	0.33753	12.5099	2.42611	2.57339	0.060707	1.21305	1.28669	0.060707	-0.0781378	0.494282	0.299591	[-0.18604655]
276	1.7095	0.3	-40	-10	0	0	1.24425	1.16371	-0.0805334	0.494619	0.525843	6.31263	0.339071	13.0237	2.42611	2.57926	0.0631263	1.21305	1.28963	0.0631263	-0.0814371	0.494269	0.299575	[-0.18781751]
277	1.7095	0.3	-40	-9	0	0	1.24425	1.16042	-0.0838265	0.494619	0.527045	6.55576	0.340624	13.5413	2.42611	2.58516	0.0655576	1.21305	1.29258	0.0655576	-0.0847671	0.494256	0.299559	[-0.18953126]
278	1.7095	0.3	-40	-8	0	0	1.24425	1.1571	-0.087149	0.494619	0.528254	6.80001	0.342187	14.0624	2.42611	2.59108	0.0680001	1.21305	1.29554	0.0680001	-0.0881269	0.494242	0.299542	[-0.19118728]
279	1.7095	0.3	-40	-7	0	0	1.24425	1.15375	-0.0904999	0.494619	0.529467	7.04529	0.343761	14.587	2.42611	2.59703	0.0704529	1.21305	1.29852	0.0704529	-0.0915154	0.494228	0.299526	[-0.19278506]
280	1.7095	0.3	-40	-6	0	0	1.24425	1.15037	-0.0938781	0.494619	0.530685	7.29152	0.345344	15.1147	2.42611	2.60301	0.0729152	1.21305	1.3015	0.0729152	-0.0949315	0.494215	0.299509	[-0.19432411]
281	1.7095	0.3	-40	-5	0	0	1.24425	1.14697	-0.0972827	0.494619	0.531907	7.53859	0.346936	15.6455	2.42611	2.609	0.0753859	1.21305	1.3045	0.0753859	-0.0983743	0.494201	0.299493	[-0.19580397]
282	1.7095	0.3	-40	-4	0	0	1.24425	1.14354	-0.100713	0.494619	0.533133	7.78643	0.348537	16.1792	2.42611	2.61502	0.0778643	1.21305	1.30751	0.0778643	-0.101843	0.494187	0.299476	[-0.19722419]
283	1.7095	0.3	-40	-3	0	0	1.24425	1.14008	-0.104167	0.494619	0.534362	8.03496	0.350147	16.7155	2.42611	2.62104	0.0803496	1.21305	1.31052	0.0803496	-0.105336	0.494173	0.299459	[-0.19858433]
284	1.7095	0.3	-40	-2	0	0	1.24425	1.1366	-0.107644	0.494619	0.535594	8.28409	0.351763	17.2544	2.42611	2.62709	0.0828409	1.21305	1.31354	0.0828409	-0.108852	0.49416	0.299443	[-0.19988398]
285	1.7095	0.3	-40	-1	0	0	1.24425	1.1331	-0.111144	0.494619	0.536829	8.53373	0.353387	17.7957	2.42611	2.63315	0.0853373	1.21305	1.31657	0.0853373	-0.112391	0.494146	0.299426	[-0.20112275]
286	1.7095	0.3	-40	0	0	0	1.24425	1.12958	-0.114664	0.494619	0.538066	8.78381	0.355018	18.3392	2.42611	2.63921	0.0878381	1.21305	1.31961	0.0878381	-0.115951	0.494132	0.299409	[-0.20230025]
287	1.7095	0.4	-40	-40	0	0	1.24425	1.24425	0	0.571137	0.571137	0	0.4	-1.38778e-14	2.80143	2.80143	0	1.40071	1.40071	0	0	0.571137	0.4	[-0.11273741]
288	1.7095	0.4	-40	-39	0	0	1.24425	1.24225	-0.00199501	0.571137	0.571849	0.124533	0.400997	0.249221	2.80143	2.80492	0.00124533	1.40071	1.40246	0.00124533	-0.0020174	0.571129	0.399989	[-0.11586809]
289	1.7095	0.4	-40	-38	0	0	1.24425	1.2402	-0.00404435	0.571137	0.572577	0.252136	0.40202	0.504909	2.80143	2.80849	0.00252136	1.40071	1.40425	0.00252136	-0.00408974	0.571121	0.399977	[-0.11896349]
290	1.7095	0.4	-40	-37	0	0	1.24425	1.2381	-0.00614741	0.571137	0.573323	0.382748	0.403068	0.766961	2.80143	2.81215	0.00382748	1.40071	1.40608	0.00382748	-0.00621639	0.571113	0.399966	[-0.12202264]
291	1.7095	0.4	-40	-36	0	0	1.24425	1.23594	-0.00830353	0.571137	0.574086	0.516305	0.404141	1.03528	2.80143	2.81589	0.00516305	1.40071	1.40795	0.00516305	-0.00839671	0.571104	0.399954	[-0.12504463]
292	1.7095	0.4	-40	-35	0	0	1.24425	1.23374	-0.0105121	0.571137	0.574865	0.652743	0.405239	1.30975	2.80143	2.81971	0.00652743	1.40071	1.40986	0.00652743	-0.01063	0.571095	0.399941	[-0.12802852]
293	1.7095	0.4	-40	-34	0	0	1.24425	1.23148	-0.0127723	0.571137	0.575661	0.791999	0.406361	1.59027	2.80143	2.82362	0.00791999	1.40071	1.41181	0.00791999	-0.0129157	0.571086	0.399929	[-0.13097342]
294	1.7095	0.4	-40	-33	0	0	1.24425	1.22916	-0.0150837	0.571137	0.576472	0.934006	0.407507	1.87674	2.80143	2.82759	0.00934006	1.40071	1.4138	0.00934006	-0.0152529	0.571077	0.399916	[-0.13387842]
295	1.7095	0.4	-40	-32	0	0	1.24425	1.2268	-0.0174453	0.571137	0.577298	1.0787	0.408676	2.16903	2.80143	2.83165	0.010787	1.40071	1.41582	0.010787	-0.0176411	0.571068	0.399903	[-0.13674264]
296	1.7095	0.4	-40	-31	0	0	1.24425	1.22439	-0.0198566	0.571137	0.578139	1.22601	0.409868	2.46705	2.80143	2.83577	0.0122601	1.40071	1.41789	0.0122601	-0.0200795	0.571059	0.39989	[-0.13956521]
297	1.7095	0.4	-40	-30	0	0	1.24425	1.22193	-0.0223168	0.571137	0.578995	1.37587	0.411083	2.77067	2.80143	2.83997	0.0137587	1.40071	1.41999	0.0137587	-0.0225673	0.571049	0.399877	[-0.14234526]
298	1.7095	0.4	-40	-29	0	0	1.24425	1.21942	-0.0248252	0.571137	0.579865	1.52822	0.412319	3.07979	2.80143	2.84424	0.0152822	1.40071	1.42212	0.0152822	-0.0251037	0.571039	0.399863	[-0.14508196]
299	1.7095	0.4	-40	-28	0	0	1.24425	1.21687	-0.0273809	0.571137	0.580749	1.68298	0.413577	3.39429	2.80143	2.84858	0.0168298	1.40071	1.42429	0.0168298	-0.0276881	0.571029	0.399849	[-0.14777446]
300	1.7095	0.4	-40	-27	0	0	1.24425	1.21426	-0.0299832	0.571137	0.581647	1.84009	0.414856	3.71404	2.80143	2.85298	0.0184009	1.40071	1.42649	0.0184009	-0.0303197	0.571019	0.399835	[-0.15042195]
301	1.7095	0.4	-40	-26	0	0	1.24425	1.21162	-0.0326314	0.571137	0.582557	1.99948	0.416156	4.03894	2.80143	2.85744	0.0199948	1.40071	1.42872	0.0199948	-0.0329975	0.571009	0.399821	[-0.15302362]
302	1.7095	0.4	-40	-25	0	0	1.24425	1.20892	-0.0353245	0.571137	0.58348	2.16108	0.417475	4.36886	2.80143	2.86197	0.0216108	1.40071	1.43098	0.0216108	-0.0357209	0.570999	0.399806	[-0.15557867]
303	1.7095	0.4	-40	-24	0	0	1.24425	1.20619	-0.0380618	0.571137	0.584415	2.32481	0.418815	4.70368	2.80143	2.86656	0.0232481	1.40071	1.43328	0.0232481	-0.0384889	0.570988	0.399791	[-0.15808634]
304	1.7095	0.4	-40	-23	0	0	1.24425	1.20341	-0.0408425	0.571137	0.585362	2.49062	0.420173	5.04328	2.80143	2.8712	0.0249062	1.40071	1.4356	0.0249062	-0.0413007	0.570978	0.399776	[-0.16054585]
305	1.7095	0.4	-40	-22	0	0	1.24425	1.20058	-0.0436656	0.571137	0.586321	2.65843	0.42155	5.38753	2.80143	2.8759	0.0265843	1.40071	1.43795	0.0265843	-0.0441556	0.570967	0.399761	[-0.16295645]
306	1.7095	0.4	-40	-21	0	0	1.24425	1.19772	-0.0465304	0.571137	0.58729	2.82817	0.422945	5.73632	2.80143	2.88066	0.0282817	1.40071	1.44033	0.0282817	-0.0470525	0.570956	0.399746	[-0.16531742]
307	1.7095	0.4	-40	-20	0	0	1.24425	1.19481	-0.049436	0.571137	0.58827	2.99976	0.424358	6.08951	2.80143	2.88546	0.0299976	1.40071	1.44273	0.0299976	-0.0499907	0.570945	0.399731	[-0.16762803]
308	1.7095	0.4	-40	-19	0	0	1.24425	1.19187	-0.0523814	0.571137	0.58926	3.17315	0.425788	6.44699	2.80143	2.89032	0.0317315	1.40071	1.44516	0.0317315	-0.0529692	0.570934	0.399715	[-0.16988758]
309	1.7095	0.4	-40	-18	0	0	1.24425	1.18888	-0.0553659	0.571137	0.59026	3.34826	0.427235	6.80863	2.80143	2.89523	0.0334826	1.40071	1.44761	0.0334826	-0.0559871	0.570923	0.399699	[-0.17209538]
310	1.7095	0.4	-40	-17	0	0	1.24425	1.18586	-0.0583884	0.571137	0.59127	3.52502	0.428697	7.17429	2.80143	2.90018	0.0352502	1.40071	1.45009	0.0352502	-0.0590436	0.570911	0.399684	[-0.17425076]
311	1.7095	0.4	-40	-16	0	0	1.24425	1.1828	-0.0614481	0.571137	0.592288	3.70336	0.430175	7.54386	2.80143	2.90518	0.0370336	1.40071	1.45259	0.0370336	-0.0621376	0.5709	0.399668	[-0.17635306]
312	1.7095	0.4	-40	-15	0	0	1.24425	1.1797	-0.064544	0.571137	0.593316	3.88321	0.431669	7.9172	2.80143	2.91021	0.0388321	1.40071	1.45511	0.0388321	-0.0652682	0.570888	0.399651	[-0.17840164]
313	1.7095	0.4	-40	-14	0	0	1.24425	1.17657	-0.0676752	0.571137	0.594351	4.0645	0.433177	8.29419	2.80143	2.91529	0.040645	1.40071	1.45765	0.040645	-0.0684345	0.570877	0.399635	[-0.18039588]
314	1.7095	0.4	-40	-13	0	0	1.24425	1.17341	-0.0708407	0.571137	0.595394	4.24716	0.434699	8.6747	2.80143	2.92041	0.0424716	1.40071	1.4602	0.0424716	-0.0716356	0.570865	0.399619	[-0.18233517]
315	1.7095	0.4	-40	-12	0	0	1.24425	1.17021	-0.0740395	0.571137	0.596445	4.43112	0.436234	9.05859	2.80143	2.92556	0.0443112	1.40071	1.46278	0.0443112	-0.0748703	0.570853	0.399602	[-0.18421892]
316	1.7095	0.4	-40	-11	0	0	1.24425	1.16698	-0.0772708	0.571137	0.597503	4.61632	0.437783	9.44574	2.80143	2.93075	0.0461632	1.40071	1.46538	0.0461632	-0.0781378	0.570841	0.399586	[-0.18604655]
317	1.7095	0.4	-40	-10	0	0	1.24425	1.16371	-0.0805334	0.571137	0.598567	4.80268	0.439344	9.83602	2.80143	2.93597	0.0480268	1.40071	1.46799	0.0480268	-0.0814371	0.570829	0.399569	[-0.18781751]
318	1.7095	0.4	-40	-9	0	0	1.24425	1.16042	-0.0838265	0.571137	0.599638	4.99014	0.440917	10.2293	2.80143	2.94122	0.0499014	1.40071	1.47061	0.0499014	-0.0847671	0.570817	0.399552	[-0.18953126]
319	1.7095	0.4	-40	-8	0	0	1.24425	1.1571	-0.087149	0.571137	0.600714	5.17863	0.442502	10.6254	2.80143	2.9465	0.0517863	1.40071	1.47325	0.0517863	-0.0881269	0.570805	0.399535	[-0.19118728]
320	1.7095	0.4	-40	-7	0	0	1.24425	1.15375	-0.0904999	0.571137	0.601796	5.36808	0.444097	11.0243	2.80143	2.95181	0.0536808	1.40071	1.47591	0.0536808	-0.0915154	0.570793	0.399518	[-0.19278506]
321	1.7095	0.4	-40	-6	0	0	1.24425	1.15037	-0.0938781	0.571137	0.602883	5.55842	0.445703	11.4258	2.80143	2.95714	0.0555842	1.40071	1.47857	0.0555842	-0.0949315	0.570781	0.399501	[-0.19432411]
322	1.7095	0.4	-40	-5	0	0	1.24425	1.14697	-0.0972827	0.571137	0.603975	5.74959	0.447319	11.8298	2.80143	2.9625	0.0574959	1.40071	1.48125	0.0574959	-0.0983743	0.570769	0.399484	[-0.19580397]
323	1.7095	0.4	-40	-4	0	0	1.24425	1.14354	-0.100713	0.571137	0.605071	5.94152	0.448944	12.2361	2.80143	2.96788	0.0594152	1.40071	1.48394	0.0594152	-0.101843	0.570756	0.399467	[-0.19722419]
324	1.7095	0.4	-40	-3	0	0	1.24425	1.14008	-0.104167	0.571137	0.606172	6.13415	0.450578	12.6446	2.80143	2.97327	0.0613415	1.40071	1.48664	0.0613415	-0.105336	0.570744	0.39945	[-0.19858433]
325	1.7095	0.4	-40	-2	0	0	1.24425	1.1366	-0.107644	0.571137	0.607275	6.3274	0.452221	13.0552	2.80143	2.97869	0.063274	1.40071	1.48934	0.063274	-0.108852	0.570732	0.399432	[-0.19988398]
326	1.7095	0.4	-40	-1	0	0	1.24425	1.1331	-0.111144	0.571137	0.608382	6.52122	0.453871	13.4677	2.80143	2.98412	0.0652122	1.40071	1.49206	0.0652122	-0.112391	0.570719	0.399415	[-0.20112275]
327	1.7095	0.4	-40	0	0	0	1.24425	1.12958	-0.114664	0.571137	0.609492	6.71554	0.455528	13.8821	2.80143	2.98956	0.0671554	1.40071	1.49478	0.0671554	-0.115951	0.570707	0.399397	[-0.20230025]
328	1.984	0.1	-40	-40	0	0	1.44404	1.44404	0	0.285569	0.285569	0	0.1	-1.38778e-14	1.40071	1.40071	0	0.700357	0.700357	0	0	0.285569	0.1	[-0.13084002]
329	1.984	0.1	-40	-39	0	0	1.44404	1.44173	-0.00231536	0.285569	0.287212	0.575527	0.101154	1.15437	1.40071	1.40878	0.00575527	0.700357	0.704388	0.00575527	-0.00234134	0.28555	0.0999871	[-0.13447341]
330	1.984	0.1	-40	-38	0	0	1.44404	1.43935	-0.00469377	0.285569	0.288881	1.15999	0.102333	2.33343	1.40071	1.41696	0.0115999	0.700357	0.708481	0.0115999	-0.00474644	0.285531	0.099974	[-0.13806584]
331	1.984	0.1	-40	-37	0	0	1.44404	1.43691	-0.00713452	0.285569	0.290574	1.7529	0.103537	3.53653	1.40071	1.42527	0.017529	0.700357	0.712634	0.017529	-0.00721457	0.285512	0.0999607	[-0.14161621]
332	1.984	0.1	-40	-36	0	0	1.44404	1.4344	-0.00963686	0.285569	0.29229	2.35381	0.104763	4.76302	1.40071	1.43368	0.0235381	0.700357	0.716842	0.0235381	-0.00974499	0.285493	0.0999472	[-0.14512345]
333	1.984	0.1	-40	-35	0	0	1.44404	1.43184	-0.0122	0.285569	0.294028	2.96226	0.106012	6.01226	1.40071	1.44221	0.0296226	0.700357	0.721103	0.0296226	-0.0123369	0.285474	0.0999335	[-0.14858648]
334	1.984	0.1	-40	-34	0	0	1.44404	1.42922	-0.0148232	0.285569	0.295786	3.5778	0.107284	7.28361	1.40071	1.45083	0.035778	0.700357	0.725414	0.035778	-0.0149896	0.285454	0.0999197	[-0.15200425]
335	1.984	0.1	-40	-33	0	0	1.44404	1.42654	-0.0175057	0.285569	0.297563	4.20002	0.108576	8.57645	1.40071	1.45954	0.0420002	0.700357	0.729772	0.0420002	-0.0177021	0.285434	0.0999058	[-0.15537572]
336	1.984	0.1	-40	-32	0	0	1.44404	1.42379	-0.0202466	0.285569	0.299357	4.82851	0.10989	9.89016	1.40071	1.46835	0.0482851	0.700357	0.734174	0.0482851	-0.0204738	0.285414	0.0998917	[-0.15869985]
337	1.984	0.1	-40	-31	0	0	1.44404	1.421	-0.0230451	0.285569	0.301169	5.46285	0.111224	11.2241	1.40071	1.47723	0.0546285	0.700357	0.738616	0.0546285	-0.0233037	0.285394	0.0998774	[-0.16197565]
338	1.984	0.1	-40	-30	0	0	1.44404	1.41814	-0.0259003	0.285569	0.302996	6.10266	0.112578	12.5777	1.40071	1.48619	0.0610266	0.700357	0.743097	0.0610266	-0.026191	0.285373	0.0998631	[-0.16520211]
339	1.984	0.1	-40	-29	0	0	1.44404	1.41523	-0.0288114	0.285569	0.304838	6.74756	0.11395	13.9504	1.40071	1.49523	0.0674756	0.700357	0.747614	0.0674756	-0.0291347	0.285352	0.0998486	[-0.16837824]
340	1.984	0.1	-40	-28	0	0	1.44404	1.41226	-0.0317775	0.285569	0.306693	7.3972	0.115342	15.3416	1.40071	1.50433	0.073972	0.700357	0.752164	0.073972	-0.0321341	0.285332	0.0998341	[-0.17150309]
341	1.984	0.1	-40	-27	0	0	1.44404	1.40924	-0.0347977	0.285569	0.30856	8.05121	0.116751	16.7506	1.40071	1.51349	0.0805121	0.700357	0.756744	0.0805121	-0.0351882	0.285311	0.0998194	[-0.17457569]
342	1.984	0.1	-40	-26	0	0	1.44404	1.40617	-0.0378711	0.285569	0.31044	8.70926	0.118177	18.177	1.40071	1.52271	0.0870926	0.700357	0.761353	0.0870926	-0.038296	0.28529	0.0998046	[-0.17759512]
343	1.984	0.1	-40	-25	0	0	1.44404	1.40304	-0.0409966	0.285569	0.312329	9.371	0.11962	19.6202	1.40071	1.53198	0.09371	0.700357	0.765988	0.09371	-0.0414567	0.285268	0.0997898	[-0.18056045]
344	1.984	0.1	-40	-24	0	0	1.44404	1.39987	-0.0441735	0.285569	0.314229	10.0361	0.12108	21.0795	1.40071	1.54129	0.100361	0.700357	0.770646	0.100361	-0.0446692	0.285247	0.0997749	[-0.18347078]
345	1.984	0.1	-40	-23	0	0	1.44404	1.39664	-0.0474007	0.285569	0.316137	10.7043	0.122555	22.5545	1.40071	1.55065	0.107043	0.700357	0.775326	0.107043	-0.0479325	0.285226	0.0997599	[-0.18632522]
346	1.984	0.1	-40	-22	0	0	1.44404	1.39336	-0.0506771	0.285569	0.318053	11.3753	0.124045	24.0446	1.40071	1.56005	0.113753	0.700357	0.780025	0.113753	-0.0512458	0.285204	0.0997449	[-0.1891229]
347	1.984	0.1	-40	-21	0	0	1.44404	1.39004	-0.054002	0.285569	0.319976	12.0488	0.125549	25.5493	1.40071	1.56948	0.120488	0.700357	0.784741	0.120488	-0.0546079	0.285183	0.0997298	[-0.19186298]
348	1.984	0.1	-40	-20	0	0	1.44404	1.38667	-0.0573741	0.285569	0.321906	12.7244	0.127068	27.0679	1.40071	1.57895	0.127244	0.700357	0.789473	0.127244	-0.0580179	0.285161	0.0997146	[-0.19454461]
349	1.984	0.1	-40	-19	0	0	1.44404	1.38325	-0.0607925	0.285569	0.323841	13.402	0.1286	28.6001	1.40071	1.58844	0.13402	0.700357	0.794219	0.13402	-0.0614747	0.285139	0.0996995	[-0.19716699]
350	1.984	0.1	-40	-18	0	0	1.44404	1.37978	-0.0642562	0.285569	0.32578	14.0812	0.130145	30.1453	1.40071	1.59795	0.140812	0.700357	0.798976	0.140812	-0.0649772	0.285117	0.0996842	[-0.1997293]
351	1.984	0.1	-40	-17	0	0	1.44404	1.37628	-0.067764	0.285569	0.327724	14.7619	0.131703	31.7029	1.40071	1.60749	0.147619	0.700357	0.803743	0.147619	-0.0685244	0.285096	0.099669	[-0.20223078]
352	1.984	0.1	-40	-16	0	0	1.44404	1.37273	-0.071315	0.285569	0.329671	15.4437	0.133272	33.2724	1.40071	1.61704	0.154437	0.700357	0.808518	0.154437	-0.0721152	0.285074	0.0996537	[-0.20467065]
353	1.984	0.1	-40	-15	0	0	1.44404	1.36913	-0.074908	0.285569	0.331621	16.1264	0.134853	34.8534	1.40071	1.6266	0.161264	0.700357	0.813299	0.161264	-0.0757486	0.285052	0.0996384	[-0.20704818]
354	1.984	0.1	-40	-14	0	0	1.44404	1.3655	-0.078542	0.285569	0.333572	16.8098	0.136445	36.4453	1.40071	1.63617	0.168098	0.700357	0.818086	0.168098	-0.0794233	0.28503	0.0996231	[-0.20936264]
355	1.984	0.1	-40	-13	0	0	1.44404	1.36183	-0.0822158	0.285569	0.335525	17.4937	0.138048	38.0476	1.40071	1.64575	0.174937	0.700357	0.822875	0.174937	-0.0831383	0.285008	0.0996078	[-0.21161332]
356	1.984	0.1	-40	-12	0	0	1.44404	1.35811	-0.0859283	0.285569	0.337479	18.1778	0.13966	39.6598	1.40071	1.65533	0.181778	0.700357	0.827666	0.181778	-0.0868925	0.284986	0.0995925	[-0.21379955]
357	1.984	0.1	-40	-11	0	0	1.44404	1.35436	-0.0896784	0.285569	0.339432	18.8619	0.141281	41.2815	1.40071	1.66492	0.188619	0.700357	0.832458	0.188619	-0.0906847	0.284964	0.0995771	[-0.21592065]
358	1.984	0.1	-40	-10	0	0	1.44404	1.35058	-0.093465	0.285569	0.341385	19.5458	0.142912	42.9121	1.40071	1.6745	0.195458	0.700357	0.837248	0.195458	-0.0945137	0.284942	0.0995618	[-0.21797598]
359	1.984	0.1	-40	-9	0	0	1.44404	1.34675	-0.0972868	0.285569	0.343337	20.2294	0.144551	44.5511	1.40071	1.68407	0.202294	0.700357	0.842035	0.202294	-0.0983785	0.28492	0.0995465	[-0.21996491]
360	1.984	0.1	-40	-8	0	0	1.44404	1.3429	-0.101143	0.285569	0.345288	20.9124	0.146198	46.1981	1.40071	1.69364	0.209124	0.700357	0.846819	0.209124	-0.102278	0.284899	0.0995312	[-0.22188684]
361	1.984	0.1	-40	-7	0	0	1.44404	1.33901	-0.105032	0.285569	0.347236	21.5946	0.147853	47.8526	1.40071	1.70319	0.215946	0.700357	0.851597	0.215946	-0.10621	0.284877	0.099516	[-0.22374118]
362	1.984	0.1	-40	-6	0	0	1.44404	1.33509	-0.108952	0.285569	0.349182	22.2759	0.149514	49.514	1.40071	1.71274	0.222759	0.700357	0.856368	0.222759	-0.110175	0.284855	0.0995007	[-0.22552737]
363	1.984	0.1	-40	-5	0	0	1.44404	1.33114	-0.112904	0.285569	0.351124	22.9561	0.151182	51.182	1.40071	1.72226	0.229561	0.700357	0.861132	0.229561	-0.114171	0.284833	0.0994855	[-0.22724486]
364	1.984	0.1	-40	-4	0	0	1.44404	1.32716	-0.116884	0.285569	0.353063	23.635	0.152856	52.8561	1.40071	1.73177	0.23635	0.700357	0.865886	0.23635	-0.118196	0.284811	0.0994703	[-0.22889312]
365	1.984	0.1	-40	-3	0	0	1.44404	1.32315	-0.120893	0.285569	0.354997	24.3124	0.154536	54.5357	1.40071	1.74126	0.243124	0.700357	0.870631	0.243124	-0.12225	0.28479	0.0994551	[-0.23047167]
366	1.984	0.1	-40	-2	0	0	1.44404	1.31911	-0.124929	0.285569	0.356927	24.9882	0.15622	56.2204	1.40071	1.75073	0.249882	0.700357	0.875363	0.249882	-0.126331	0.284768	0.09944	[-0.23198001]
367	1.984	0.1	-40	-1	0	0	1.44404	1.31505	-0.12899	0.285569	0.358852	25.6621	0.15791	57.9098	1.40071	1.76017	0.256621	0.700357	0.880084	0.256621	-0.130438	0.284746	0.0994249	[-0.23341768]
368	1.984	0.1	-40	0	0	0	1.44404	1.31096	-0.133076	0.285569	0.360771	26.3342	0.159603	59.6033	1.40071	1.76958	0.263342	0.700357	0.88479	0.263342	-0.13457	0.284725	0.0994099	[-0.23478426]
369	1.984	0.2	-40	-40	0	0	1.44404	1.44404	0	0.403855	0.403855	0	0.2	0	1.98091	1.98091	0	0.990454	0.990454	0	0	0.403855	0.2	[-0.13084002]
370	1.984	0.2	-40	-39	0	0	1.44404	1.44173	-0.00231536	0.403855	0.40502	0.288587	0.201156	0.578006	1.98091	1.98663	0.00288587	0.990454	0.993313	0.00288587	-0.00234134	0.403842	0.199987	[-0.13447341]
371	1.984	0.2	-40	-38	0	0	1.44404	1.43935	-0.00469377	0.403855	0.406211	0.583319	0.20234	1.17004	1.98091	1.99246	0.00583319	0.990454	0.996232	0.00583319	-0.00474644	0.403829	0.199974	[-0.13806584]
372	1.984	0.2	-40	-37	0	0	1.44404	1.43691	-0.00713452	0.403855	0.407425	0.884	0.203552	1.77581	1.98091	1.99842	0.00884	0.990454	0.99921	0.00884	-0.00721457	0.403815	0.19996	[-0.14161621]
373	1.984	0.2	-40	-36	0	0	1.44404	1.4344	-0.00963686	0.403855	0.408663	1.19044	0.20479	2.39504	1.98091	2.00449	0.0119044	0.990454	1.00225	0.0119044	-0.00974499	0.403801	0.199947	[-0.14512345]
374	1.984	0.2	-40	-35	0	0	1.44404	1.43184	-0.0122	0.403855	0.409923	1.50243	0.206055	3.02743	1.98091	2.01067	0.0150243	0.990454	1.00534	0.0150243	-0.0123369	0.403787	0.199933	[-0.14858648]
375	1.984	0.2	-40	-34	0	0	1.44404	1.42922	-0.0148232	0.403855	0.411204	1.81979	0.207345	3.67269	1.98091	2.01696	0.0181979	0.990454	1.00848	0.0181979	-0.0149896	0.403773	0.199918	[-0.15200425]
376	1.984	0.2	-40	-33	0	0	1.44404	1.42654	-0.0175057	0.403855	0.412507	2.14232	0.208661	4.33053	1.98091	2.02335	0.0214232	0.990454	1.01167	0.0214232	-0.0177021	0.403758	0.199904	[-0.15537572]
377	1.984	0.2	-40	-32	0	0	1.44404	1.42379	-0.0202466	0.403855	0.41383	2.46982	0.210001	5.00065	1.98091	2.02983	0.0246982	0.990454	1.01492	0.0246982	-0.0204738	0.403743	0.199889	[-0.15869985]
378	1.984	0.2	-40	-31	0	0	1.44404	1.421	-0.0230451	0.403855	0.415172	2.80212	0.211366	5.68275	1.98091	2.03642	0.0280212	0.990454	1.01821	0.0280212	-0.0233037	0.403728	0.199874	[-0.16197565]
379	1.984	0.2	-40	-30	0	0	1.44404	1.41814	-0.0259003	0.403855	0.416532	3.13901	0.212753	6.37655	1.98091	2.04309	0.0313901	0.990454	1.02154	0.0313901	-0.026191	0.403713	0.199859	[-0.16520211]
380	1.984	0.2	-40	-29	0	0	1.44404	1.41523	-0.0288114	0.403855	0.41791	3.4803	0.214163	7.08174	1.98091	2.04985	0.034803	0.990454	1.02493	0.034803	-0.0291347	0.403697	0.199844	[-0.16837824]
381	1.984	0.2	-40	-28	0	0	1.44404	1.41226	-0.0317775	0.403855	0.419306	3.82582	0.215596	7.79802	1.98091	2.05669	0.0382582	0.990454	1.02835	0.0382582	-0.0321341	0.403682	0.199828	[-0.17150309]
382	1.984	0.2	-40	-27	0	0	1.44404	1.40924	-0.0347977	0.403855	0.420717	4.17538	0.21705	8.52509	1.98091	2.06362	0.0417538	0.990454	1.03181	0.0417538	-0.0351882	0.403666	0.199813	[-0.17457569]
383	1.984	0.2	-40	-26	0	0	1.44404	1.40617	-0.0378711	0.403855	0.422145	4.52879	0.218525	9.26267	1.98091	2.07062	0.0452879	0.990454	1.03531	0.0452879	-0.038296	0.40365	0.199797	[-0.17759512]
384	1.984	0.2	-40	-25	0	0	1.44404	1.40304	-0.0409966	0.403855	0.423587	4.88586	0.220021	10.0104	1.98091	2.07769	0.0488586	0.990454	1.03885	0.0488586	-0.0414567	0.403634	0.199781	[-0.18056045]
385	1.984	0.2	-40	-24	0	0	1.44404	1.39987	-0.0441735	0.403855	0.425043	5.24644	0.221536	10.7681	1.98091	2.08484	0.0524644	0.990454	1.04242	0.0524644	-0.0446692	0.403617	0.199765	[-0.18347078]
386	1.984	0.2	-40	-23	0	0	1.44404	1.39664	-0.0474007	0.403855	0.426513	5.61033	0.223071	11.5354	1.98091	2.09204	0.0561033	0.990454	1.04602	0.0561033	-0.0479325	0.403601	0.199748	[-0.18632522]
387	1.984	0.2	-40	-22	0	0	1.44404	1.39336	-0.0506771	0.403855	0.427995	5.97736	0.224624	12.312	1.98091	2.09931	0.0597736	0.990454	1.04966	0.0597736	-0.0512458	0.403584	0.199732	[-0.1891229]
388	1.984	0.2	-40	-21	0	0	1.44404	1.39004	-0.054002	0.403855	0.429489	6.34736	0.226195	13.0976	1.98091	2.10664	0.0634736	0.990454	1.05332	0.0634736	-0.0546079	0.403567	0.199715	[-0.19186298]
389	1.984	0.2	-40	-20	0	0	1.44404	1.38667	-0.0573741	0.403855	0.430995	6.72016	0.227784	13.8919	1.98091	2.11403	0.0672016	0.990454	1.05701	0.0672016	-0.0580179	0.40355	0.199698	[-0.19454461]
390	1.984	0.2	-40	-19	0	0	1.44404	1.38325	-0.0607925	0.403855	0.432511	7.09559	0.229389	14.6947	1.98091	2.12147	0.0709559	0.990454	1.06073	0.0709559	-0.0614747	0.403533	0.199682	[-0.19716699]
391	1.984	0.2	-40	-18	0	0	1.44404	1.37978	-0.0642562	0.403855	0.434037	7.47349	0.231011	15.5055	1.98091	2.12895	0.0747349	0.990454	1.06448	0.0747349	-0.0649772	0.403516	0.199665	[-0.1997293]
392	1.984	0.2	-40	-17	0	0	1.44404	1.37628	-0.067764	0.403855	0.435573	7.8537	0.232648	16.3242	1.98091	2.13648	0.078537	0.990454	1.06824	0.078537	-0.0685244	0.403499	0.199648	[-0.20223078]
393	1.984	0.2	-40	-16	0	0	1.44404	1.37273	-0.071315	0.403855	0.437117	8.23605	0.234301	17.1504	1.98091	2.14406	0.0823605	0.990454	1.07203	0.0823605	-0.0721152	0.403482	0.199631	[-0.20467065]
394	1.984	0.2	-40	-15	0	0	1.44404	1.36913	-0.074908	0.403855	0.438669	8.62039	0.235968	17.9839	1.98091	2.15167	0.0862039	0.990454	1.07584	0.0862039	-0.0757486	0.403464	0.199613	[-0.20704818]
395	1.984	0.2	-40	-14	0	0	1.44404	1.3655	-0.078542	0.403855	0.440228	9.00656	0.237649	18.8243	1.98091	2.15932	0.0900656	0.990454	1.07966	0.0900656	-0.0794233	0.403447	0.199596	[-0.20936264]
396	1.984	0.2	-40	-13	0	0	1.44404	1.36183	-0.0822158	0.403855	0.441795	9.39442	0.239343	19.6714	1.98091	2.167	0.0939442	0.990454	1.0835	0.0939442	-0.0831383	0.403429	0.199579	[-0.21161332]
397	1.984	0.2	-40	-12	0	0	1.44404	1.35811	-0.0859283	0.403855	0.443367	9.78381	0.24105	20.5248	1.98091	2.17472	0.0978381	0.990454	1.08736	0.0978381	-0.0868925	0.403412	0.199561	[-0.21379955]
398	1.984	0.2	-40	-11	0	0	1.44404	1.35436	-0.0896784	0.403855	0.444946	10.1746	0.242769	21.3844	1.98091	2.18246	0.101746	0.990454	1.09123	0.101746	-0.0906847	0.403394	0.199544	[-0.21592065]
399	1.984	0.2	-40	-10	0	0	1.44404	1.35058	-0.093465	0.403855	0.446529	10.5666	0.244499	22.2497	1.98091	2.19022	0.105666	0.990454	1.09511	0.105666	-0.0945137	0.403376	0.199526	[-0.21797598]
400	1.984	0.2	-40	-9	0	0	1.44404	1.34675	-0.0972868	0.403855	0.448116	10.9597	0.246241	23.1206	1.98091	2.19801	0.109597	0.990454	1.09901	0.109597	-0.0983785	0.403358	0.199508	[-0.21996491]
401	1.984	0.2	-40	-8	0	0	1.44404	1.3429	-0.101143	0.403855	0.449708	11.3538	0.247993	23.9966	1.98091	2.20582	0.113538	0.990454	1.10291	0.113538	-0.102278	0.403341	0.199491	[-0.22188684]
402	1.984	0.2	-40	-7	0	0	1.44404	1.33901	-0.105032	0.403855	0.451303	11.7487	0.249755	24.8776	1.98091	2.21364	0.117487	0.990454	1.10682	0.117487	-0.10621	0.403323	0.199473	[-0.22374118]
403	1.984	0.2	-40	-6	0	0	1.44404	1.33509	-0.108952	0.403855	0.4529	12.1442	0.251527	25.7633	1.98091	2.22148	0.121442	0.990454	1.11074	0.121442	-0.110175	0.403305	0.199455	[-0.22552737]
404	1.984	0.2	-40	-5	0	0	1.44404	1.33114	-0.112904	0.403855	0.4545	12.5404	0.253307	26.6533	1.98091	2.22932	0.125404	0.990454	1.11466	0.125404	-0.114171	0.403287	0.199438	[-0.22724486]
405	1.984	0.2	-40	-4	0	0	1.44404	1.32716	-0.116884	0.403855	0.456101	12.9369	0.255095	27.5475	1.98091	2.23718	0.129369	0.990454	1.11859	0.129369	-0.118196	0.403269	0.19942	[-0.22889312]
406	1.984	0.2	-40	-3	0	0	1.44404	1.32315	-0.120893	0.403855	0.457704	13.3338	0.256891	28.4454	1.98091	2.24504	0.133338	0.990454	1.12252	0.133338	-0.12225	0.403251	0.199402	[-0.23047167]
407	1.984	0.2	-40	-2	0	0	1.44404	1.31911	-0.124929	0.403855	0.459307	13.7308	0.258694	29.3469	1.98091	2.2529	0.137308	0.990454	1.12645	0.137308	-0.126331	0.403233	0.199384	[-0.23198001]
408	1.984	0.2	-40	-1	0	0	1.44404	1.31505	-0.12899	0.403855	0.460911	14.1278	0.260503	30.2516	1.98091	2.26077	0.141278	0.990454	1.13038	0.141278	-0.130438	0.403215	0.199366	[-0.23341768]
409	1.984	0.2	-40	0	0	0	1.44404	1.31096	-0.133076	0.403855	0.462514	14.5248	0.262319	31.1594	1.98091	2.26863	0.145248	0.990454	1.13432	0.145248	-0.13457	0.403197	0.199349	[-0.23478426]
410	1.984	0.3	-40	-40	0	0	1.44404	1.44404	0	0.494619	0.494619	1.1223e-14	0.3	1.85037e-14	2.42611	2.42611	0	1.21305	1.21305	0	0	0.494619	0.3	[-0.13084002]
411	1.984	0.3	-40	-39	0	0	1.44404	1.44173	-0.00231536	0.494619	0.495572	0.192575	0.301157	0.385522	2.42611	2.43078	0.00192575	1.21305	1.21539	0.00192575	-0.00234134	0.494609	0.299987	[-0.13447341]
412	1.984	0.3	-40	-38	0	0	1.44404	1.43935	-0.00469377	0.494619	0.496547	0.389629	0.302342	0.780777	2.42611	2.43556	0.00389629	1.21305	1.21778	0.00389629	-0.00474644	0.494598	0.299974	[-0.13806584]
413	1.984	0.3	-40	-37	0	0	1.44404	1.43691	-0.00713452	0.494619	0.497543	0.59105	0.303557	1.18559	2.42611	2.44045	0.0059105	1.21305	1.22022	0.0059105	-0.00721457	0.494587	0.29996	[-0.14161621]
414	1.984	0.3	-40	-36	0	0	1.44404	1.4344	-0.00963686	0.494619	0.49856	0.796724	0.304799	1.5998	2.42611	2.44544	0.00796724	1.21305	1.22272	0.00796724	-0.00974499	0.494575	0.299946	[-0.14512345]
415	1.984	0.3	-40	-35	0	0	1.44404	1.43184	-0.0122	0.494619	0.499598	1.00654	0.30607	2.02321	2.42611	2.45053	0.0100654	1.21305	1.22526	0.0100654	-0.0123369	0.494564	0.299932	[-0.14858648]
416	1.984	0.3	-40	-34	0	0	1.44404	1.42922	-0.0148232	0.494619	0.500656	1.22038	0.307367	2.45565	2.42611	2.45572	0.0122038	1.21305	1.22786	0.0122038	-0.0149896	0.494552	0.299918	[-0.15200425]
417	1.984	0.3	-40	-33	0	0	1.44404	1.42654	-0.0175057	0.494619	0.501733	1.43813	0.308691	2.89694	2.42611	2.461	0.0143813	1.21305	1.2305	0.0143813	-0.0177021	0.49454	0.299903	[-0.15537572]
418	1.984	0.3	-40	-32	0	0	1.44404	1.42379	-0.0202466	0.494619	0.502828	1.65967	0.310041	3.34689	2.42611	2.46637	0.0165967	1.21305	1.23319	0.0165967	-0.0204738	0.494527	0.299888	[-0.15869985]
419	1.984	0.3	-40	-31	0	0	1.44404	1.421	-0.0230451	0.494619	0.503942	1.8849	0.311416	3.80532	2.42611	2.47184	0.018849	1.21305	1.23592	0.018849	-0.0233037	0.494515	0.299873	[-0.16197565]
420	1.984	0.3	-40	-30	0	0	1.44404	1.41814	-0.0259003	0.494619	0.505074	2.11368	0.312816	4.27205	2.42611	2.47739	0.0211368	1.21305	1.23869	0.0211368	-0.026191	0.494502	0.299858	[-0.16520211]
421	1.984	0.3	-40	-29	0	0	1.44404	1.41523	-0.0288114	0.494619	0.506223	2.34592	0.314241	4.74687	2.42611	2.48302	0.0234592	1.21305	1.24151	0.0234592	-0.0291347	0.494489	0.299842	[-0.16837824]
422	1.984	0.3	-40	-28	0	0	1.44404	1.41226	-0.0317775	0.494619	0.507388	2.58149	0.315689	5.22962	2.42611	2.48874	0.0258149	1.21305	1.24437	0.0258149	-0.0321341	0.494476	0.299826	[-0.17150309]
423	1.984	0.3	-40	-27	0	0	1.44404	1.40924	-0.0347977	0.494619	0.508569	2.82027	0.31716	5.72008	2.42611	2.49453	0.0282027	1.21305	1.24727	0.0282027	-0.0351882	0.494463	0.29981	[-0.17457569]
424	1.984	0.3	-40	-26	0	0	1.44404	1.40617	-0.0378711	0.494619	0.509765	3.06215	0.318654	6.21808	2.42611	2.5004	0.0306215	1.21305	1.2502	0.0306215	-0.038296	0.494449	0.299794	[-0.17759512]
425	1.984	0.3	-40	-25	0	0	1.44404	1.40304	-0.0409966	0.494619	0.510977	3.30702	0.32017	6.72341	2.42611	2.50634	0.0330702	1.21305	1.25317	0.0330702	-0.0414567	0.494436	0.299777	[-0.18056045]
426	1.984	0.3	-40	-24	0	0	1.44404	1.39987	-0.0441735	0.494619	0.512202	3.55476	0.321708	7.23589	2.42611	2.51235	0.0355476	1.21305	1.25618	0.0355476	-0.0446692	0.494422	0.299761	[-0.18347078]
427	1.984	0.3	-40	-23	0	0	1.44404	1.39664	-0.0474007	0.494619	0.513441	3.80526	0.323266	7.75531	2.42611	2.51843	0.0380526	1.21305	1.25921	0.0380526	-0.0479325	0.494408	0.299744	[-0.18632522]
428	1.984	0.3	-40	-22	0	0	1.44404	1.39336	-0.0506771	0.494619	0.514693	4.05839	0.324844	8.28149	2.42611	2.52457	0.0405839	1.21305	1.26228	0.0405839	-0.0512458	0.494394	0.299727	[-0.1891229]
429	1.984	0.3	-40	-21	0	0	1.44404	1.39004	-0.054002	0.494619	0.515958	4.31405	0.326443	8.81422	2.42611	2.53077	0.0431405	1.21305	1.26539	0.0431405	-0.0546079	0.49438	0.29971	[-0.19186298]
430	1.984	0.3	-40	-20	0	0	1.44404	1.38667	-0.0573741	0.494619	0.517234	4.57213	0.32806	9.3533	2.42611	2.53703	0.0457213	1.21305	1.26852	0.0457213	-0.0580179	0.494366	0.299692	[-0.19454461]
431	1.984	0.3	-40	-19	0	0	1.44404	1.38325	-0.0607925	0.494619	0.518522	4.83251	0.329696	9.89855	2.42611	2.54335	0.0483251	1.21305	1.27167	0.0483251	-0.0614747	0.494351	0.299675	[-0.19716699]
432	1.984	0.3	-40	-18	0	0	1.44404	1.37978	-0.0642562	0.494619	0.519821	5.09508	0.331349	10.4498	2.42611	2.54972	0.0509508	1.21305	1.27486	0.0509508	-0.0649772	0.494337	0.299657	[-0.1997293]
433	1.984	0.3	-40	-17	0	0	1.44404	1.37628	-0.067764	0.494619	0.52113	5.35973	0.33302	11.0067	2.42611	2.55614	0.0535973	1.21305	1.27807	0.0535973	-0.0685244	0.494322	0.299639	[-0.20223078]
434	1.984	0.3	-40	-16	0	0	1.44404	1.37273	-0.071315	0.494619	0.522448	5.62636	0.334708	11.5693	2.42611	2.56261	0.0562636	1.21305	1.2813	0.0562636	-0.0721152	0.494307	0.299621	[-0.20467065]
435	1.984	0.3	-40	-15	0	0	1.44404	1.36913	-0.074908	0.494619	0.523776	5.89484	0.336412	12.1372	2.42611	2.56912	0.0589484	1.21305	1.28456	0.0589484	-0.0757486	0.494292	0.299603	[-0.20704818]
436	1.984	0.3	-40	-14	0	0	1.44404	1.3655	-0.078542	0.494619	0.525113	6.16508	0.338131	12.7102	2.42611	2.57568	0.0616508	1.21305	1.28784	0.0616508	-0.0794233	0.494277	0.299585	[-0.20936264]
437	1.984	0.3	-40	-13	0	0	1.44404	1.36183	-0.0822158	0.494619	0.526458	6.43697	0.339865	13.2883	2.42611	2.58228	0.0643697	1.21305	1.29114	0.0643697	-0.0831383	0.494262	0.299567	[-0.21161332]
438	1.984	0.3	-40	-12	0	0	1.44404	1.35811	-0.0859283	0.494619	0.52781	6.7104	0.341613	13.8711	2.42611	2.58891	0.067104	1.21305	1.29445	0.067104	-0.0868925	0.494247	0.299548	[-0.21379955]
439	1.984	0.3	-40	-11	0	0	1.44404	1.35436	-0.0896784	0.494619	0.52917	6.98526	0.343375	14.4585	2.42611	2.59558	0.0698526	1.21305	1.29779	0.0698526	-0.0906847	0.494232	0.29953	[-0.21592065]
440	1.984	0.3	-40	-10	0	0	1.44404	1.35058	-0.093465	0.494619	0.530536	7.26146	0.345151	15.0502	2.42611	2.60228	0.0726146	1.21305	1.30114	0.0726146	-0.0945137	0.494216	0.299511	[-0.21797598]
441	1.984	0.3	-40	-9	0	0	1.44404	1.34675	-0.0972868	0.494619	0.531908	7.53889	0.346938	15.6461	2.42611	2.60901	0.0753889	1.21305	1.3045	0.0753889	-0.0983785	0.494201	0.299493	[-0.21996491]
442	1.984	0.3	-40	-8	0	0	1.44404	1.3429	-0.101143	0.494619	0.533286	7.81744	0.348738	16.246	2.42611	2.61577	0.0781744	1.21305	1.30788	0.0781744	-0.102278	0.494185	0.299474	[-0.22188684]
443	1.984	0.3	-40	-7	0	0	1.44404	1.33901	-0.105032	0.494619	0.534669	8.09703	0.350549	16.8497	2.42611	2.62255	0.0809703	1.21305	1.31128	0.0809703	-0.10621	0.49417	0.299455	[-0.22374118]
444	1.984	0.3	-40	-6	0	0	1.44404	1.33509	-0.108952	0.494619	0.536056	8.37754	0.352371	17.4569	2.42611	2.62936	0.0837754	1.21305	1.31468	0.0837754	-0.110175	0.494154	0.299436	[-0.22552737]
445	1.984	0.3	-40	-5	0	0	1.44404	1.33114	-0.112904	0.494619	0.537448	8.65888	0.354203	18.0675	2.42611	2.63618	0.0865888	1.21305	1.31809	0.0865888	-0.114171	0.494139	0.299417	[-0.22724486]
446	1.984	0.3	-40	-4	0	0	1.44404	1.32716	-0.116884	0.494619	0.538843	8.94096	0.356044	18.6813	2.42611	2.64303	0.0894096	1.21305	1.32151	0.0894096	-0.118196	0.494123	0.299398	[-0.22889312]
447	1.984	0.3	-40	-3	0	0	1.44404	1.32315	-0.120893	0.494619	0.540241	9.22367	0.357894	19.2981	2.42611	2.64988	0.0922367	1.21305	1.32494	0.0922367	-0.12225	0.494107	0.299379	[-0.23047167]
448	1.984	0.3	-40	-2	0	0	1.44404	1.31911	-0.124929	0.494619	0.541642	9.50693	0.359753	19.9177	2.42611	2.65676	0.0950693	1.21305	1.32838	0.0950693	-0.126331	0.494092	0.29936	[-0.23198001]
449	1.984	0.3	-40	-1	0	0	1.44404	1.31505	-0.12899	0.494619	0.543046	9.79064	0.36162	20.5398	2.42611	2.66364	0.0979064	1.21305	1.33182	0.0979064	-0.130438	0.494076	0.299341	[-0.23341768]
450	1.984	0.3	-40	0	0	0	1.44404	1.31096	-0.133076	0.494619	0.544451	10.0747	0.363493	21.1644	2.42611	2.67053	0.100747	1.21305	1.33527	0.100747	-0.13457	0.49406	0.299322	[-0.23478426]
451	1.984	0.4	-40	-40	0	0	1.44404	1.44404	0	0.571137	0.571137	0	0.4	-1.38778e-14	2.80143	2.80143	0	1.40071	1.40071	0	0	0.571137	0.4	[-0.13084002]
452	1.984	0.4	-40	-39	0	0	1.44404	1.44173	-0.00231536	0.571137	0.571963	0.144501	0.401157	0.289211	2.80143	2.80548	0.00144501	1.40071	1.40274	0.00144501	-0.00234134	0.571128	0.399987	[-0.13447341]
453	1.984	0.4	-40	-38	0	0	1.44404	1.43935	-0.00469377	0.571137	0.572808	0.292505	0.402343	0.585866	2.80143	2.80962	0.00292505	1.40071	1.40481	0.00292505	-0.00474644	0.571119	0.399974	[-0.13806584]
454	1.984	0.4	-40	-37	0	0	1.44404	1.43691	-0.00713452	0.571137	0.573673	0.443937	0.403559	0.889844	2.80143	2.81386	0.00443937	1.40071	1.40693	0.00443937	-0.00721457	0.571109	0.39996	[-0.14161621]
455	1.984	0.4	-40	-36	0	0	1.44404	1.4344	-0.00963686	0.571137	0.574557	0.598719	0.404804	1.20102	2.80143	2.8182	0.00598719	1.40071	1.4091	0.00598719	-0.00974499	0.571099	0.399946	[-0.14512345]
456	1.984	0.4	-40	-35	0	0	1.44404	1.43184	-0.0122	0.571137	0.575459	0.756774	0.406077	1.51928	2.80143	2.82263	0.00756774	1.40071	1.41131	0.00756774	-0.0123369	0.571089	0.399932	[-0.14858648]
457	1.984	0.4	-40	-34	0	0	1.44404	1.42922	-0.0148232	0.571137	0.57638	0.918025	0.407378	1.84448	2.80143	2.82715	0.00918025	1.40071	1.41357	0.00918025	-0.0149896	0.571078	0.399918	[-0.15200425]
458	1.984	0.4	-40	-33	0	0	1.44404	1.42654	-0.0175057	0.571137	0.577319	1.08239	0.408706	2.1765	2.80143	2.83175	0.0108239	1.40071	1.41588	0.0108239	-0.0177021	0.571068	0.399903	[-0.15537572]
459	1.984	0.4	-40	-32	0	0	1.44404	1.42379	-0.0202466	0.571137	0.578275	1.24979	0.410061	2.51521	2.80143	2.83644	0.0124979	1.40071	1.41822	0.0124979	-0.0204738	0.571057	0.399888	[-0.15869985]
460	1.984	0.4	-40	-31	0	0	1.44404	1.421	-0.0230451	0.571137	0.579248	1.42015	0.411442	2.86047	2.80143	2.84121	0.0142015	1.40071	1.42061	0.0142015	-0.0233037	0.571046	0.399873	[-0.16197565]
461	1.984	0.4	-40	-30	0	0	1.44404	1.41814	-0.0259003	0.571137	0.580238	1.59338	0.412849	3.21215	2.80143	2.84607	0.0159338	1.40071	1.42303	0.0159338	-0.026191	0.571035	0.399857	[-0.16520211]
462	1.984	0.4	-40	-29	0	0	1.44404	1.41523	-0.0288114	0.571137	0.581243	1.76941	0.41428	3.57012	2.80143	2.851	0.0176941	1.40071	1.4255	0.0176941	-0.0291347	0.571024	0.399841	[-0.16837824]
463	1.984	0.4	-40	-28	0	0	1.44404	1.41226	-0.0317775	0.571137	0.582264	1.94814	0.415737	3.93424	2.80143	2.856	0.0194814	1.40071	1.428	0.0194814	-0.0321341	0.571012	0.399825	[-0.17150309]
464	1.984	0.4	-40	-27	0	0	1.44404	1.40924	-0.0347977	0.571137	0.5833	2.12951	0.417217	4.30437	2.80143	2.86108	0.0212951	1.40071	1.43054	0.0212951	-0.0351882	0.571001	0.399809	[-0.17457569]
465	1.984	0.4	-40	-26	0	0	1.44404	1.40617	-0.0378711	0.571137	0.58435	2.31342	0.418721	4.68036	2.80143	2.86624	0.0231342	1.40071	1.43312	0.0231342	-0.038296	0.570989	0.399792	[-0.17759512]
466	1.984	0.4	-40	-25	0	0	1.44404	1.40304	-0.0409966	0.571137	0.585415	2.4998	0.420248	5.06209	2.80143	2.87146	0.024998	1.40071	1.43573	0.024998	-0.0414567	0.570977	0.399776	[-0.18056045]
467	1.984	0.4	-40	-24	0	0	1.44404	1.39987	-0.0441735	0.571137	0.586493	2.68856	0.421798	5.4494	2.80143	2.87675	0.0268856	1.40071	1.43837	0.0268856	-0.0446692	0.570965	0.399759	[-0.18347078]
468	1.984	0.4	-40	-23	0	0	1.44404	1.39664	-0.0474007	0.571137	0.587584	2.87962	0.423369	5.84216	2.80143	2.8821	0.0287962	1.40071	1.44105	0.0287962	-0.0479325	0.570953	0.399742	[-0.18632522]
469	1.984	0.4	-40	-22	0	0	1.44404	1.39336	-0.0506771	0.571137	0.588688	3.07289	0.424961	6.24022	2.80143	2.88751	0.0307289	1.40071	1.44376	0.0307289	-0.0512458	0.57094	0.399724	[-0.1891229]
470	1.984	0.4	-40	-21	0	0	1.44404	1.39004	-0.054002	0.571137	0.589804	3.2683	0.426574	6.64343	2.80143	2.89299	0.032683	1.40071	1.44649	0.032683	-0.0546079	0.570928	0.399707	[-0.19186298]
471	1.984	0.4	-40	-20	0	0	1.44404	1.38667	-0.0573741	0.571137	0.590932	3.46577	0.428207	7.05165	2.80143	2.89852	0.0346577	1.40071	1.44926	0.0346577	-0.0580179	0.570915	0.399689	[-0.19454461]
472	1.984	0.4	-40	-19	0	0	1.44404	1.38325	-0.0607925	0.571137	0.592071	3.6652	0.429859	7.46473	2.80143	2.90411	0.036652	1.40071	1.45205	0.036652	-0.0614747	0.570902	0.399671	[-0.19716699]
473	1.984	0.4	-40	-18	0	0	1.44404	1.37978	-0.0642562	0.571137	0.59322	3.86651	0.43153	7.88252	2.80143	2.90975	0.0386651	1.40071	1.45487	0.0386651	-0.0649772	0.570889	0.399653	[-0.1997293]
474	1.984	0.4	-40	-17	0	0	1.44404	1.37628	-0.067764	0.571137	0.59438	4.06963	0.43322	8.30488	2.80143	2.91544	0.0406963	1.40071	1.45772	0.0406963	-0.0685244	0.570876	0.399635	[-0.20223078]
475	1.984	0.4	-40	-16	0	0	1.44404	1.37273	-0.071315	0.571137	0.59555	4.27448	0.434927	8.73166	2.80143	2.92117	0.0427448	1.40071	1.46059	0.0427448	-0.0721152	0.570863	0.399616	[-0.20467065]
476	1.984	0.4	-40	-15	0	0	1.44404	1.36913	-0.074908	0.571137	0.59673	4.48096	0.436651	9.16271	2.80143	2.92696	0.0448096	1.40071	1.46348	0.0448096	-0.0757486	0.57085	0.399598	[-0.20704818]
477	1.984	0.4	-40	-14	0	0	1.44404	1.3655	-0.078542	0.571137	0.597918	4.68901	0.438392	9.59788	2.80143	2.93279	0.0468901	1.40071	1.46639	0.0468901	-0.0794233	0.570837	0.399579	[-0.20936264]
478	1.984	0.4	-40	-13	0	0	1.44404	1.36183	-0.0822158	0.571137	0.599115	4.89853	0.440148	10.037	2.80143	2.93866	0.0489853	1.40071	1.46933	0.0489853	-0.0831383	0.570823	0.39956	[-0.21161332]
479	1.984	0.4	-40	-12	0	0	1.44404	1.35811	-0.0859283	0.571137	0.600319	5.10945	0.44192	10.48	2.80143	2.94457	0.0510945	1.40071	1.47228	0.0510945	-0.0868925	0.57081	0.399541	[-0.21379955]
480	1.984	0.4	-40	-11	0	0	1.44404	1.35436	-0.0896784	0.571137	0.601531	5.3217	0.443706	10.9266	2.80143	2.95051	0.053217	1.40071	1.47526	0.053217	-0.0906847	0.570796	0.399522	[-0.21592065]
481	1.984	0.4	-40	-10	0	0	1.44404	1.35058	-0.093465	0.571137	0.602751	5.53518	0.445507	11.3767	2.80143	2.95649	0.0553518	1.40071	1.47825	0.0553518	-0.0945137	0.570783	0.399503	[-0.21797598]
482	1.984	0.4	-40	-9	0	0	1.44404	1.34675	-0.0972868	0.571137	0.603977	5.74982	0.447321	11.8302	2.80143	2.96251	0.0574982	1.40071	1.48125	0.0574982	-0.0983785	0.570769	0.399484	[-0.21996491]
483	1.984	0.4	-40	-8	0	0	1.44404	1.3429	-0.101143	0.571137	0.605209	5.96555	0.449148	12.287	2.80143	2.96855	0.0596555	1.40071	1.48427	0.0596555	-0.102278	0.570755	0.399465	[-0.22188684]
484	1.984	0.4	-40	-7	0	0	1.44404	1.33901	-0.105032	0.571137	0.606447	6.18228	0.450987	12.7468	2.80143	2.97462	0.0618228	1.40071	1.48731	0.0618228	-0.10621	0.570741	0.399445	[-0.22374118]
485	1.984	0.4	-40	-6	0	0	1.44404	1.33509	-0.108952	0.571137	0.60769	6.39994	0.452838	13.2095	2.80143	2.98072	0.0639994	1.40071	1.49036	0.0639994	-0.110175	0.570727	0.399426	[-0.22552737]
486	1.984	0.4	-40	-5	0	0	1.44404	1.33114	-0.112904	0.571137	0.608938	6.61844	0.4547	13.6749	2.80143	2.98684	0.0661844	1.40071	1.49342	0.0661844	-0.114171	0.570713	0.399406	[-0.22724486]
487	1.984	0.4	-40	-4	0	0	1.44404	1.32716	-0.116884	0.571137	0.61019	6.83773	0.456572	14.143	2.80143	2.99298	0.0683773	1.40071	1.49649	0.0683773	-0.118196	0.570699	0.399386	[-0.22889312]
488	1.984	0.4	-40	-3	0	0	1.44404	1.32315	-0.120893	0.571137	0.611446	7.05771	0.458454	14.6135	2.80143	2.99914	0.0705771	1.40071	1.49957	0.0705771	-0.12225	0.570685	0.399367	[-0.23047167]
489	1.984	0.4	-40	-2	0	0	1.44404	1.31911	-0.124929	0.571137	0.612706	7.27832	0.460346	15.0864	2.80143	3.00533	0.0727832	1.40071	1.50266	0.0727832	-0.126331	0.570671	0.399347	[-0.23198001]
490	1.984	0.4	-40	-1	0	0	1.44404	1.31505	-0.12899	0.571137	0.61397	7.49948	0.462246	15.5614	2.80143	3.01152	0.0749948	1.40071	1.50576	0.0749948	-0.130438	0.570657	0.399327	[-0.23341768]
491	1.984	0.4	-40	0	0	0	1.44404	1.31096	-0.133076	0.571137	0.615235	7.72112	0.464154	16.0384	2.80143	3.01773	0.0772112	1.40071	1.50886	0.0772112	-0.13457	0.570642	0.399307	[-0.23478426]
492	1.435	0.1	-30	-30	0	0	1.02572	1.02572	0	0.285569	0.285569	0	0.1	-1.38778e-14	1.40071	1.40071	0	0.700357	0.700357	0	0	0.285569	0.1	[-0.11948842]
493	1.435	0.1	-30	-29	0	0	1.02572	1.02362	-0.00210557	0.285569	0.287064	0.52365	0.10105	1.05004	1.40071	1.40805	0.0052365	0.700357	0.704024	0.0052365	-0.00212919	0.285552	0.0999882	[-0.12178568]
494	1.435	0.1	-30	-28	0	0	1.02572	1.02147	-0.00425091	0.285569	0.288572	1.05167	0.102114	2.11439	1.40071	1.41544	0.0105167	0.700357	0.707722	0.0105167	-0.00429861	0.285535	0.0999764	[-0.12404583]
495	1.435	0.1	-30	-27	0	0	1.02572	1.01929	-0.00643536	0.285569	0.290091	1.58376	0.103193	3.1926	1.40071	1.4229	0.0158376	0.700357	0.711449	0.0158376	-0.00650757	0.285518	0.0999645	[-0.12626821]
496	1.435	0.1	-30	-26	0	0	1.02572	1.01706	-0.00865827	0.285569	0.291622	2.11964	0.104284	4.28421	1.40071	1.4304	0.0211964	0.700357	0.715202	0.0211964	-0.00875543	0.285501	0.0999524	[-0.12845212]
497	1.435	0.1	-30	-25	0	0	1.02572	1.0148	-0.010919	0.285569	0.293162	2.65904	0.105389	5.38878	1.40071	1.43796	0.0265904	0.700357	0.71898	0.0265904	-0.0110415	0.285483	0.0999403	[-0.1305969]
498	1.435	0.1	-30	-24	0	0	1.02572	1.0125	-0.0132167	0.285569	0.294712	3.20168	0.106506	6.50586	1.40071	1.44556	0.0320168	0.700357	0.72278	0.0320168	-0.013365	0.285466	0.0999282	[-0.1327019]
499	1.435	0.1	-30	-23	0	0	1.02572	1.01017	-0.0155509	0.285569	0.29627	3.7473	0.107635	7.63503	1.40071	1.4532	0.037473	0.700357	0.726602	0.037473	-0.0157254	0.285449	0.0999159	[-0.13476648]
500	1.435	0.1	-30	-22	0	0	1.02572	1.0078	-0.0179207	0.285569	0.297836	4.29566	0.108776	8.77584	1.40071	1.46088	0.0429566	0.700357	0.730442	0.0429566	-0.0181218	0.285431	0.0999036	[-0.13679]
501	1.435	0.1	-30	-21	0	0	1.02572	1.0054	-0.0203255	0.285569	0.299409	4.8465	0.109928	9.92788	1.40071	1.4686	0.048465	0.700357	0.7343	0.048465	-0.0205536	0.285413	0.0998913	[-0.13877186]
502	1.435	0.1	-30	-20	0	0	1.02572	1.00296	-0.0227645	0.285569	0.300988	5.39958	0.111091	11.0907	1.40071	1.47635	0.0539958	0.700357	0.738173	0.0539958	-0.02302	0.285396	0.0998789	[-0.14071145]
503	1.435	0.1	-30	-19	0	0	1.02572	1.00048	-0.025237	0.285569	0.302573	5.95468	0.112264	12.2639	1.40071	1.48412	0.0595468	0.700357	0.742061	0.0595468	-0.0255202	0.285378	0.0998664	[-0.14260818]
504	1.435	0.1	-30	-18	0	0	1.02572	0.997979	-0.0277423	0.285569	0.304164	6.51156	0.113447	13.4471	1.40071	1.49192	0.0651156	0.700357	0.745961	0.0651156	-0.0280535	0.28536	0.0998539	[-0.14446147]
505	1.435	0.1	-30	-17	0	0	1.02572	0.995442	-0.0302794	0.285569	0.305758	7.07001	0.11464	14.6399	1.40071	1.49974	0.0707001	0.700357	0.749872	0.0707001	-0.0306192	0.285342	0.0998414	[-0.14627075]
506	1.435	0.1	-30	-16	0	0	1.02572	0.992874	-0.0328478	0.285569	0.307357	7.62981	0.115842	15.8418	1.40071	1.50759	0.0762981	0.700357	0.753793	0.0762981	-0.0332164	0.285324	0.0998288	[-0.14803548]
507	1.435	0.1	-30	-15	0	0	1.02572	0.990275	-0.0354466	0.285569	0.308959	8.19076	0.117052	17.0524	1.40071	1.51544	0.0819076	0.700357	0.757722	0.0819076	-0.0358443	0.285306	0.0998163	[-0.14975511]
508	1.435	0.1	-30	-14	0	0	1.02572	0.987647	-0.038075	0.285569	0.310563	8.75265	0.118271	18.2714	1.40071	1.52331	0.0875265	0.700357	0.761657	0.0875265	-0.0385022	0.285288	0.0998037	[-0.15142913]
509	1.435	0.1	-30	-13	0	0	1.02572	0.98499	-0.0407322	0.285569	0.31217	9.3153	0.119498	19.4983	1.40071	1.53119	0.093153	0.700357	0.765597	0.093153	-0.0411892	0.28527	0.0997911	[-0.15305702]
510	1.435	0.1	-30	-12	0	0	1.02572	0.982304	-0.0434174	0.285569	0.313779	9.8785	0.120733	20.7329	1.40071	1.53908	0.098785	0.700357	0.769542	0.098785	-0.0439046	0.285252	0.0997784	[-0.15463828]
511	1.435	0.1	-30	-11	0	0	1.02572	0.979592	-0.0461298	0.285569	0.315388	10.4421	0.121975	21.9745	1.40071	1.54698	0.104421	0.700357	0.773489	0.104421	-0.0466474	0.285234	0.0997658	[-0.15617245]
512	1.435	0.1	-30	-10	0	0	1.02572	0.976853	-0.0488686	0.285569	0.316998	11.0059	0.123223	23.223	1.40071	1.55487	0.110059	0.700357	0.777437	0.110059	-0.0494169	0.285216	0.0997532	[-0.15765904]
513	1.435	0.1	-30	-9	0	0	1.02572	0.974089	-0.0516329	0.285569	0.318608	11.5696	0.124478	24.4779	1.40071	1.56277	0.115696	0.700357	0.781386	0.115696	-0.0522122	0.285198	0.0997405	[-0.15909761]
514	1.435	0.1	-30	-8	0	0	1.02572	0.9713	-0.0544218	0.285569	0.320218	12.1333	0.125739	25.7388	1.40071	1.57067	0.121333	0.700357	0.785333	0.121333	-0.0550325	0.28518	0.0997279	[-0.16048771]
515	1.435	0.1	-30	-7	0	0	1.02572	0.968487	-0.0572347	0.285569	0.321826	12.6966	0.127005	27.0053	1.40071	1.57856	0.126966	0.700357	0.789279	0.126966	-0.0578769	0.285162	0.0997153	[-0.16182893]
516	1.435	0.1	-30	-6	0	0	1.02572	0.965651	-0.0600705	0.285569	0.323434	13.2595	0.128277	28.2771	1.40071	1.58644	0.132595	0.700357	0.793221	0.132595	-0.0607445	0.285144	0.0997027	[-0.16312085]
517	1.435	0.1	-30	-5	0	0	1.02572	0.962793	-0.0629284	0.285569	0.325039	13.8217	0.129554	29.5538	1.40071	1.59432	0.138217	0.700357	0.797158	0.138217	-0.0636345	0.285126	0.0996901	[-0.16436309]
518	1.435	0.1	-30	-4	0	0	1.02572	0.959914	-0.0658075	0.285569	0.326642	14.3831	0.130835	30.835	1.40071	1.60218	0.143831	0.700357	0.80109	0.143831	-0.0665459	0.285108	0.0996775	[-0.16555526]
519	1.435	0.1	-30	-3	0	0	1.02572	0.957015	-0.068707	0.285569	0.328243	14.9436	0.13212	32.1204	1.40071	1.61003	0.149436	0.700357	0.805016	0.149436	-0.069478	0.28509	0.0996649	[-0.166697]
520	1.435	0.1	-30	-2	0	0	1.02572	0.954096	-0.071626	0.285569	0.329841	15.5031	0.13341	33.4096	1.40071	1.61787	0.155031	0.700357	0.808934	0.155031	-0.0724298	0.285072	0.0996524	[-0.16778796]
521	1.435	0.1	-30	-1	0	0	1.02572	0.951158	-0.0745636	0.285569	0.331435	16.0613	0.134702	34.7022	1.40071	1.62569	0.160613	0.700357	0.812843	0.160613	-0.0754003	0.285054	0.0996399	[-0.16882781]
522	1.435	0.1	-30	0	0	0	1.02572	0.948203	-0.0775189	0.285569	0.333025	16.6181	0.135998	35.9979	1.40071	1.63349	0.166181	0.700357	0.816743	0.166181	-0.0783888	0.285036	0.0996274	[-0.16981624]
523	1.435	0.2	-30	-30	0	0	1.02572	1.02572	0	0.403855	0.403855	0	0.2	0	1.98091	1.98091	0	0.990454	0.990454	0	0	0.403855	0.2	[-0.11948842]
524	1.435	0.2	-30	-29	0	0	1.02572	1.02362	-0.00210557	0.403855	0.404915	0.262507	0.201051	0.525703	1.98091	1.98611	0.00262507	0.990454	0.993054	0.00262507	-0.00212919	0.403843	0.199988	[-0.12178568]
525	1.435	0.2	-30	-28	0	0	1.02572	1.02147	-0.00425091	0.403855	0.40599	0.528569	0.20212	1.05993	1.98091	1.99138	0.00528569	0.990454	0.99569	0.00528569	-0.00429861	0.403831	0.199976	[-0.12404583]
526	1.435	0.2	-30	-27	0	0	1.02572	1.01929	-0.00643536	0.403855	0.407078	0.798052	0.203205	1.60247	1.98091	1.99672	0.00798052	0.990454	0.998359	0.00798052	-0.00650757	0.403819	0.199964	[-0.12626821]
527	1.435	0.2	-30	-26	0	0	1.02572	1.01706	-0.00865827	0.403855	0.40818	1.07082	0.204306	2.1531	1.98091	2.00212	0.0107082	0.990454	1.00106	0.0107082	-0.00875543	0.403806	0.199952	[-0.12845212]
528	1.435	0.2	-30	-25	0	0	1.02572	1.0148	-0.010919	0.403855	0.409294	1.34673	0.205423	2.7116	1.98091	2.00759	0.0134673	0.990454	1.00379	0.0134673	-0.0110415	0.403794	0.19994	[-0.1305969]
529	1.435	0.2	-30	-24	0	0	1.02572	1.0125	-0.0132167	0.403855	0.41042	1.62566	0.206556	3.27776	1.98091	2.01311	0.0162566	0.990454	1.00656	0.0162566	-0.013365	0.403781	0.199927	[-0.1327019]
530	1.435	0.2	-30	-23	0	0	1.02572	1.01017	-0.0155509	0.403855	0.411558	1.90748	0.207703	3.85134	1.98091	2.01869	0.0190748	0.990454	1.00935	0.0190748	-0.0157254	0.403769	0.199914	[-0.13476648]
531	1.435	0.2	-30	-22	0	0	1.02572	1.0078	-0.0179207	0.403855	0.412708	2.19204	0.208864	4.43213	1.98091	2.02433	0.0219204	0.990454	1.01217	0.0219204	-0.0181218	0.403756	0.199902	[-0.13679]
532	1.435	0.2	-30	-21	0	0	1.02572	1.0054	-0.0203255	0.403855	0.413867	2.47923	0.21004	5.01992	1.98091	2.03002	0.0247923	0.990454	1.01501	0.0247923	-0.0205536	0.403743	0.199889	[-0.13877186]
533	1.435	0.2	-30	-20	0	0	1.02572	1.00296	-0.0227645	0.403855	0.415037	2.7689	0.211229	5.61447	1.98091	2.03576	0.027689	0.990454	1.01788	0.027689	-0.02302	0.40373	0.199876	[-0.14071145]
534	1.435	0.2	-30	-19	0	0	1.02572	1.00048	-0.025237	0.403855	0.416217	3.06094	0.212431	6.21556	1.98091	2.04154	0.0306094	0.990454	1.02077	0.0306094	-0.0255202	0.403716	0.199863	[-0.14260818]
535	1.435	0.2	-30	-18	0	0	1.02572	0.997979	-0.0277423	0.403855	0.417405	3.35521	0.213646	6.82299	1.98091	2.04737	0.0335521	0.990454	1.02369	0.0335521	-0.0280535	0.403703	0.199849	[-0.14446147]
536	1.435	0.2	-30	-17	0	0	1.02572	0.995442	-0.0302794	0.403855	0.418602	3.65159	0.214873	7.43652	1.98091	2.05324	0.0365159	0.990454	1.02662	0.0365159	-0.0306192	0.40369	0.199836	[-0.14627075]
537	1.435	0.2	-30	-16	0	0	1.02572	0.992874	-0.0328478	0.403855	0.419807	3.94995	0.216112	8.05593	1.98091	2.05915	0.0394995	0.990454	1.02958	0.0394995	-0.0332164	0.403676	0.199823	[-0.14803548]
538	1.435	0.2	-30	-15	0	0	1.02572	0.990275	-0.0354466	0.403855	0.42102	4.25018	0.217362	8.68101	1.98091	2.0651	0.0425018	0.990454	1.03255	0.0425018	-0.0358443	0.403662	0.199809	[-0.14975511]
539	1.435	0.2	-30	-14	0	0	1.02572	0.987647	-0.038075	0.403855	0.422239	4.55215	0.218623	9.31152	1.98091	2.07108	0.0455215	0.990454	1.03554	0.0455215	-0.0385022	0.403649	0.199796	[-0.15142913]
540	1.435	0.2	-30	-13	0	0	1.02572	0.98499	-0.0407322	0.403855	0.423465	4.85574	0.219895	9.94726	1.98091	2.0771	0.0485574	0.990454	1.03855	0.0485574	-0.0411892	0.403635	0.199782	[-0.15305702]
541	1.435	0.2	-30	-12	0	0	1.02572	0.982304	-0.0434174	0.403855	0.424697	5.16083	0.221176	10.588	1.98091	2.08314	0.0516083	0.990454	1.04157	0.0516083	-0.0439046	0.403621	0.199768	[-0.15463828]
542	1.435	0.2	-30	-11	0	0	1.02572	0.979592	-0.0461298	0.403855	0.425935	5.46731	0.222467	11.2335	1.98091	2.08921	0.0546731	0.990454	1.04461	0.0546731	-0.0466474	0.403607	0.199755	[-0.15617245]
543	1.435	0.2	-30	-10	0	0	1.02572	0.976853	-0.0488686	0.403855	0.427178	5.77506	0.223767	11.8836	1.98091	2.09531	0.0577506	0.990454	1.04765	0.0577506	-0.0494169	0.403593	0.199741	[-0.15765904]
544	1.435	0.2	-30	-9	0	0	1.02572	0.974089	-0.0516329	0.403855	0.428425	6.08396	0.225076	12.5381	1.98091	2.10143	0.0608396	0.990454	1.05071	0.0608396	-0.0522122	0.403579	0.199727	[-0.15909761]
545	1.435	0.2	-30	-8	0	0	1.02572	0.9713	-0.0544218	0.403855	0.429677	6.39391	0.226393	13.1966	1.98091	2.10757	0.0639391	0.990454	1.05378	0.0639391	-0.0550325	0.403565	0.199713	[-0.16048771]
546	1.435	0.2	-30	-7	0	0	1.02572	0.968487	-0.0572347	0.403855	0.430933	6.70479	0.227718	13.8591	1.98091	2.11372	0.0670479	0.990454	1.05686	0.0670479	-0.0578769	0.403551	0.199699	[-0.16182893]
547	1.435	0.2	-30	-6	0	0	1.02572	0.965651	-0.0600705	0.403855	0.432191	7.01649	0.229051	14.5253	1.98091	2.1199	0.0701649	0.990454	1.05995	0.0701649	-0.0607445	0.403537	0.199685	[-0.16312085]
548	1.435	0.2	-30	-5	0	0	1.02572	0.962793	-0.0629284	0.403855	0.433453	7.32892	0.23039	15.195	1.98091	2.12609	0.0732892	0.990454	1.06304	0.0732892	-0.0636345	0.403523	0.199671	[-0.16436309]
549	1.435	0.2	-30	-4	0	0	1.02572	0.959914	-0.0658075	0.403855	0.434717	7.64195	0.231736	15.8679	1.98091	2.13229	0.0764195	0.990454	1.06614	0.0764195	-0.0665459	0.403509	0.199657	[-0.16555526]
550	1.435	0.2	-30	-3	0	0	1.02572	0.957015	-0.068707	0.403855	0.435984	7.95548	0.233088	16.5439	1.98091	2.1385	0.0795548	0.990454	1.06925	0.0795548	-0.069478	0.403495	0.199643	[-0.166697]
551	1.435	0.2	-30	-2	0	0	1.02572	0.954096	-0.071626	0.403855	0.437251	8.26942	0.234445	17.2227	1.98091	2.14472	0.0826942	0.990454	1.07236	0.0826942	-0.0724298	0.40348	0.199629	[-0.16778796]
552	1.435	0.2	-30	-1	0	0	1.02572	0.951158	-0.0745636	0.403855	0.438521	8.58366	0.235808	17.9041	1.98091	2.15094	0.0858366	0.990454	1.07547	0.0858366	-0.0754003	0.403466	0.199615	[-0.16882781]
553	1.435	0.2	-30	0	0	0	1.02572	0.948203	-0.0775189	0.403855	0.43979	8.89811	0.237176	18.588	1.98091	2.15717	0.0889811	0.990454	1.07859	0.0889811	-0.0783888	0.403452	0.199601	[-0.16981624]
554	1.435	0.3	-30	-30	0	0	1.02572	1.02572	0	0.494619	0.494619	1.1223e-14	0.3	1.85037e-14	2.42611	2.42611	0	1.21305	1.21305	0	0	0.494619	0.3	[-0.11948842]
555	1.435	0.3	-30	-29	0	0	1.02572	1.02362	-0.00210557	0.494619	0.495486	0.175157	0.301052	0.350621	2.42611	2.43036	0.00175157	1.21305	1.21518	0.00175157	-0.00212919	0.49461	0.299988	[-0.12178568]
556	1.435	0.3	-30	-28	0	0	1.02572	1.02147	-0.00425091	0.494619	0.496365	0.352996	0.302122	0.707238	2.42611	2.43467	0.00352996	1.21305	1.21734	0.00352996	-0.00429861	0.4946	0.299976	[-0.12404583]
557	1.435	0.3	-30	-27	0	0	1.02572	1.01929	-0.00643536	0.494619	0.497258	0.533435	0.303209	1.06972	2.42611	2.43905	0.00533435	1.21305	1.21952	0.00533435	-0.00650757	0.49459	0.299964	[-0.12626821]
558	1.435	0.3	-30	-26	0	0	1.02572	1.01706	-0.00865827	0.494619	0.498163	0.716391	0.304314	1.43791	2.42611	2.44349	0.00716391	1.21305	1.22174	0.00716391	-0.00875543	0.49458	0.299952	[-0.12845212]
559	1.435	0.3	-30	-25	0	0	1.02572	1.0148	-0.010919	0.494619	0.49908	0.901781	0.305435	1.81169	2.42611	2.44799	0.00901781	1.21305	1.22399	0.00901781	-0.0110415	0.494569	0.299939	[-0.1305969]
560	1.435	0.3	-30	-24	0	0	1.02572	1.0125	-0.0132167	0.494619	0.500008	1.08952	0.306573	2.19092	2.42611	2.45254	0.0108952	1.21305	1.22627	0.0108952	-0.013365	0.494559	0.299927	[-0.1327019]
561	1.435	0.3	-30	-23	0	0	1.02572	1.01017	-0.0155509	0.494619	0.500948	1.27954	0.307726	2.57544	2.42611	2.45715	0.0127954	1.21305	1.22858	0.0127954	-0.0157254	0.494548	0.299914	[-0.13476648]
562	1.435	0.3	-30	-22	0	0	1.02572	1.0078	-0.0179207	0.494619	0.501899	1.47173	0.308895	2.96513	2.42611	2.46181	0.0147173	1.21305	1.23091	0.0147173	-0.0181218	0.494538	0.299901	[-0.13679]
563	1.435	0.3	-30	-21	0	0	1.02572	1.0054	-0.0203255	0.494619	0.50286	1.66604	0.310079	3.35983	2.42611	2.46653	0.0166604	1.21305	1.23326	0.0166604	-0.0205536	0.494527	0.299888	[-0.13877186]
564	1.435	0.3	-30	-20	0	0	1.02572	1.00296	-0.0227645	0.494619	0.503831	1.86236	0.311278	3.75941	2.42611	2.47129	0.0186236	1.21305	1.23565	0.0186236	-0.02302	0.494516	0.299875	[-0.14071145]
565	1.435	0.3	-30	-19	0	0	1.02572	1.00048	-0.025237	0.494619	0.504812	2.06062	0.312491	4.16371	2.42611	2.4761	0.0206062	1.21305	1.23805	0.0206062	-0.0255202	0.494505	0.299861	[-0.14260818]
566	1.435	0.3	-30	-18	0	0	1.02572	0.997979	-0.0277423	0.494619	0.505801	2.26074	0.313718	4.5726	2.42611	2.48096	0.0226074	1.21305	1.24048	0.0226074	-0.0280535	0.494494	0.299848	[-0.14446147]
567	1.435	0.3	-30	-17	0	0	1.02572	0.995442	-0.0302794	0.494619	0.5068	2.46264	0.314958	4.98593	2.42611	2.48585	0.0246264	1.21305	1.24293	0.0246264	-0.0306192	0.494483	0.299834	[-0.14627075]
568	1.435	0.3	-30	-16	0	0	1.02572	0.992874	-0.0328478	0.494619	0.507807	2.66623	0.316211	5.40355	2.42611	2.49079	0.0266623	1.21305	1.2454	0.0266623	-0.0332164	0.494471	0.299821	[-0.14803548]
569	1.435	0.3	-30	-15	0	0	1.02572	0.990275	-0.0354466	0.494619	0.508822	2.87143	0.317476	5.82531	2.42611	2.49577	0.0287143	1.21305	1.24789	0.0287143	-0.0358443	0.49446	0.299807	[-0.14975511]
570	1.435	0.3	-30	-14	0	0	1.02572	0.987647	-0.038075	0.494619	0.509845	3.07816	0.318753	6.25108	2.42611	2.50079	0.0307816	1.21305	1.25039	0.0307816	-0.0385022	0.494449	0.299793	[-0.15142913]
571	1.435	0.3	-30	-13	0	0	1.02572	0.98499	-0.0407322	0.494619	0.510874	3.28635	0.320042	6.6807	2.42611	2.50584	0.0328635	1.21305	1.25292	0.0328635	-0.0411892	0.494437	0.299779	[-0.15305702]
572	1.435	0.3	-30	-12	0	0	1.02572	0.982304	-0.0434174	0.494619	0.511911	3.4959	0.321342	7.11402	2.42611	2.51092	0.034959	1.21305	1.25546	0.034959	-0.0439046	0.494425	0.299765	[-0.15463828]
573	1.435	0.3	-30	-11	0	0	1.02572	0.979592	-0.0461298	0.494619	0.512954	3.70675	0.322653	7.5509	2.42611	2.51604	0.0370675	1.21305	1.25802	0.0370675	-0.0466474	0.494414	0.29975	[-0.15617245]
574	1.435	0.3	-30	-10	0	0	1.02572	0.976853	-0.0488686	0.494619	0.514003	3.91881	0.323974	7.99119	2.42611	2.52118	0.0391881	1.21305	1.26059	0.0391881	-0.0494169	0.494402	0.299736	[-0.15765904]
575	1.435	0.3	-30	-9	0	0	1.02572	0.974089	-0.0516329	0.494619	0.515057	4.132	0.325304	8.43474	2.42611	2.52635	0.04132	1.21305	1.26318	0.04132	-0.0522122	0.49439	0.299722	[-0.15909761]
576	1.435	0.3	-30	-8	0	0	1.02572	0.9713	-0.0544218	0.494619	0.516117	4.34625	0.326644	8.88141	2.42611	2.53155	0.0434625	1.21305	1.26578	0.0434625	-0.0550325	0.494378	0.299707	[-0.16048771]
577	1.435	0.3	-30	-7	0	0	1.02572	0.968487	-0.0572347	0.494619	0.517181	4.56148	0.327993	9.33104	2.42611	2.53677	0.0456148	1.21305	1.26839	0.0456148	-0.0578769	0.494366	0.299693	[-0.16182893]
578	1.435	0.3	-30	-6	0	0	1.02572	0.965651	-0.0600705	0.494619	0.51825	4.77762	0.32935	9.78349	2.42611	2.54202	0.0477762	1.21305	1.27101	0.0477762	-0.0607445	0.494354	0.299678	[-0.16312085]
579	1.435	0.3	-30	-5	0	0	1.02572	0.962793	-0.0629284	0.494619	0.519323	4.99457	0.330716	10.2386	2.42611	2.54728	0.0499457	1.21305	1.27364	0.0499457	-0.0636345	0.494342	0.299664	[-0.16436309]
580	1.435	0.3	-30	-4	0	0	1.02572	0.959914	-0.0658075	0.494619	0.5204	5.21228	0.332089	10.6962	2.42611	2.55256	0.0521228	1.21305	1.27628	0.0521228	-0.0665459	0.49433	0.299649	[-0.16555526]
581	1.435	0.3	-30	-3	0	0	1.02572	0.957015	-0.068707	0.494619	0.52148	5.43067	0.333469	11.1563	2.42611	2.55786	0.0543067	1.21305	1.27893	0.0543067	-0.069478	0.494318	0.299634	[-0.166697]
582	1.435	0.3	-30	-2	0	0	1.02572	0.954096	-0.071626	0.494619	0.522564	5.64965	0.334855	11.6185	2.42611	2.56317	0.0564965	1.21305	1.28159	0.0564965	-0.0724298	0.494306	0.29962	[-0.16778796]
583	1.435	0.3	-30	-1	0	0	1.02572	0.951158	-0.0745636	0.494619	0.523649	5.86917	0.336248	12.0828	2.42611	2.5685	0.0586917	1.21305	1.28425	0.0586917	-0.0754003	0.494294	0.299605	[-0.16882781]
584	1.435	0.3	-30	0	0	0	1.02572	0.948203	-0.0775189	0.494619	0.524737	6.08914	0.337647	12.549	2.42611	2.57384	0.0608914	1.21305	1.28692	0.0608914	-0.0783888	0.494281	0.29959	[-0.16981624]
585	1.435	0.4	-30	-30	0	0	1.02572	1.02572	0	0.571137	0.571137	0	0.4	-1.38778e-14	2.80143	2.80143	0	1.40071	1.40071	0	0	0.571137	0.4	[-0.11948842]
586	1.435	0.4	-30	-29	0	0	1.02572	1.02362	-0.00210557	0.571137	0.571888	0.131425	0.401052	0.263023	2.80143	2.80511	0.00131425	1.40071	1.40255	0.00131425	-0.00212919	0.571129	0.399988	[-0.12178568]
587	1.435	0.4	-30	-28	0	0	1.02572	1.02147	-0.00425091	0.571137	0.572651	0.264979	0.402123	0.530661	2.80143	2.80885	0.00264979	1.40071	1.40443	0.00264979	-0.00429861	0.57112	0.399976	[-0.12404583]
588	1.435	0.4	-30	-27	0	0	1.02572	1.01929	-0.00643536	0.571137	0.573425	0.400605	0.403211	0.802816	2.80143	2.81265	0.00400605	1.40071	1.40633	0.00400605	-0.00650757	0.571112	0.399964	[-0.12626821]
589	1.435	0.4	-30	-26	0	0	1.02572	1.01706	-0.00865827	0.571137	0.574211	0.538245	0.404318	1.07939	2.80143	2.81651	0.00538245	1.40071	1.40825	0.00538245	-0.00875543	0.571103	0.399952	[-0.12845212]
590	1.435	0.4	-30	-25	0	0	1.02572	1.0148	-0.010919	0.571137	0.575009	0.67784	0.405441	1.36028	2.80143	2.82042	0.0067784	1.40071	1.41021	0.0067784	-0.0110415	0.571094	0.399939	[-0.1305969]
591	1.435	0.4	-30	-24	0	0	1.02572	1.0125	-0.0132167	0.571137	0.575817	0.819333	0.406582	1.64538	2.80143	2.82438	0.00819333	1.40071	1.41219	0.00819333	-0.013365	0.571085	0.399926	[-0.1327019]
592	1.435	0.4	-30	-23	0	0	1.02572	1.01017	-0.0155509	0.571137	0.576635	0.962664	0.407738	1.93459	2.80143	2.8284	0.00962664	1.40071	1.4142	0.00962664	-0.0157254	0.571076	0.399914	[-0.13476648]
593	1.435	0.4	-30	-22	0	0	1.02572	1.0078	-0.0179207	0.571137	0.577464	1.10777	0.408911	2.22782	2.80143	2.83246	0.0110777	1.40071	1.41623	0.0110777	-0.0181218	0.571066	0.399901	[-0.13679]
594	1.435	0.4	-30	-21	0	0	1.02572	1.0054	-0.0203255	0.571137	0.578303	1.2546	0.4101	2.52495	2.80143	2.83658	0.012546	1.40071	1.41829	0.012546	-0.0205536	0.571057	0.399887	[-0.13877186]
595	1.435	0.4	-30	-20	0	0	1.02572	1.00296	-0.0227645	0.571137	0.579151	1.4031	0.411304	2.82588	2.80143	2.84073	0.014031	1.40071	1.42037	0.014031	-0.02302	0.571047	0.399874	[-0.14071145]
596	1.435	0.4	-30	-19	0	0	1.02572	1.00048	-0.025237	0.571137	0.580008	1.55319	0.412522	3.13051	2.80143	2.84494	0.0155319	1.40071	1.42247	0.0155319	-0.0255202	0.571038	0.399861	[-0.14260818]
597	1.435	0.4	-30	-18	0	0	1.02572	0.997979	-0.0277423	0.571137	0.580874	1.70483	0.413755	3.43872	2.80143	2.84919	0.0170483	1.40071	1.42459	0.0170483	-0.0280535	0.571028	0.399847	[-0.14446147]
598	1.435	0.4	-30	-17	0	0	1.02572	0.995442	-0.0302794	0.571137	0.581749	1.85794	0.415002	3.75041	2.80143	2.85348	0.0185794	1.40071	1.42674	0.0185794	-0.0306192	0.571018	0.399833	[-0.14627075]
599	1.435	0.4	-30	-16	0	0	1.02572	0.992874	-0.0328478	0.571137	0.582631	2.01249	0.416262	4.06547	2.80143	2.85781	0.0201249	1.40071	1.4289	0.0201249	-0.0332164	0.571008	0.399819	[-0.14803548]
600	1.435	0.4	-30	-15	0	0	1.02572	0.990275	-0.0354466	0.571137	0.583522	2.16839	0.417535	4.3838	2.80143	2.86217	0.0216839	1.40071	1.43109	0.0216839	-0.0358443	0.570998	0.399805	[-0.14975511]
601	1.435	0.4	-30	-14	0	0	1.02572	0.987647	-0.038075	0.571137	0.58442	2.3256	0.418821	4.70529	2.80143	2.86658	0.023256	1.40071	1.43329	0.023256	-0.0385022	0.570988	0.399791	[-0.15142913]
602	1.435	0.4	-30	-13	0	0	1.02572	0.98499	-0.0407322	0.571137	0.585325	2.48406	0.420119	5.02982	2.80143	2.87102	0.0248406	1.40071	1.43551	0.0248406	-0.0411892	0.570978	0.399777	[-0.15305702]
603	1.435	0.4	-30	-12	0	0	1.02572	0.982304	-0.0434174	0.571137	0.586236	2.6437	0.421429	5.35728	2.80143	2.87549	0.026437	1.40071	1.43774	0.026437	-0.0439046	0.570968	0.399763	[-0.15463828]
604	1.435	0.4	-30	-11	0	0	1.02572	0.979592	-0.0461298	0.571137	0.587155	2.80446	0.42275	5.68758	2.80143	2.87999	0.0280446	1.40071	1.44	0.0280446	-0.0466474	0.570958	0.399748	[-0.15617245]
605	1.435	0.4	-30	-10	0	0	1.02572	0.976853	-0.0488686	0.571137	0.588079	2.9663	0.424082	6.02058	2.80143	2.88453	0.029663	1.40071	1.44226	0.029663	-0.0494169	0.570947	0.399734	[-0.15765904]
606	1.435	0.4	-30	-9	0	0	1.02572	0.974089	-0.0516329	0.571137	0.589009	3.12914	0.425425	6.35619	2.80143	2.88909	0.0312914	1.40071	1.44454	0.0312914	-0.0522122	0.570937	0.399719	[-0.15909761]
607	1.435	0.4	-30	-8	0	0	1.02572	0.9713	-0.0544218	0.571137	0.589944	3.29293	0.426777	6.6943	2.80143	2.89368	0.0329293	1.40071	1.44684	0.0329293	-0.0550325	0.570926	0.399704	[-0.16048771]
608	1.435	0.4	-30	-7	0	0	1.02572	0.968487	-0.0572347	0.571137	0.590885	3.45762	0.428139	7.03478	2.80143	2.89829	0.0345762	1.40071	1.44915	0.0345762	-0.0578769	0.570916	0.39969	[-0.16182893]
609	1.435	0.4	-30	-6	0	0	1.02572	0.965651	-0.0600705	0.571137	0.59183	3.62313	0.42951	7.37754	2.80143	2.90293	0.0362313	1.40071	1.45146	0.0362313	-0.0607445	0.570905	0.399675	[-0.16312085]
610	1.435	0.4	-30	-5	0	0	1.02572	0.962793	-0.0629284	0.571137	0.59278	3.78943	0.43089	7.72245	2.80143	2.90759	0.0378943	1.40071	1.45379	0.0378943	-0.0636345	0.570894	0.39966	[-0.16436309]
611	1.435	0.4	-30	-4	0	0	1.02572	0.959914	-0.0658075	0.571137	0.593734	3.95644	0.432278	8.06941	2.80143	2.91226	0.0395644	1.40071	1.45613	0.0395644	-0.0665459	0.570884	0.399645	[-0.16555526]
612	1.435	0.4	-30	-3	0	0	1.02572	0.957015	-0.068707	0.571137	0.594692	4.12411	0.433673	8.4183	2.80143	2.91696	0.0412411	1.40071	1.45848	0.0412411	-0.069478	0.570873	0.39963	[-0.166697]
613	1.435	0.4	-30	-2	0	0	1.02572	0.954096	-0.071626	0.571137	0.595653	4.29238	0.435076	8.76901	2.80143	2.92168	0.0429238	1.40071	1.46084	0.0429238	-0.0724298	0.570862	0.399615	[-0.16778796]
614	1.435	0.4	-30	-1	0	0	1.02572	0.951158	-0.0745636	0.571137	0.596617	4.4612	0.436486	9.12143	2.80143	2.92641	0.044612	1.40071	1.4632	0.044612	-0.0754003	0.570851	0.3996	[-0.16882781]
615	1.435	0.4	-30	0	0	0	1.02572	0.948203	-0.0775189	0.571137	0.597584	4.63052	0.437902	9.47545	2.80143	2.93115	0.0463052	1.40071	1.46557	0.0463052	-0.0783888	0.57084	0.399584	[-0.16981624]
616	1.7095	0.1	-30	-30	0	0	1.22193	1.22193	0	0.285569	0.285569	0	0.1	-1.38778e-14	1.40071	1.40071	0	0.700357	0.700357	0	0	0.285569	0.1	[-0.14234526]
617	1.7095	0.1	-30	-29	0	0	1.22193	1.21942	-0.00250834	0.285569	0.287348	0.623201	0.10125	1.25029	1.40071	1.40944	0.00623201	0.700357	0.704722	0.00623201	-0.00253649	0.285549	0.099986	[-0.14508196]
618	1.7095	0.1	-30	-28	0	0	1.22193	1.21687	-0.00506406	0.285569	0.289139	1.25038	0.102516	2.51639	1.40071	1.41823	0.0125038	0.700357	0.709114	0.0125038	-0.00512088	0.285529	0.0999719	[-0.14777446]
619	1.7095	0.1	-30	-27	0	0	1.22193	1.21426	-0.00766638	0.285569	0.290941	1.88121	0.103798	3.7978	1.40071	1.42706	0.0188121	0.700357	0.713532	0.0188121	-0.0077524	0.285508	0.0999578	[-0.15042195]
620	1.7095	0.1	-30	-26	0	0	1.22193	1.21162	-0.0103145	0.285569	0.292752	2.51536	0.105094	5.09398	1.40071	1.43595	0.0251536	0.700357	0.717974	0.0251536	-0.0104302	0.285488	0.0999436	[-0.15302362]
621	1.7095	0.1	-30	-25	0	0	1.22193	1.20892	-0.0130076	0.285569	0.294571	3.15253	0.106404	6.40444	1.40071	1.44487	0.0315253	0.700357	0.722436	0.0315253	-0.0131536	0.285468	0.0999293	[-0.15557867]
622	1.7095	0.1	-30	-24	0	0	1.22193	1.20619	-0.015745	0.285569	0.296399	3.79241	0.107729	7.72865	1.40071	1.45383	0.0379241	0.700357	0.726917	0.0379241	-0.0159216	0.285447	0.0999149	[-0.15808634]
623	1.7095	0.1	-30	-23	0	0	1.22193	1.20341	-0.0185256	0.285569	0.298233	4.43473	0.109066	9.06614	1.40071	1.46283	0.0443473	0.700357	0.731416	0.0443473	-0.0187335	0.285427	0.0999005	[-0.16054585]
624	1.7095	0.1	-30	-22	0	0	1.22193	1.20058	-0.0213488	0.285569	0.300073	5.07921	0.110416	10.4164	1.40071	1.47186	0.0507921	0.700357	0.73593	0.0507921	-0.0215883	0.285406	0.099886	[-0.16295645]
625	1.7095	0.1	-30	-21	0	0	1.22193	1.19772	-0.0242136	0.285569	0.301919	5.72557	0.111779	11.779	1.40071	1.48091	0.0572557	0.700357	0.740457	0.0572557	-0.0244853	0.285385	0.0998715	[-0.16531742]
626	1.7095	0.1	-30	-20	0	0	1.22193	1.19481	-0.0271191	0.285569	0.30377	6.37356	0.113153	13.1534	1.40071	1.48999	0.0637356	0.700357	0.744995	0.0637356	-0.0274235	0.285364	0.099857	[-0.16762803]
627	1.7095	0.1	-30	-19	0	0	1.22193	1.19187	-0.0300646	0.285569	0.305624	7.02293	0.114539	14.5391	1.40071	1.49909	0.0702293	0.700357	0.749543	0.0702293	-0.030402	0.285344	0.0998425	[-0.16988758]
628	1.7095	0.1	-30	-18	0	0	1.22193	1.18888	-0.033049	0.285569	0.307482	7.67344	0.115936	15.9357	1.40071	1.5082	0.0767344	0.700357	0.754099	0.0767344	-0.0334199	0.285323	0.0998279	[-0.17209538]
629	1.7095	0.1	-30	-17	0	0	1.22193	1.18586	-0.0360716	0.285569	0.309342	8.32486	0.117343	17.3427	1.40071	1.51732	0.0832486	0.700357	0.758661	0.0832486	-0.0364763	0.285302	0.0998133	[-0.17425076]
630	1.7095	0.1	-30	-16	0	0	1.22193	1.1828	-0.0391312	0.285569	0.311204	8.97695	0.11876	18.7598	1.40071	1.52646	0.0897695	0.700357	0.763228	0.0897695	-0.0395703	0.285281	0.0997986	[-0.17635306]
631	1.7095	0.1	-30	-15	0	0	1.22193	1.1797	-0.0422271	0.285569	0.313067	9.62951	0.120186	20.1863	1.40071	1.5356	0.0962951	0.700357	0.767798	0.0962951	-0.042701	0.28526	0.099784	[-0.17840164]
632	1.7095	0.1	-30	-14	0	0	1.22193	1.17657	-0.0453583	0.285569	0.314932	10.2823	0.121622	21.6219	1.40071	1.54474	0.102823	0.700357	0.77237	0.102823	-0.0458673	0.285239	0.0997694	[-0.18039588]
633	1.7095	0.1	-30	-13	0	0	1.22193	1.17341	-0.0485238	0.285569	0.316796	10.9352	0.123066	23.0661	1.40071	1.55388	0.109352	0.700357	0.776942	0.109352	-0.0490683	0.285218	0.0997547	[-0.18233517]
634	1.7095	0.1	-30	-12	0	0	1.22193	1.17021	-0.0517227	0.285569	0.31866	11.5879	0.124519	24.5186	1.40071	1.56303	0.115879	0.700357	0.781514	0.115879	-0.0523031	0.285197	0.0997401	[-0.18421892]
635	1.7095	0.1	-30	-11	0	0	1.22193	1.16698	-0.0549539	0.285569	0.320523	12.2402	0.125979	25.9787	1.40071	1.57216	0.122402	0.700357	0.786082	0.122402	-0.0555706	0.285176	0.0997255	[-0.18604655]
636	1.7095	0.1	-30	-10	0	0	1.22193	1.16371	-0.0582166	0.285569	0.322384	12.8921	0.127446	27.4462	1.40071	1.5813	0.128921	0.700357	0.790648	0.128921	-0.0588699	0.285156	0.0997109	[-0.18781751]
637	1.7095	0.1	-30	-9	0	0	1.22193	1.16042	-0.0615097	0.285569	0.324244	13.5432	0.128921	28.9206	1.40071	1.59042	0.135432	0.700357	0.795208	0.135432	-0.0621999	0.285135	0.0996963	[-0.18953126]
638	1.7095	0.1	-30	-8	0	0	1.22193	1.1571	-0.0648322	0.285569	0.326101	14.1935	0.130402	30.4015	1.40071	1.59952	0.141935	0.700357	0.799762	0.141935	-0.0655596	0.285114	0.0996817	[-0.19118728]
639	1.7095	0.1	-30	-7	0	0	1.22193	1.15375	-0.068183	0.285569	0.327955	14.8427	0.131888	31.8885	1.40071	1.60862	0.148427	0.700357	0.804309	0.148427	-0.0689481	0.285093	0.0996672	[-0.19278506]
640	1.7095	0.1	-30	-6	0	0	1.22193	1.15037	-0.0715613	0.285569	0.329805	15.4907	0.133381	33.381	1.40071	1.61769	0.154907	0.700357	0.808847	0.154907	-0.0723643	0.285072	0.0996527	[-0.19432411]
641	1.7095	0.1	-30	-5	0	0	1.22193	1.14697	-0.0749659	0.285569	0.331652	16.1373	0.134879	34.8788	1.40071	1.62675	0.161373	0.700357	0.813376	0.161373	-0.0758071	0.285052	0.0996382	[-0.19580397]
642	1.7095	0.1	-30	-4	0	0	1.22193	1.14354	-0.0783958	0.285569	0.333494	16.7824	0.136381	36.3814	1.40071	1.63579	0.167824	0.700357	0.817894	0.167824	-0.0792755	0.285031	0.0996237	[-0.19722419]
643	1.7095	0.1	-30	-3	0	0	1.22193	1.14008	-0.08185	0.285569	0.335331	17.4259	0.137888	37.8884	1.40071	1.6448	0.174259	0.700357	0.8224	0.174259	-0.0827684	0.28501	0.0996093	[-0.19858433]
644	1.7095	0.1	-30	-2	0	0	1.22193	1.1366	-0.0853273	0.285569	0.337164	18.0675	0.139399	39.3993	1.40071	1.65379	0.180675	0.700357	0.826894	0.180675	-0.0862848	0.28499	0.0995949	[-0.19988398]
645	1.7095	0.1	-30	-1	0	0	1.22193	1.1331	-0.0888269	0.285569	0.33899	18.7071	0.140914	40.9139	1.40071	1.66275	0.187071	0.700357	0.831374	0.187071	-0.0898236	0.284969	0.0995806	[-0.20112275]
646	1.7095	0.1	-30	0	0	0	1.22193	1.12958	-0.0923475	0.285569	0.340811	19.3447	0.142432	42.4316	1.40071	1.67168	0.193447	0.700357	0.835839	0.193447	-0.0933837	0.284949	0.0995663	[-0.20230025]
647	1.7095	0.2	-30	-30	0	0	1.22193	1.22193	0	0.403855	0.403855	0	0.2	0	1.98091	1.98091	0	0.990454	0.990454	0	0	0.403855	0.2	[-0.14234526]
648	1.7095	0.2	-30	-29	0	0	1.22193	1.21942	-0.00250834	0.403855	0.405117	0.312565	0.201252	0.626108	1.98091	1.9871	0.00312565	0.990454	0.99355	0.00312565	-0.00253649	0.403841	0.199986	[-0.14508196]
649	1.7095	0.2	-30	-28	0	0	1.22193	1.21687	-0.00506406	0.403855	0.406395	0.62905	0.202524	1.26206	1.98091	1.99337	0.0062905	0.990454	0.996685	0.0062905	-0.00512088	0.403827	0.199972	[-0.14777446]
650	1.7095	0.2	-30	-27	0	0	1.22193	1.21426	-0.00766638	0.403855	0.407689	0.949286	0.203815	1.90758	1.98091	1.99971	0.00949286	0.990454	0.999857	0.00949286	-0.0077524	0.403812	0.199957	[-0.15042195]
651	1.7095	0.2	-30	-26	0	0	1.22193	1.21162	-0.0103145	0.403855	0.408997	1.27311	0.205125	2.56242	1.98091	2.00613	0.0127311	0.990454	1.00306	0.0127311	-0.0104302	0.403797	0.199943	[-0.15302362]
652	1.7095	0.2	-30	-25	0	0	1.22193	1.20892	-0.0130076	0.403855	0.410318	1.60034	0.206453	3.2263	1.98091	2.01261	0.0160034	0.990454	1.00631	0.0160034	-0.0131536	0.403782	0.199928	[-0.15557867]
653	1.7095	0.2	-30	-24	0	0	1.22193	1.20619	-0.015745	0.403855	0.411653	1.93084	0.207798	3.89896	1.98091	2.01916	0.0193084	0.990454	1.00958	0.0193084	-0.0159216	0.403768	0.199913	[-0.15808634]
654	1.7095	0.2	-30	-23	0	0	1.22193	1.20341	-0.0185256	0.403855	0.413	2.26443	0.20916	4.58013	1.98091	2.02577	0.0226443	0.990454	1.01288	0.0226443	-0.0187335	0.403752	0.199898	[-0.16054585]
655	1.7095	0.2	-30	-22	0	0	1.22193	1.20058	-0.0213488	0.403855	0.414359	2.60095	0.210539	5.26954	1.98091	2.03243	0.0260095	0.990454	1.01622	0.0260095	-0.0215883	0.403737	0.199883	[-0.16295645]
656	1.7095	0.2	-30	-21	0	0	1.22193	1.19772	-0.0242136	0.403855	0.415729	2.94025	0.211934	5.96694	1.98091	2.03915	0.0294025	0.990454	1.01958	0.0294025	-0.0244853	0.403722	0.199868	[-0.16531742]
657	1.7095	0.2	-30	-20	0	0	1.22193	1.19481	-0.0271191	0.403855	0.41711	3.28217	0.213344	6.67206	1.98091	2.04593	0.0328217	0.990454	1.02296	0.0328217	-0.0274235	0.403706	0.199853	[-0.16762803]
658	1.7095	0.2	-30	-19	0	0	1.22193	1.19187	-0.0300646	0.403855	0.418501	3.62656	0.214769	7.38463	1.98091	2.05275	0.0362656	0.990454	1.02637	0.0362656	-0.030402	0.403691	0.199837	[-0.16988758]
659	1.7095	0.2	-30	-18	0	0	1.22193	1.18888	-0.033049	0.403855	0.419901	3.97326	0.216209	8.10439	1.98091	2.05962	0.0397326	0.990454	1.02981	0.0397326	-0.0334199	0.403675	0.199822	[-0.17209538]
660	1.7095	0.2	-30	-17	0	0	1.22193	1.18586	-0.0360716	0.403855	0.42131	4.32214	0.217662	8.83108	1.98091	2.06653	0.0432214	0.990454	1.03326	0.0432214	-0.0364763	0.403659	0.199806	[-0.17425076]
661	1.7095	0.2	-30	-16	0	0	1.22193	1.1828	-0.0391312	0.403855	0.422727	4.67303	0.219129	9.56444	1.98091	2.07348	0.0467303	0.990454	1.03674	0.0467303	-0.0395703	0.403643	0.19979	[-0.17635306]
662	1.7095	0.2	-30	-15	0	0	1.22193	1.1797	-0.0422271	0.403855	0.424152	5.0258	0.220608	10.3042	1.98091	2.08047	0.050258	0.990454	1.04023	0.050258	-0.042701	0.403627	0.199774	[-0.17840164]
663	1.7095	0.2	-30	-14	0	0	1.22193	1.17657	-0.0453583	0.403855	0.425584	5.38031	0.2221	11.0501	1.98091	2.08749	0.0538031	0.990454	1.04374	0.0538031	-0.0458673	0.403611	0.199759	[-0.18039588]
664	1.7095	0.2	-30	-13	0	0	1.22193	1.17341	-0.0485238	0.403855	0.427022	5.73641	0.223604	11.8019	1.98091	2.09454	0.0573641	0.990454	1.04727	0.0573641	-0.0490683	0.403595	0.199743	[-0.18233517]
665	1.7095	0.2	-30	-12	0	0	1.22193	1.17021	-0.0517227	0.403855	0.428466	6.09397	0.225119	12.5593	1.98091	2.10162	0.0609397	0.990454	1.05081	0.0609397	-0.0523031	0.403579	0.199727	[-0.18421892]
666	1.7095	0.2	-30	-11	0	0	1.22193	1.16698	-0.0549539	0.403855	0.429915	6.45285	0.226644	13.3221	1.98091	2.10873	0.0645285	0.990454	1.05437	0.0645285	-0.0555706	0.403563	0.19971	[-0.18604655]
667	1.7095	0.2	-30	-10	0	0	1.22193	1.16371	-0.0582166	0.403855	0.431369	6.81292	0.22818	14.09	1.98091	2.11587	0.0681292	0.990454	1.05793	0.0681292	-0.0588699	0.403546	0.199694	[-0.18781751]
668	1.7095	0.2	-30	-9	0	0	1.22193	1.16042	-0.0615097	0.403855	0.432828	7.17404	0.229726	14.8628	1.98091	2.12302	0.0717404	0.990454	1.06151	0.0717404	-0.0621999	0.40353	0.199678	[-0.18953126]
669	1.7095	0.2	-30	-8	0	0	1.22193	1.1571	-0.0648322	0.403855	0.43429	7.53609	0.23128	15.6401	1.98091	2.13019	0.0753609	0.990454	1.0651	0.0753609	-0.0655596	0.403514	0.199662	[-0.19118728]
670	1.7095	0.2	-30	-7	0	0	1.22193	1.15375	-0.068183	0.403855	0.435755	7.89895	0.232844	16.4218	1.98091	2.13738	0.0789895	0.990454	1.06869	0.0789895	-0.0689481	0.403497	0.199646	[-0.19278506]
671	1.7095	0.2	-30	-6	0	0	1.22193	1.15037	-0.0715613	0.403855	0.437223	8.26248	0.234415	17.2076	1.98091	2.14458	0.0826248	0.990454	1.07229	0.0826248	-0.0723643	0.403481	0.199629	[-0.19432411]
672	1.7095	0.2	-30	-5	0	0	1.22193	1.14697	-0.0749659	0.403855	0.438694	8.62656	0.235995	17.9973	1.98091	2.15179	0.0862656	0.990454	1.0759	0.0862656	-0.0758071	0.403464	0.199613	[-0.19580397]
673	1.7095	0.2	-30	-4	0	0	1.22193	1.14354	-0.0783958	0.403855	0.440166	8.99108	0.237581	18.7906	1.98091	2.15901	0.0899108	0.990454	1.07951	0.0899108	-0.0792755	0.403448	0.199597	[-0.19722419]
674	1.7095	0.2	-30	-3	0	0	1.22193	1.14008	-0.08185	0.403855	0.441639	9.35591	0.239174	19.5872	1.98091	2.16624	0.0935591	0.990454	1.08312	0.0935591	-0.0827684	0.403431	0.19958	[-0.19858433]
675	1.7095	0.2	-30	-2	0	0	1.22193	1.1366	-0.0853273	0.403855	0.443114	9.72095	0.240774	20.3869	1.98091	2.17347	0.0972095	0.990454	1.08674	0.0972095	-0.0862848	0.403415	0.199564	[-0.19988398]
676	1.7095	0.2	-30	-1	0	0	1.22193	1.1331	-0.0888269	0.403855	0.444588	10.0861	0.242379	21.1894	1.98091	2.1807	0.100861	0.990454	1.09035	0.100861	-0.0898236	0.403398	0.199548	[-0.20112275]
677	1.7095	0.2	-30	0	0	0	1.22193	1.12958	-0.0923475	0.403855	0.446063	10.4512	0.243989	21.9946	1.98091	2.18794	0.104512	0.990454	1.09397	0.104512	-0.0933837	0.403381	0.199531	[-0.20230025]
678	1.7095	0.3	-30	-30	0	0	1.22193	1.22193	0	0.494619	0.494619	1.1223e-14	0.3	1.85037e-14	2.42611	2.42611	0	1.21305	1.21305	0	0	0.494619	0.3	[-0.14234526]
679	1.7095	0.3	-30	-29	0	0	1.22193	1.21942	-0.00250834	0.494619	0.495651	0.208593	0.301253	0.417621	2.42611	2.43117	0.00208593	1.21305	1.21558	0.00208593	-0.00253649	0.494608	0.299986	[-0.14508196]
680	1.7095	0.3	-30	-28	0	0	1.22193	1.21687	-0.00506406	0.494619	0.496698	0.420239	0.302527	0.842244	2.42611	2.4363	0.00420239	1.21305	1.21815	0.00420239	-0.00512088	0.494596	0.299972	[-0.14777446]
681	1.7095	0.3	-30	-27	0	0	1.22193	1.21426	-0.00766638	0.494619	0.497759	0.634835	0.303821	1.2737	2.42611	2.44151	0.00634835	1.21305	1.22075	0.00634835	-0.0077524	0.494584	0.299957	[-0.15042195]
682	1.7095	0.3	-30	-26	0	0	1.22193	1.21162	-0.0103145	0.494619	0.498835	0.852279	0.305135	1.71182	2.42611	2.44679	0.00852279	1.21305	1.22339	0.00852279	-0.0104302	0.494572	0.299943	[-0.15302362]
683	1.7095	0.3	-30	-25	0	0	1.22193	1.20892	-0.0130076	0.494619	0.499924	1.07247	0.306469	2.15644	2.42611	2.45213	0.0107247	1.21305	1.22606	0.0107247	-0.0131536	0.49456	0.299928	[-0.15557867]
684	1.7095	0.3	-30	-24	0	0	1.22193	1.20619	-0.015745	0.494619	0.501026	1.2953	0.307822	2.60738	2.42611	2.45753	0.012953	1.21305	1.22877	0.012953	-0.0159216	0.494547	0.299913	[-0.15808634]
685	1.7095	0.3	-30	-23	0	0	1.22193	1.20341	-0.0185256	0.494619	0.502141	1.52068	0.309193	3.06448	2.42611	2.463	0.0152068	1.21305	1.2315	0.0152068	-0.0187335	0.494535	0.299898	[-0.16054585]
686	1.7095	0.3	-30	-22	0	0	1.22193	1.20058	-0.0213488	0.494619	0.503268	1.74849	0.310583	3.52756	2.42611	2.46853	0.0174849	1.21305	1.23426	0.0174849	-0.0215883	0.494522	0.299882	[-0.16295645]
687	1.7095	0.3	-30	-21	0	0	1.22193	1.19772	-0.0242136	0.494619	0.504406	1.97865	0.311989	3.99645	2.42611	2.47411	0.0197865	1.21305	1.23706	0.0197865	-0.0244853	0.49451	0.299867	[-0.16531742]
688	1.7095	0.3	-30	-20	0	0	1.22193	1.19481	-0.0271191	0.494619	0.505556	2.21104	0.313413	4.47097	2.42611	2.47975	0.0221104	1.21305	1.23988	0.0221104	-0.0274235	0.494497	0.299851	[-0.16762803]
689	1.7095	0.3	-30	-19	0	0	1.22193	1.19187	-0.0300646	0.494619	0.506716	2.44558	0.314853	4.95096	2.42611	2.48544	0.0244558	1.21305	1.24272	0.0244558	-0.030402	0.494484	0.299835	[-0.16988758]
690	1.7095	0.3	-30	-18	0	0	1.22193	1.18888	-0.033049	0.494619	0.507886	2.68215	0.316309	5.43623	2.42611	2.49118	0.0268215	1.21305	1.24559	0.0268215	-0.0334199	0.494471	0.299819	[-0.17209538]
691	1.7095	0.3	-30	-17	0	0	1.22193	1.18586	-0.0360716	0.494619	0.509066	2.92066	0.31778	5.92662	2.42611	2.49697	0.0292066	1.21305	1.24848	0.0292066	-0.0364763	0.494457	0.299803	[-0.17425076]
692	1.7095	0.3	-30	-16	0	0	1.22193	1.1828	-0.0391312	0.494619	0.510254	3.16102	0.319266	6.42195	2.42611	2.5028	0.0316102	1.21305	1.2514	0.0316102	-0.0395703	0.494444	0.299787	[-0.17635306]
693	1.7095	0.3	-30	-15	0	0	1.22193	1.1797	-0.0422271	0.494619	0.511452	3.40312	0.320766	6.92204	2.42611	2.50867	0.0340312	1.21305	1.25434	0.0340312	-0.042701	0.49443	0.299771	[-0.17840164]
694	1.7095	0.3	-30	-14	0	0	1.22193	1.17657	-0.0453583	0.494619	0.512657	3.64686	0.32228	7.42672	2.42611	2.51458	0.0364686	1.21305	1.25729	0.0364686	-0.0458673	0.494417	0.299755	[-0.18039588]
695	1.7095	0.3	-30	-13	0	0	1.22193	1.17341	-0.0485238	0.494619	0.513871	3.89216	0.323807	7.93581	2.42611	2.52054	0.0389216	1.21305	1.26027	0.0389216	-0.0490683	0.494403	0.299738	[-0.18233517]
696	1.7095	0.3	-30	-12	0	0	1.22193	1.17021	-0.0517227	0.494619	0.515091	4.13892	0.325347	8.44914	2.42611	2.52652	0.0413892	1.21305	1.26326	0.0413892	-0.0523031	0.49439	0.299721	[-0.18421892]
697	1.7095	0.3	-30	-11	0	0	1.22193	1.16698	-0.0549539	0.494619	0.516318	4.38703	0.3269	8.96653	2.42611	2.53254	0.0438703	1.21305	1.26627	0.0438703	-0.0555706	0.494376	0.299705	[-0.18604655]
698	1.7095	0.3	-30	-10	0	0	1.22193	1.16371	-0.0582166	0.494619	0.517552	4.63642	0.328463	9.4878	2.42611	2.53859	0.0463642	1.21305	1.2693	0.0463642	-0.0588699	0.494362	0.299688	[-0.18781751]
699	1.7095	0.3	-30	-9	0	0	1.22193	1.16042	-0.0615097	0.494619	0.518791	4.88698	0.330038	10.0128	2.42611	2.54467	0.0488698	1.21305	1.27234	0.0488698	-0.0621999	0.494348	0.299671	[-0.18953126]
700	1.7095	0.3	-30	-8	0	0	1.22193	1.1571	-0.0648322	0.494619	0.520036	5.13863	0.331624	10.5413	2.42611	2.55078	0.0513863	1.21305	1.27539	0.0513863	-0.0655596	0.494334	0.299654	[-0.19118728]
701	1.7095	0.3	-30	-7	0	0	1.22193	1.15375	-0.068183	0.494619	0.521286	5.39126	0.33322	11.0732	2.42611	2.55691	0.0539126	1.21305	1.27845	0.0539126	-0.0689481	0.49432	0.299637	[-0.19278506]
702	1.7095	0.3	-30	-6	0	0	1.22193	1.15037	-0.0715613	0.494619	0.52254	5.6448	0.334825	11.6082	2.42611	2.56306	0.056448	1.21305	1.28153	0.056448	-0.0723643	0.494306	0.29962	[-0.19432411]
703	1.7095	0.3	-30	-5	0	0	1.22193	1.14697	-0.0749659	0.494619	0.523798	5.89916	0.336439	12.1463	2.42611	2.56923	0.0589916	1.21305	1.28461	0.0589916	-0.0758071	0.494292	0.299603	[-0.19580397]
704	1.7095	0.3	-30	-4	0	0	1.22193	1.14354	-0.0783958	0.494619	0.525059	6.15424	0.338062	12.6872	2.42611	2.57542	0.0615424	1.21305	1.28771	0.0615424	-0.0792755	0.494278	0.299586	[-0.19722419]
705	1.7095	0.3	-30	-3	0	0	1.22193	1.14008	-0.08185	0.494619	0.526324	6.40995	0.339692	13.2308	2.42611	2.58162	0.0640995	1.21305	1.29081	0.0640995	-0.0827684	0.494264	0.299569	[-0.19858433]
706	1.7095	0.3	-30	-2	0	0	1.22193	1.1366	-0.0853273	0.494619	0.527592	6.66623	0.341331	13.7768	2.42611	2.58784	0.0666623	1.21305	1.29392	0.0666623	-0.0862848	0.494249	0.299551	[-0.19988398]
707	1.7095	0.3	-30	-1	0	0	1.22193	1.1331	-0.0888269	0.494619	0.528862	6.92296	0.342976	14.3252	2.42611	2.59407	0.0692296	1.21305	1.29703	0.0692296	-0.0898236	0.494235	0.299534	[-0.20112275]
708	1.7095	0.3	-30	0	0	0	1.22193	1.12958	-0.0923475	0.494619	0.530133	7.18009	0.344627	14.8757	2.42611	2.6003	0.0718009	1.21305	1.30015	0.0718009	-0.0933837	0.494221	0.299517	[-0.20230025]
709	1.7095	0.4	-30	-30	0	0	1.22193	1.22193	0	0.571137	0.571137	0	0.4	-1.38778e-14	2.80143	2.80143	0	1.40071	1.40071	0	0	0.571137	0.4	[-0.14234526]
710	1.7095	0.4	-30	-29	0	0	1.22193	1.21942	-0.00250834	0.571137	0.572031	0.156526	0.401253	0.313297	2.80143	2.80581	0.00156526	1.40071	1.40291	0.00156526	-0.00253649	0.571127	0.399986	[-0.14508196]
711	1.7095	0.4	-30	-28	0	0	1.22193	1.21687	-0.00506406	0.571137	0.572939	0.315508	0.402528	0.632012	2.80143	2.81027	0.00315508	1.40071	1.40513	0.00315508	-0.00512088	0.571117	0.399972	[-0.14777446]
712	1.7095	0.4	-30	-27	0	0	1.22193	1.21426	-0.00766638	0.571137	0.573861	0.476875	0.403824	0.956023	2.80143	2.81479	0.00476875	1.40071	1.40739	0.00476875	-0.0077524	0.571107	0.399957	[-0.15042195]
713	1.7095	0.4	-30	-26	0	0	1.22193	1.21162	-0.0103145	0.571137	0.574796	0.640554	0.405141	1.28521	2.80143	2.81937	0.00640554	1.40071	1.40969	0.00640554	-0.0104302	0.571096	0.399943	[-0.15302362]
714	1.7095	0.4	-30	-25	0	0	1.22193	1.20892	-0.0130076	0.571137	0.575743	0.806474	0.406478	1.61945	2.80143	2.82402	0.00806474	1.40071	1.41201	0.00806474	-0.0131536	0.571086	0.399928	[-0.15557867]
715	1.7095	0.4	-30	-24	0	0	1.22193	1.20619	-0.015745	0.571137	0.576703	0.974562	0.407834	1.95862	2.80143	2.82873	0.00974562	1.40071	1.41436	0.00974562	-0.0159216	0.571075	0.399913	[-0.15808634]
716	1.7095	0.4	-30	-23	0	0	1.22193	1.20341	-0.0185256	0.571137	0.577675	1.14475	0.40921	2.3026	2.80143	2.8335	0.0114475	1.40071	1.41675	0.0114475	-0.0187335	0.571064	0.399897	[-0.16054585]
717	1.7095	0.4	-30	-22	0	0	1.22193	1.20058	-0.0213488	0.571137	0.578659	1.31695	0.410605	2.65125	2.80143	2.83832	0.0131695	1.40071	1.41916	0.0131695	-0.0215883	0.571053	0.399882	[-0.16295645]
718	1.7095	0.4	-30	-21	0	0	1.22193	1.19772	-0.0242136	0.571137	0.579654	1.49111	0.412018	3.00446	2.80143	2.8432	0.0149111	1.40071	1.4216	0.0149111	-0.0244853	0.571042	0.399866	[-0.16531742]
719	1.7095	0.4	-30	-20	0	0	1.22193	1.19481	-0.0271191	0.571137	0.580659	1.66715	0.413448	3.3621	2.80143	2.84813	0.0166715	1.40071	1.42407	0.0166715	-0.0274235	0.57103	0.39985	[-0.16762803]
720	1.7095	0.4	-30	-19	0	0	1.22193	1.19187	-0.0300646	0.571137	0.581675	1.845	0.414896	3.72404	2.80143	2.85311	0.01845	1.40071	1.42656	0.01845	-0.030402	0.571019	0.399834	[-0.16988758]
721	1.7095	0.4	-30	-18	0	0	1.22193	1.18888	-0.033049	0.571137	0.5827	2.02458	0.416361	4.09014	2.80143	2.85815	0.0202458	1.40071	1.42907	0.0202458	-0.0334199	0.571007	0.399818	[-0.17209538]
722	1.7095	0.4	-30	-17	0	0	1.22193	1.18586	-0.0360716	0.571137	0.583735	2.20582	0.417841	4.46029	2.80143	2.86322	0.0220582	1.40071	1.43161	0.0220582	-0.0364763	0.570996	0.399802	[-0.17425076]
723	1.7095	0.4	-30	-16	0	0	1.22193	1.1828	-0.0391312	0.571137	0.58478	2.38865	0.419337	4.83435	2.80143	2.86834	0.0238865	1.40071	1.43417	0.0238865	-0.0395703	0.570984	0.399786	[-0.17635306]
724	1.7095	0.4	-30	-15	0	0	1.22193	1.1797	-0.0422271	0.571137	0.585833	2.57299	0.420849	5.21219	2.80143	2.87351	0.0257299	1.40071	1.43675	0.0257299	-0.042701	0.570972	0.399769	[-0.17840164]
725	1.7095	0.4	-30	-14	0	0	1.22193	1.17657	-0.0453583	0.571137	0.586894	2.75879	0.422375	5.59368	2.80143	2.87871	0.0275879	1.40071	1.43936	0.0275879	-0.0458673	0.57096	0.399752	[-0.18039588]
726	1.7095	0.4	-30	-13	0	0	1.22193	1.17341	-0.0485238	0.571137	0.587963	2.94595	0.423915	5.97869	2.80143	2.88396	0.0294595	1.40071	1.44198	0.0294595	-0.0490683	0.570948	0.399736	[-0.18233517]
727	1.7095	0.4	-30	-12	0	0	1.22193	1.17021	-0.0517227	0.571137	0.589039	3.13442	0.425468	6.36709	2.80143	2.88924	0.0313442	1.40071	1.44462	0.0313442	-0.0523031	0.570936	0.399719	[-0.18421892]
728	1.7095	0.4	-30	-11	0	0	1.22193	1.16698	-0.0549539	0.571137	0.590123	3.32412	0.427035	6.75874	2.80143	2.89455	0.0332412	1.40071	1.44728	0.0332412	-0.0555706	0.570924	0.399702	[-0.18604655]
729	1.7095	0.4	-30	-10	0	0	1.22193	1.16371	-0.0582166	0.571137	0.591213	3.51499	0.428614	7.15352	2.80143	2.8999	0.0351499	1.40071	1.44995	0.0351499	-0.0588699	0.570912	0.399685	[-0.18781751]
730	1.7095	0.4	-30	-9	0	0	1.22193	1.16042	-0.0615097	0.571137	0.592309	3.70694	0.430205	7.5513	2.80143	2.90528	0.0370694	1.40071	1.45264	0.0370694	-0.0621999	0.5709	0.399667	[-0.18953126]
731	1.7095	0.4	-30	-8	0	0	1.22193	1.1571	-0.0648322	0.571137	0.593411	3.89992	0.431808	7.95193	2.80143	2.91068	0.0389992	1.40071	1.45534	0.0389992	-0.0655596	0.570887	0.39965	[-0.19118728]
732	1.7095	0.4	-30	-7	0	0	1.22193	1.15375	-0.068183	0.571137	0.594519	4.09384	0.433421	8.35528	2.80143	2.91611	0.0409384	1.40071	1.45806	0.0409384	-0.0689481	0.570875	0.399633	[-0.19278506]
733	1.7095	0.4	-30	-6	0	0	1.22193	1.15037	-0.0715613	0.571137	0.595631	4.28865	0.435045	8.76123	2.80143	2.92157	0.0428865	1.40071	1.46079	0.0428865	-0.0723643	0.570862	0.399615	[-0.19432411]
734	1.7095	0.4	-30	-5	0	0	1.22193	1.14697	-0.0749659	0.571137	0.596749	4.48428	0.436679	9.16965	2.80143	2.92705	0.0448428	1.40071	1.46353	0.0448428	-0.0758071	0.57085	0.399598	[-0.19580397]
735	1.7095	0.4	-30	-4	0	0	1.22193	1.14354	-0.0783958	0.571137	0.59787	4.68065	0.438322	9.58039	2.80143	2.93255	0.0468065	1.40071	1.46628	0.0468065	-0.0792755	0.570837	0.39958	[-0.19722419]
736	1.7095	0.4	-30	-3	0	0	1.22193	1.14008	-0.08185	0.571137	0.598996	4.8777	0.439973	9.99332	2.80143	2.93807	0.048777	1.40071	1.46904	0.048777	-0.0827684	0.570825	0.399562	[-0.19858433]
737	1.7095	0.4	-30	-2	0	0	1.22193	1.1366	-0.0853273	0.571137	0.600125	5.07537	0.441633	10.4083	2.80143	2.94361	0.0507537	1.40071	1.47181	0.0507537	-0.0862848	0.570812	0.399545	[-0.19988398]
738	1.7095	0.4	-30	-1	0	0	1.22193	1.1331	-0.0888269	0.571137	0.601257	5.27357	0.443301	10.8253	2.80143	2.94916	0.0527357	1.40071	1.47458	0.0527357	-0.0898236	0.570799	0.399527	[-0.20112275]
739	1.7095	0.4	-30	0	0	0	1.22193	1.12958	-0.0923475	0.571137	0.602391	5.47226	0.444976	11.244	2.80143	2.95473	0.0547226	1.40071	1.47736	0.0547226	-0.0933837	0.570787	0.399509	[-0.20230025]
740	1.984	0.1	-30	-30	0	0	1.41814	1.41814	0	0.285569	0.285569	0	0.1	-1.38778e-14	1.40071	1.40071	0	0.700357	0.700357	0	0	0.285569	0.1	[-0.16520211]
741	1.984	0.1	-30	-29	0	0	1.41814	1.41523	-0.00291111	0.285569	0.287632	0.722557	0.10145	1.45033	1.40071	1.41084	0.00722557	0.700357	0.705418	0.00722557	-0.00294378	0.285545	0.0999838	[-0.16837824]
742	1.984	0.1	-30	-28	0	0	1.41814	1.41226	-0.00587721	0.285569	0.289705	1.44833	0.102918	2.91763	1.40071	1.421	0.0144833	0.700357	0.710501	0.0144833	-0.00594316	0.285522	0.0999675	[-0.17150309]
743	1.984	0.1	-30	-27	0	0	1.41814	1.40924	-0.00889739	0.285569	0.291785	2.17696	0.104401	4.40131	1.40071	1.43121	0.0217696	0.700357	0.715604	0.0217696	-0.00899723	0.285499	0.0999512	[-0.17457569]
744	1.984	0.1	-30	-26	0	0	1.41814	1.40617	-0.0119707	0.285569	0.293873	2.90811	0.105901	5.9008	1.40071	1.44145	0.0290811	0.700357	0.720724	0.0290811	-0.0121051	0.285475	0.0999347	[-0.17759512]
745	1.984	0.1	-30	-25	0	0	1.41814	1.40304	-0.0150963	0.285569	0.295968	3.64148	0.107416	7.41556	1.40071	1.45172	0.0364148	0.700357	0.72586	0.0364148	-0.0152657	0.285452	0.0999183	[-0.18056045]
746	1.984	0.1	-30	-24	0	0	1.41814	1.39987	-0.0182732	0.285569	0.298067	4.37673	0.108945	8.94503	1.40071	1.46202	0.0437673	0.700357	0.73101	0.0437673	-0.0184782	0.285428	0.0999018	[-0.18347078]
747	1.984	0.1	-30	-23	0	0	1.41814	1.39664	-0.0215003	0.285569	0.300171	5.11359	0.110489	10.4887	1.40071	1.47234	0.0511359	0.700357	0.73617	0.0511359	-0.0217416	0.285405	0.0998853	[-0.18632522]
748	1.984	0.1	-30	-22	0	0	1.41814	1.39336	-0.0247768	0.285569	0.302279	5.85177	0.112046	12.046	1.40071	1.48268	0.0585177	0.700357	0.74134	0.0585177	-0.0250548	0.285381	0.0998687	[-0.1891229]
749	1.984	0.1	-30	-21	0	0	1.41814	1.39004	-0.0281016	0.285569	0.30439	6.591	0.113616	13.6164	1.40071	1.49304	0.06591	0.700357	0.746518	0.06591	-0.028417	0.285357	0.0998521	[-0.19186298]
750	1.984	0.1	-30	-20	0	0	1.41814	1.38667	-0.0314738	0.285569	0.306504	7.331	0.115199	15.1994	1.40071	1.5034	0.07331	0.700357	0.7517	0.07331	-0.0318269	0.285334	0.0998355	[-0.19454461]
751	1.984	0.1	-30	-19	0	0	1.41814	1.38325	-0.0348922	0.285569	0.308618	8.07155	0.116795	16.7946	1.40071	1.51377	0.0807155	0.700357	0.756887	0.0807155	-0.0352837	0.28531	0.0998189	[-0.19716699]
752	1.984	0.1	-30	-18	0	0	1.41814	1.37978	-0.0383558	0.285569	0.310734	8.81238	0.118401	18.4013	1.40071	1.52415	0.0881238	0.700357	0.762075	0.0881238	-0.0387862	0.285286	0.0998023	[-0.1997293]
753	1.984	0.1	-30	-17	0	0	1.41814	1.37628	-0.0418637	0.285569	0.31285	9.55327	0.120019	20.0192	1.40071	1.53453	0.0955327	0.700357	0.767264	0.0955327	-0.0423334	0.285263	0.0997857	[-0.20223078]
754	1.984	0.1	-30	-16	0	0	1.41814	1.37273	-0.0454147	0.285569	0.314965	10.294	0.121648	21.6477	1.40071	1.5449	0.10294	0.700357	0.772452	0.10294	-0.0459243	0.285239	0.0997691	[-0.20467065]
755	1.984	0.1	-30	-15	0	0	1.41814	1.36913	-0.0490077	0.285569	0.317079	11.0344	0.123286	23.2863	1.40071	1.55527	0.110344	0.700357	0.777637	0.110344	-0.0495576	0.285215	0.0997525	[-0.20704818]
756	1.984	0.1	-30	-14	0	0	1.41814	1.3655	-0.0526416	0.285569	0.319192	11.7741	0.124935	24.9345	1.40071	1.56564	0.117741	0.700357	0.782818	0.117741	-0.0532323	0.285191	0.0997359	[-0.20936264]
757	1.984	0.1	-30	-13	0	0	1.41814	1.36183	-0.0563154	0.285569	0.321302	12.5131	0.126592	26.5919	1.40071	1.57599	0.125131	0.700357	0.787993	0.125131	-0.0569474	0.285168	0.0997194	[-0.21161332]
758	1.984	0.1	-30	-12	0	0	1.41814	1.35811	-0.060028	0.285569	0.32341	13.2511	0.128258	28.2581	1.40071	1.58632	0.132511	0.700357	0.793162	0.132511	-0.0607015	0.285144	0.0997028	[-0.21379955]
759	1.984	0.1	-30	-11	0	0	1.41814	1.35436	-0.0637781	0.285569	0.325514	13.9879	0.129932	29.9324	1.40071	1.59664	0.139879	0.700357	0.798322	0.139879	-0.0644937	0.28512	0.0996863	[-0.21592065]
760	1.984	0.1	-30	-10	0	0	1.41814	1.35058	-0.0675646	0.285569	0.327614	14.7234	0.131615	31.6145	1.40071	1.60695	0.147234	0.700357	0.803473	0.147234	-0.0683228	0.285097	0.0996699	[-0.21797598]
761	1.984	0.1	-30	-9	0	0	1.41814	1.34675	-0.0713865	0.285569	0.32971	15.4573	0.133304	33.304	1.40071	1.61723	0.154573	0.700357	0.808614	0.154573	-0.0721875	0.285073	0.0996534	[-0.21996491]
762	1.984	0.1	-30	-8	0	0	1.41814	1.3429	-0.0752425	0.285569	0.331801	16.1896	0.135	35.0002	1.40071	1.62748	0.161896	0.700357	0.813742	0.161896	-0.0760868	0.28505	0.099637	[-0.22188684]
763	1.984	0.1	-30	-7	0	0	1.41814	1.33901	-0.0791314	0.285569	0.333887	16.92	0.136703	36.7028	1.40071	1.63771	0.1692	0.700357	0.818857	0.1692	-0.0800193	0.285026	0.0996206	[-0.22374118]
764	1.984	0.1	-30	-6	0	0	1.41814	1.33509	-0.0830521	0.285569	0.335967	17.6484	0.138411	38.4114	1.40071	1.64792	0.176484	0.700357	0.823959	0.176484	-0.083984	0.285003	0.0996043	[-0.22552737]
765	1.984	0.1	-30	-5	0	0	1.41814	1.33114	-0.0870034	0.285569	0.338041	18.3746	0.140125	40.1254	1.40071	1.65809	0.183746	0.700357	0.829045	0.183746	-0.0879797	0.28498	0.0995881	[-0.22724486]
766	1.984	0.1	-30	-4	0	0	1.41814	1.32716	-0.0909841	0.285569	0.340108	19.0985	0.141845	41.8445	1.40071	1.66823	0.190985	0.700357	0.834115	0.190985	-0.092005	0.284957	0.0995719	[-0.22889312]
767	1.984	0.1	-30	-3	0	0	1.41814	1.32315	-0.0949929	0.285569	0.342168	19.8199	0.143568	43.5681	1.40071	1.67833	0.198199	0.700357	0.839167	0.198199	-0.0960588	0.284934	0.0995557	[-0.23047167]
768	1.984	0.1	-30	-2	0	0	1.41814	1.31911	-0.0990286	0.285569	0.344221	20.5388	0.145296	45.2959	1.40071	1.6884	0.205388	0.700357	0.844202	0.205388	-0.10014	0.28491	0.0995396	[-0.23198001]
769	1.984	0.1	-30	-1	0	0	1.41814	1.31505	-0.10309	0.285569	0.346266	21.2548	0.147027	47.0274	1.40071	1.69843	0.212548	0.700357	0.849217	0.212548	-0.104247	0.284888	0.0995236	[-0.23341768]
770	1.984	0.1	-30	0	0	0	1.41814	1.31096	-0.107176	0.285569	0.348302	21.9681	0.148762	48.7621	1.40071	1.70842	0.219681	0.700357	0.854212	0.219681	-0.108379	0.284865	0.0995076	[-0.23478426]
771	1.984	0.2	-30	-30	0	0	1.41814	1.41814	0	0.403855	0.403855	0	0.2	0	1.98091	1.98091	0	0.990454	0.990454	0	0	0.403855	0.2	[-0.16520211]
772	1.984	0.2	-30	-29	0	0	1.41814	1.41523	-0.00291111	0.403855	0.405319	0.362574	0.201453	0.726463	1.98091	1.98809	0.00362574	0.990454	0.994046	0.00362574	-0.00294378	0.403839	0.199984	[-0.16837824]
773	1.984	0.2	-30	-28	0	0	1.41814	1.41226	-0.00587721	0.403855	0.4068	0.729332	0.202928	1.46398	1.98091	1.99536	0.00729332	0.990454	0.997678	0.00729332	-0.00594316	0.403822	0.199967	[-0.17150309]
774	1.984	0.2	-30	-27	0	0	1.41814	1.40924	-0.00889739	0.403855	0.408298	1.10007	0.204424	2.21225	1.98091	2.0027	0.0110007	0.990454	1.00135	0.0110007	-0.00899723	0.403805	0.199951	[-0.17457569]
775	1.984	0.2	-30	-26	0	0	1.41814	1.40617	-0.0119707	0.403855	0.40981	1.4746	0.205942	2.97094	1.98091	2.01012	0.014746	0.990454	1.00506	0.014746	-0.0121051	0.403788	0.199934	[-0.17759512]
776	1.984	0.2	-30	-25	0	0	1.41814	1.40304	-0.0150963	0.403855	0.411337	1.85271	0.20748	3.73975	1.98091	2.01761	0.0185271	0.990454	1.0088	0.0185271	-0.0152657	0.403771	0.199917	[-0.18056045]
777	1.984	0.2	-30	-24	0	0	1.41814	1.39987	-0.0182732	0.403855	0.412878	2.23423	0.209037	4.51838	1.98091	2.02517	0.0223423	0.990454	1.01258	0.0223423	-0.0184782	0.403754	0.1999	[-0.18347078]
778	1.984	0.2	-30	-23	0	0	1.41814	1.39664	-0.0215003	0.403855	0.414432	2.61895	0.210613	5.30649	1.98091	2.03279	0.0261895	0.990454	1.01639	0.0261895	-0.0217416	0.403736	0.199882	[-0.18632522]
779	1.984	0.2	-30	-22	0	0	1.41814	1.39336	-0.0247768	0.403855	0.415998	3.0067	0.212208	6.1038	1.98091	2.04047	0.030067	0.990454	1.02023	0.030067	-0.0250548	0.403719	0.199865	[-0.1891229]
780	1.984	0.2	-30	-21	0	0	1.41814	1.39004	-0.0281016	0.403855	0.417575	3.39729	0.21382	6.90999	1.98091	2.04821	0.0339729	0.990454	1.0241	0.0339729	-0.028417	0.403701	0.199848	[-0.19186298]
781	1.984	0.2	-30	-20	0	0	1.41814	1.38667	-0.0314738	0.403855	0.419163	3.79054	0.21545	7.72476	1.98091	2.056	0.0379054	0.990454	1.028	0.0379054	-0.0318269	0.403683	0.19983	[-0.19454461]
782	1.984	0.2	-30	-19	0	0	1.41814	1.38325	-0.0348922	0.403855	0.420761	4.18627	0.217096	8.5478	1.98091	2.06384	0.0418627	0.990454	1.03192	0.0418627	-0.0352837	0.403665	0.199812	[-0.19716699]
783	1.984	0.2	-30	-18	0	0	1.41814	1.37978	-0.0383558	0.403855	0.422369	4.58432	0.218758	9.3788	1.98091	2.07172	0.0458432	0.990454	1.03586	0.0458432	-0.0387862	0.403647	0.199794	[-0.1997293]
784	1.984	0.2	-30	-17	0	0	1.41814	1.37628	-0.0418637	0.403855	0.423985	4.98451	0.220435	10.2175	1.98091	2.07965	0.0498451	0.990454	1.03982	0.0498451	-0.0423334	0.403629	0.199776	[-0.20223078]
785	1.984	0.2	-30	-16	0	0	1.41814	1.37273	-0.0454147	0.403855	0.425609	5.38667	0.222127	11.0635	1.98091	2.08761	0.0538667	0.990454	1.04381	0.0538667	-0.0459243	0.403611	0.199758	[-0.20467065]
786	1.984	0.2	-30	-15	0	0	1.41814	1.36913	-0.0490077	0.403855	0.427241	5.79064	0.223833	11.9166	1.98091	2.09562	0.0579064	0.990454	1.04781	0.0579064	-0.0495576	0.403593	0.19974	[-0.20704818]
787	1.984	0.2	-30	-14	0	0	1.41814	1.3655	-0.0526416	0.403855	0.428879	6.19627	0.225553	12.7765	1.98091	2.10365	0.0619627	0.990454	1.05183	0.0619627	-0.0532323	0.403574	0.199722	[-0.20936264]
788	1.984	0.2	-30	-13	0	0	1.41814	1.36183	-0.0563154	0.403855	0.430523	6.60338	0.227286	13.6428	1.98091	2.11172	0.0660338	0.990454	1.05586	0.0660338	-0.0569474	0.403556	0.199704	[-0.21161332]
789	1.984	0.2	-30	-12	0	0	1.41814	1.35811	-0.060028	0.403855	0.432173	7.01184	0.229031	14.5153	1.98091	2.11981	0.0701184	0.990454	1.0599	0.0701184	-0.0607015	0.403537	0.199685	[-0.21379955]
790	1.984	0.2	-30	-11	0	0	1.41814	1.35436	-0.0637781	0.403855	0.433827	7.42148	0.230787	15.3937	1.98091	2.12792	0.0742148	0.990454	1.06396	0.0742148	-0.0644937	0.403519	0.199667	[-0.21592065]
791	1.984	0.2	-30	-10	0	0	1.41814	1.35058	-0.0675646	0.403855	0.435486	7.83215	0.232555	16.2777	1.98091	2.13606	0.0783215	0.990454	1.06803	0.0783215	-0.0683228	0.4035	0.199649	[-0.21797598]
792	1.984	0.2	-30	-9	0	0	1.41814	1.34675	-0.0713865	0.403855	0.437148	8.24372	0.234334	17.167	1.98091	2.14421	0.0824372	0.990454	1.0721	0.0824372	-0.0721875	0.403481	0.19963	[-0.21996491]
793	1.984	0.2	-30	-8	0	0	1.41814	1.3429	-0.0752425	0.403855	0.438813	8.65604	0.236123	18.0613	1.98091	2.15238	0.0865604	0.990454	1.07619	0.0865604	-0.0760868	0.403463	0.199612	[-0.22188684]
794	1.984	0.2	-30	-7	0	0	1.41814	1.33901	-0.0791314	0.403855	0.44048	9.06896	0.237921	18.9604	1.98091	2.16056	0.0906896	0.990454	1.08028	0.0906896	-0.0800193	0.403444	0.199593	[-0.22374118]
795	1.984	0.2	-30	-6	0	0	1.41814	1.33509	-0.0830521	0.403855	0.44215	9.48236	0.239728	19.8639	1.98091	2.16875	0.0948236	0.990454	1.08437	0.0948236	-0.083984	0.403425	0.199575	[-0.22552737]
796	1.984	0.2	-30	-5	0	0	1.41814	1.33114	-0.0870034	0.403855	0.443821	9.8961	0.241543	20.7715	1.98091	2.17694	0.098961	0.990454	1.08847	0.098961	-0.0879797	0.403407	0.199556	[-0.22724486]
797	1.984	0.2	-30	-4	0	0	1.41814	1.32716	-0.0909841	0.403855	0.445493	10.31	0.243366	21.683	1.98091	2.18514	0.1031	0.990454	1.09257	0.1031	-0.092005	0.403388	0.199538	[-0.22889312]
798	1.984	0.2	-30	-3	0	0	1.41814	1.32315	-0.0949929	0.403855	0.447165	10.7241	0.245196	22.5982	1.98091	2.19334	0.107241	0.990454	1.09667	0.107241	-0.0960588	0.403369	0.199519	[-0.23047167]
799	1.984	0.2	-30	-2	0	0	1.41814	1.31911	-0.0990286	0.403855	0.448836	11.138	0.247033	23.5166	1.98091	2.20154	0.11138	0.990454	1.10077	0.11138	-0.10014	0.40335	0.1995	[-0.23198001]
800	1.984	0.2	-30	-1	0	0	1.41814	1.31505	-0.10309	0.403855	0.450508	11.5518	0.248876	24.4381	1.98091	2.20974	0.115518	0.990454	1.10487	0.115518	-0.104247	0.403332	0.199482	[-0.23341768]
801	1.984	0.2	-30	0	0	0	1.41814	1.31096	-0.107176	0.403855	0.452178	11.9653	0.250725	25.3623	1.98091	2.21793	0.119653	0.990454	1.10897	0.119653	-0.108379	0.403313	0.199463	[-0.23478426]
802	1.984	0.3	-30	-30	0	0	1.41814	1.41814	0	0.494619	0.494619	1.1223e-14	0.3	1.85037e-14	2.42611	2.42611	0	1.21305	1.21305	0	0	0.494619	0.3	[-0.16520211]
803	1.984	0.3	-30	-29	0	0	1.41814	1.41523	-0.00291111	0.494619	0.495816	0.242007	0.301454	0.4846	2.42611	2.43198	0.00242007	1.21305	1.21599	0.00242007	-0.00294378	0.494606	0.299984	[-0.16837824]
804	1.984	0.3	-30	-28	0	0	1.41814	1.41226	-0.00587721	0.494619	0.49703	0.487392	0.302931	0.97716	2.42611	2.43793	0.00487392	1.21305	1.21897	0.00487392	-0.00594316	0.494592	0.299967	[-0.17150309]
805	1.984	0.3	-30	-27	0	0	1.41814	1.40924	-0.00889739	0.494619	0.49826	0.736032	0.304432	1.47748	2.42611	2.44396	0.00736032	1.21305	1.22198	0.00736032	-0.00899723	0.494579	0.29995	[-0.17457569]
806	1.984	0.3	-30	-26	0	0	1.41814	1.40617	-0.0119707	0.494619	0.499505	0.987804	0.305956	1.98537	2.42611	2.45007	0.00987804	1.21305	1.22504	0.00987804	-0.0121051	0.494565	0.299933	[-0.17759512]
807	1.984	0.3	-30	-25	0	0	1.41814	1.40304	-0.0150963	0.494619	0.500765	1.24259	0.307502	2.50061	2.42611	2.45625	0.0124259	1.21305	1.22813	0.0124259	-0.0152657	0.49455	0.299916	[-0.18056045]
808	1.984	0.3	-30	-24	0	0	1.41814	1.39987	-0.0182732	0.494619	0.50204	1.50026	0.309069	3.02302	2.42611	2.46251	0.0150026	1.21305	1.23125	0.0150026	-0.0184782	0.494536	0.299899	[-0.18347078]
809	1.984	0.3	-30	-23	0	0	1.41814	1.39664	-0.0215003	0.494619	0.503328	1.76069	0.310657	3.55239	2.42611	2.46882	0.0176069	1.21305	1.23441	0.0176069	-0.0217416	0.494522	0.299881	[-0.18632522]
810	1.984	0.3	-30	-22	0	0	1.41814	1.39336	-0.0247768	0.494619	0.504629	2.02378	0.312266	4.08851	2.42611	2.47521	0.0202378	1.21305	1.2376	0.0202378	-0.0250548	0.494507	0.299864	[-0.1891229]
811	1.984	0.3	-30	-21	0	0	1.41814	1.39004	-0.0281016	0.494619	0.505943	2.28939	0.313894	4.63119	2.42611	2.48165	0.0228939	1.21305	1.24083	0.0228939	-0.028417	0.494492	0.299846	[-0.19186298]
812	1.984	0.3	-30	-20	0	0	1.41814	1.38667	-0.0314738	0.494619	0.507269	2.55741	0.315541	5.18022	2.42611	2.48815	0.0255741	1.21305	1.24408	0.0255741	-0.0318269	0.494477	0.299828	[-0.19454461]
813	1.984	0.3	-30	-19	0	0	1.41814	1.38325	-0.0348922	0.494619	0.508606	2.82772	0.317206	5.7354	2.42611	2.49471	0.0282772	1.21305	1.24736	0.0282772	-0.0352837	0.494462	0.29981	[-0.19716699]
814	1.984	0.3	-30	-18	0	0	1.41814	1.37978	-0.0383558	0.494619	0.509954	3.10021	0.31889	6.29653	2.42611	2.50132	0.0310021	1.21305	1.25066	0.0310021	-0.0387862	0.494447	0.299791	[-0.1997293]
815	1.984	0.3	-30	-17	0	0	1.41814	1.37628	-0.0418637	0.494619	0.511312	3.37475	0.32059	6.86339	2.42611	2.50798	0.0337475	1.21305	1.25399	0.0337475	-0.0423334	0.494432	0.299773	[-0.20223078]
816	1.984	0.3	-30	-16	0	0	1.41814	1.37273	-0.0454147	0.494619	0.512679	3.65124	0.322307	7.4358	2.42611	2.51469	0.0365124	1.21305	1.25735	0.0365124	-0.0459243	0.494417	0.299754	[-0.20467065]
817	1.984	0.3	-30	-15	0	0	1.41814	1.36913	-0.0490077	0.494619	0.514056	3.92956	0.324041	8.01353	2.42611	2.52144	0.0392956	1.21305	1.26072	0.0392956	-0.0495576	0.494401	0.299735	[-0.20704818]
818	1.984	0.3	-30	-14	0	0	1.41814	1.3655	-0.0526416	0.494619	0.515441	4.2096	0.325789	8.5964	2.42611	2.52824	0.042096	1.21305	1.26412	0.042096	-0.0532323	0.494386	0.299717	[-0.20936264]
819	1.984	0.3	-30	-13	0	0	1.41814	1.36183	-0.0563154	0.494619	0.516834	4.49124	0.327553	9.18419	2.42611	2.53507	0.0449124	1.21305	1.26754	0.0449124	-0.0569474	0.49437	0.299698	[-0.21161332]
820	1.984	0.3	-30	-12	0	0	1.41814	1.35811	-0.060028	0.494619	0.518234	4.77438	0.32933	9.77671	2.42611	2.54194	0.0477438	1.21305	1.27097	0.0477438	-0.0607015	0.494354	0.299679	[-0.21379955]
821	1.984	0.3	-30	-11	0	0	1.41814	1.35436	-0.0637781	0.494619	0.519642	5.05891	0.331121	10.3738	2.42611	2.54884	0.0505891	1.21305	1.27442	0.0505891	-0.0644937	0.494339	0.29966	[-0.21592065]
822	1.984	0.3	-30	-10	0	0	1.41814	1.35058	-0.0675646	0.494619	0.521055	5.34473	0.332925	10.9751	2.42611	2.55578	0.0534473	1.21305	1.27789	0.0534473	-0.0683228	0.494323	0.29964	[-0.21797598]
823	1.984	0.3	-30	-9	0	0	1.41814	1.34675	-0.0713865	0.494619	0.522475	5.63171	0.334742	11.5806	2.42611	2.56274	0.0563171	1.21305	1.28137	0.0563171	-0.0721875	0.494307	0.299621	[-0.21996491]
824	1.984	0.3	-30	-8	0	0	1.41814	1.3429	-0.0752425	0.494619	0.5239	5.91977	0.33657	12.19	2.42611	2.56973	0.0591977	1.21305	1.28486	0.0591977	-0.0760868	0.494291	0.299602	[-0.22188684]
825	1.984	0.3	-30	-7	0	0	1.41814	1.33901	-0.0791314	0.494619	0.525329	6.20879	0.338409	12.8031	2.42611	2.57674	0.0620879	1.21305	1.28837	0.0620879	-0.0800193	0.494275	0.299582	[-0.22374118]
826	1.984	0.3	-30	-6	0	0	1.41814	1.33509	-0.0830521	0.494619	0.526763	6.49868	0.340259	13.4197	2.42611	2.58377	0.0649868	1.21305	1.29189	0.0649868	-0.083984	0.494259	0.299563	[-0.22552737]
827	1.984	0.3	-30	-5	0	0	1.41814	1.33114	-0.0870034	0.494619	0.528201	6.78933	0.342119	14.0396	2.42611	2.59082	0.0678933	1.21305	1.29541	0.0678933	-0.0879797	0.494243	0.299543	[-0.22724486]
828	1.984	0.3	-30	-4	0	0	1.41814	1.32716	-0.0909841	0.494619	0.529642	7.08065	0.343988	14.6627	2.42611	2.59789	0.0708065	1.21305	1.29895	0.0708065	-0.092005	0.494226	0.299523	[-0.22889312]
829	1.984	0.3	-30	-3	0	0	1.41814	1.32315	-0.0949929	0.494619	0.531085	7.37253	0.345866	15.2886	2.42611	2.60497	0.0737253	1.21305	1.30249	0.0737253	-0.0960588	0.49421	0.299504	[-0.23047167]
830	1.984	0.3	-30	-2	0	0	1.41814	1.31911	-0.0990286	0.494619	0.532531	7.66488	0.347752	15.9173	2.42611	2.61207	0.0766488	1.21305	1.30603	0.0766488	-0.10014	0.494194	0.299484	[-0.23198001]
831	1.984	0.3	-30	-1	0	0	1.41814	1.31505	-0.10309	0.494619	0.533979	7.95761	0.349645	16.5484	2.42611	2.61917	0.0795761	1.21305	1.30958	0.0795761	-0.104247	0.494178	0.299464	[-0.23341768]
832	1.984	0.3	-30	0	0	0	1.41814	1.31096	-0.107176	0.494619	0.535428	8.25061	0.351546	17.1819	2.42611	2.62628	0.0825061	1.21305	1.31314	0.0825061	-0.108379	0.494161	0.299445	[-0.23478426]
833	1.984	0.4	-30	-30	0	0	1.41814	1.41814	0	0.571137	0.571137	0	0.4	-1.38778e-14	2.80143	2.80143	0	1.40071	1.40071	0	0	0.571137	0.4	[-0.16520211]
834	1.984	0.4	-30	-29	0	0	1.41814	1.41523	-0.00291111	0.571137	0.572175	0.181615	0.401454	0.363559	2.80143	2.80652	0.00181615	1.40071	1.40326	0.00181615	-0.00294378	0.571126	0.399984	[-0.16837824]
835	1.984	0.4	-30	-28	0	0	1.41814	1.41226	-0.00587721	0.571137	0.573228	0.365986	0.402933	0.733312	2.80143	2.81168	0.00365986	1.40071	1.40584	0.00365986	-0.00594316	0.571114	0.399967	[-0.17150309]
836	1.984	0.4	-30	-27	0	0	1.41814	1.40924	-0.00889739	0.571137	0.574296	0.553029	0.404436	1.10912	2.80143	2.81692	0.00553029	1.40071	1.40846	0.00553029	-0.00899723	0.571102	0.39995	[-0.17457569]
837	1.984	0.4	-30	-26	0	0	1.41814	1.40617	-0.0119707	0.571137	0.575379	0.742656	0.405963	1.49083	2.80143	2.82223	0.00742656	1.40071	1.41112	0.00742656	-0.0121051	0.57109	0.399933	[-0.17759512]
838	1.984	0.4	-30	-25	0	0	1.41814	1.40304	-0.0150963	0.571137	0.576476	0.934782	0.407513	1.8783	2.80143	2.82762	0.00934782	1.40071	1.41381	0.00934782	-0.0152657	0.571077	0.399916	[-0.18056045]
839	1.984	0.4	-30	-24	0	0	1.41814	1.39987	-0.0182732	0.571137	0.577587	1.12932	0.409086	2.27139	2.80143	2.83307	0.0112932	1.40071	1.41653	0.0112932	-0.0184782	0.571065	0.399899	[-0.18347078]
840	1.984	0.4	-30	-23	0	0	1.41814	1.39664	-0.0215003	0.571137	0.578712	1.32618	0.41068	2.66995	2.80143	2.83858	0.0132618	1.40071	1.41929	0.0132618	-0.0217416	0.571052	0.399881	[-0.18632522]
841	1.984	0.4	-30	-22	0	0	1.41814	1.39336	-0.0247768	0.571137	0.579849	1.52529	0.412295	3.07384	2.80143	2.84416	0.0152529	1.40071	1.42208	0.0152529	-0.0250548	0.571039	0.399863	[-0.1891229]
842	1.984	0.4	-30	-21	0	0	1.41814	1.39004	-0.0281016	0.571137	0.580998	1.72654	0.413932	3.48289	2.80143	2.8498	0.0172654	1.40071	1.4249	0.0172654	-0.028417	0.571027	0.399845	[-0.19186298]
843	1.984	0.4	-30	-20	0	0	1.41814	1.38667	-0.0314738	0.571137	0.582159	1.92987	0.415588	3.89698	2.80143	2.85549	0.0192987	1.40071	1.42775	0.0192987	-0.0318269	0.571014	0.399827	[-0.19454461]
844	1.984	0.4	-30	-19	0	0	1.41814	1.38325	-0.0348922	0.571137	0.583332	2.13517	0.417264	4.31593	2.80143	2.86124	0.0213517	1.40071	1.43062	0.0213517	-0.0352837	0.571	0.399808	[-0.19716699]
845	1.984	0.4	-30	-18	0	0	1.41814	1.37978	-0.0383558	0.571137	0.584515	2.34237	0.418958	4.73961	2.80143	2.86705	0.0234237	1.40071	1.43352	0.0234237	-0.0387862	0.570987	0.39979	[-0.1997293]
846	1.984	0.4	-30	-17	0	0	1.41814	1.37628	-0.0418637	0.571137	0.585709	2.55138	0.420671	5.16787	2.80143	2.8729	0.0255138	1.40071	1.43645	0.0255138	-0.0423334	0.570974	0.399771	[-0.20223078]
847	1.984	0.4	-30	-16	0	0	1.41814	1.37273	-0.0454147	0.571137	0.586913	2.76212	0.422402	5.60054	2.80143	2.87881	0.0276212	1.40071	1.4394	0.0276212	-0.0459243	0.57096	0.399752	[-0.20467065]
848	1.984	0.4	-30	-15	0	0	1.41814	1.36913	-0.0490077	0.571137	0.588126	2.9745	0.42415	6.03748	2.80143	2.88476	0.029745	1.40071	1.44238	0.029745	-0.0495576	0.570947	0.399733	[-0.20704818]
849	1.984	0.4	-30	-14	0	0	1.41814	1.3655	-0.0526416	0.571137	0.589348	3.18844	0.425914	6.47854	2.80143	2.89075	0.0318844	1.40071	1.44538	0.0318844	-0.0532323	0.570933	0.399714	[-0.20936264]
850	1.984	0.4	-30	-13	0	0	1.41814	1.36183	-0.0563154	0.571137	0.590578	3.40385	0.427694	6.92357	2.80143	2.89678	0.0340385	1.40071	1.44839	0.0340385	-0.0569474	0.570919	0.399695	[-0.21161332]
851	1.984	0.4	-30	-12	0	0	1.41814	1.35811	-0.060028	0.571137	0.591816	3.62066	0.42949	7.3724	2.80143	2.90286	0.0362066	1.40071	1.45143	0.0362066	-0.0607015	0.570905	0.399675	[-0.21379955]
852	1.984	0.4	-30	-11	0	0	1.41814	1.35436	-0.0637781	0.571137	0.593062	3.83877	0.4313	7.8249	2.80143	2.90897	0.0383877	1.40071	1.45448	0.0383877	-0.0644937	0.570891	0.399655	[-0.21592065]
853	1.984	0.4	-30	-10	0	0	1.41814	1.35058	-0.0675646	0.571137	0.594315	4.05811	0.433124	8.2809	2.80143	2.91511	0.0405811	1.40071	1.45756	0.0405811	-0.0683228	0.570877	0.399636	[-0.21797598]
854	1.984	0.4	-30	-9	0	0	1.41814	1.34675	-0.0713865	0.571137	0.595574	4.27859	0.434961	8.74025	2.80143	2.92129	0.0427859	1.40071	1.46064	0.0427859	-0.0721875	0.570863	0.399616	[-0.21996491]
855	1.984	0.4	-30	-8	0	0	1.41814	1.3429	-0.0752425	0.571137	0.596839	4.50014	0.436811	9.2028	2.80143	2.9275	0.0450014	1.40071	1.46375	0.0450014	-0.0760868	0.570849	0.399596	[-0.22188684]
856	1.984	0.4	-30	-7	0	0	1.41814	1.33901	-0.0791314	0.571137	0.59811	4.72268	0.438674	9.66839	2.80143	2.93373	0.0472268	1.40071	1.46687	0.0472268	-0.0800193	0.570835	0.399576	[-0.22374118]
857	1.984	0.4	-30	-6	0	0	1.41814	1.33509	-0.0830521	0.571137	0.599386	4.94612	0.440547	10.1369	2.80143	2.93999	0.0494612	1.40071	1.47	0.0494612	-0.083984	0.57082	0.399556	[-0.22552737]
858	1.984	0.4	-30	-5	0	0	1.41814	1.33114	-0.0870034	0.571137	0.600667	5.17038	0.442432	10.6081	2.80143	2.94627	0.0517038	1.40071	1.47314	0.0517038	-0.0879797	0.570806	0.399536	[-0.22724486]
859	1.984	0.4	-30	-4	0	0	1.41814	1.32716	-0.0909841	0.571137	0.601952	5.3954	0.444328	11.0819	2.80143	2.95258	0.053954	1.40071	1.47629	0.053954	-0.092005	0.570791	0.399516	[-0.22889312]
860	1.984	0.4	-30	-3	0	0	1.41814	1.32315	-0.0949929	0.571137	0.603241	5.62109	0.446233	11.5581	2.80143	2.9589	0.0562109	1.40071	1.47945	0.0562109	-0.0960588	0.570777	0.399496	[-0.23047167]
861	1.984	0.4	-30	-2	0	0	1.41814	1.31911	-0.0990286	0.571137	0.604534	5.84737	0.448147	12.0367	2.80143	2.96524	0.0584737	1.40071	1.48262	0.0584737	-0.10014	0.570763	0.399475	[-0.23198001]
862	1.984	0.4	-30	-1	0	0	1.41814	1.31505	-0.10309	0.571137	0.605829	6.07417	0.450069	12.5173	2.80143	2.97159	0.0607417	1.40071	1.4858	0.0607417	-0.104247	0.570748	0.399455	[-0.23341768]
863	1.984	0.4	-30	0	0	0	1.41814	1.31096	-0.107176	0.571137	0.607127	6.30142	0.452	12.9999	2.80143	2.97796	0.0630142	1.40071	1.48898	0.0630142	-0.108379	0.570733	0.399435	[-0.23478426]
864	1.435	0.1	-20	-20	0	0	1.00296	1.00296	0	0.285569	0.285569	0	0.1	-1.38778e-14	1.40071	1.40071	0	0.700357	0.700357	0	0	0.285569	0.1	[-0.14071145]
865	1.435	0.1	-20	-19	0	0	1.00296	1.00048	-0.00247249	0.285569	0.287323	0.614349	0.101232	1.23247	1.40071	1.40932	0.00614349	0.700357	0.70466	0.00614349	-0.00250024	0.285549	0.0999862	[-0.14260818]
866	1.435	0.1	-20	-18	0	0	1.00296	0.997979	-0.00497771	0.285569	0.289079	1.22932	0.102474	2.47374	1.40071	1.41793	0.0122932	0.700357	0.708967	0.0122932	-0.00503357	0.285529	0.0999724	[-0.14446147]
867	1.435	0.1	-20	-17	0	0	1.00296	0.995442	-0.00751489	0.285569	0.290836	1.84469	0.103723	3.72342	1.40071	1.42655	0.0184469	0.700357	0.713276	0.0184469	-0.00759922	0.28551	0.0999586	[-0.14627075]
868	1.435	0.1	-20	-16	0	0	1.00296	0.992874	-0.0100833	0.285569	0.292594	2.46029	0.104981	4.9811	1.40071	1.43518	0.0246029	0.700357	0.717588	0.0246029	-0.0101964	0.28549	0.0999448	[-0.14803548]
869	1.435	0.1	-20	-15	0	0	1.00296	0.990275	-0.012682	0.285569	0.294352	3.0759	0.106246	6.24641	1.40071	1.4438	0.030759	0.700357	0.721899	0.030759	-0.0128243	0.28547	0.099931	[-0.14975511]
870	1.435	0.1	-20	-14	0	0	1.00296	0.987647	-0.0153104	0.285569	0.29611	3.69135	0.107519	7.51896	1.40071	1.45242	0.0369135	0.700357	0.72621	0.0369135	-0.0154822	0.28545	0.0999172	[-0.15142913]
871	1.435	0.1	-20	-13	0	0	1.00296	0.98499	-0.0179676	0.285569	0.297867	4.30646	0.108798	8.79837	1.40071	1.46104	0.0430646	0.700357	0.730518	0.0430646	-0.0181693	0.285431	0.0999034	[-0.15305702]
872	1.435	0.1	-20	-12	0	0	1.00296	0.982304	-0.0206529	0.285569	0.299622	4.92105	0.110084	10.0843	1.40071	1.46964	0.0492105	0.700357	0.734822	0.0492105	-0.0208846	0.285411	0.0998896	[-0.15463828]
873	1.435	0.1	-20	-11	0	0	1.00296	0.979592	-0.0233653	0.285569	0.301375	5.53496	0.111376	11.3763	1.40071	1.47824	0.0553496	0.700357	0.739122	0.0553496	-0.0236275	0.285391	0.0998758	[-0.15617245]
874	1.435	0.1	-20	-10	0	0	1.00296	0.976853	-0.026104	0.285569	0.303125	6.14803	0.112674	12.674	1.40071	1.48683	0.0614803	0.700357	0.743415	0.0614803	-0.0263969	0.285372	0.0998621	[-0.15765904]
875	1.435	0.1	-20	-9	0	0	1.00296	0.974089	-0.0288683	0.285569	0.304873	6.76009	0.113977	13.9772	1.40071	1.4954	0.0676009	0.700357	0.747702	0.0676009	-0.0291923	0.285352	0.0998483	[-0.15909761]
876	1.435	0.1	-20	-8	0	0	1.00296	0.9713	-0.0316573	0.285569	0.306618	7.37101	0.115285	15.2853	1.40071	1.50396	0.0737101	0.700357	0.75198	0.0737101	-0.0320125	0.285332	0.0998346	[-0.16048771]
877	1.435	0.1	-20	-7	0	0	1.00296	0.968487	-0.0344701	0.285569	0.308359	7.98063	0.116598	16.5982	1.40071	1.5125	0.0798063	0.700357	0.75625	0.0798063	-0.0348569	0.285313	0.099821	[-0.16182893]
878	1.435	0.1	-20	-6	0	0	1.00296	0.965651	-0.0373059	0.285569	0.310096	8.5888	0.117915	17.9153	1.40071	1.52102	0.085888	0.700357	0.760509	0.085888	-0.0377245	0.285293	0.0998073	[-0.16312085]
879	1.435	0.1	-20	-5	0	0	1.00296	0.962793	-0.0401638	0.285569	0.311828	9.1954	0.119236	19.2364	1.40071	1.52952	0.091954	0.700357	0.764758	0.091954	-0.0406145	0.285274	0.0997937	[-0.16436309]
880	1.435	0.1	-20	-4	0	0	1.00296	0.959914	-0.043043	0.285569	0.313555	9.80029	0.120561	20.561	1.40071	1.53799	0.0980029	0.700357	0.768994	0.0980029	-0.043526	0.285255	0.0997802	[-0.16555526]
881	1.435	0.1	-20	-3	0	0	1.00296	0.957015	-0.0459425	0.285569	0.315277	10.4033	0.121889	21.889	1.40071	1.54644	0.104033	0.700357	0.773218	0.104033	-0.046458	0.285235	0.0997667	[-0.166697]
882	1.435	0.1	-20	-2	0	0	1.00296	0.954096	-0.0488615	0.285569	0.316994	11.0044	0.12322	23.2198	1.40071	1.55485	0.110044	0.700357	0.777427	0.110044	-0.0494098	0.285216	0.0997532	[-0.16778796]
883	1.435	0.1	-20	-1	0	0	1.00296	0.951158	-0.0517991	0.285569	0.318704	11.6034	0.124553	24.5532	1.40071	1.56324	0.116034	0.700357	0.781622	0.116034	-0.0523803	0.285197	0.0997398	[-0.16882781]
884	1.435	0.1	-20	0	0	0	1.00296	0.948203	-0.0547544	0.285569	0.320408	12.2002	0.125889	25.8888	1.40071	1.5716	0.122002	0.700357	0.785802	0.122002	-0.0553688	0.285178	0.0997264	[-0.16981624]
885	1.435	0.2	-20	-20	0	0	1.00296	1.00296	0	0.403855	0.403855	0	0.2	0	1.98091	1.98091	0	0.990454	0.990454	0	0	0.403855	0.2	[-0.14071145]
886	1.435	0.2	-20	-19	0	0	1.00296	1.00048	-0.00247249	0.403855	0.405099	0.308112	0.201234	0.617174	1.98091	1.98701	0.00308112	0.990454	0.993506	0.00308112	-0.00250024	0.403841	0.199986	[-0.14260818]
887	1.435	0.2	-20	-18	0	0	1.00296	0.997979	-0.00497771	0.403855	0.406352	0.61839	0.202481	1.2406	1.98091	1.99316	0.0061839	0.990454	0.996579	0.0061839	-0.00503357	0.403827	0.199972	[-0.14446147]
888	1.435	0.2	-20	-17	0	0	1.00296	0.995442	-0.00751489	0.403855	0.407614	0.9307	0.20374	1.87006	1.98091	1.99935	0.009307	0.990454	0.999673	0.009307	-0.00759922	0.403813	0.199958	[-0.14627075]
889	1.435	0.2	-20	-16	0	0	1.00296	0.992874	-0.0100833	0.403855	0.408883	1.24491	0.205011	2.50532	1.98091	2.00557	0.0124491	0.990454	1.00278	0.0124491	-0.0101964	0.403799	0.199944	[-0.14803548]
890	1.435	0.2	-20	-15	0	0	1.00296	0.990275	-0.012682	0.403855	0.410159	1.56089	0.206292	3.14615	1.98091	2.01183	0.0156089	0.990454	1.00591	0.0156089	-0.0128243	0.403784	0.19993	[-0.14975511]
891	1.435	0.2	-20	-14	0	0	1.00296	0.987647	-0.0153104	0.403855	0.411442	1.87852	0.207585	3.79232	1.98091	2.01812	0.0187852	0.990454	1.00906	0.0187852	-0.0154822	0.40377	0.199916	[-0.15142913]
892	1.435	0.2	-20	-13	0	0	1.00296	0.98499	-0.0179676	0.403855	0.41273	2.19766	0.208887	4.44362	1.98091	2.02444	0.0219766	0.990454	1.01222	0.0219766	-0.0181693	0.403755	0.199901	[-0.15305702]
893	1.435	0.2	-20	-12	0	0	1.00296	0.982304	-0.0206529	0.403855	0.414025	2.5182	0.2102	5.0998	1.98091	2.03079	0.025182	0.990454	1.0154	0.025182	-0.0208846	0.403741	0.199887	[-0.15463828]
894	1.435	0.2	-20	-11	0	0	1.00296	0.979592	-0.0233653	0.403855	0.415325	2.84	0.211521	5.76066	1.98091	2.03717	0.0284	0.990454	1.01858	0.0284	-0.0236275	0.403726	0.199873	[-0.15617245]
895	1.435	0.2	-20	-10	0	0	1.00296	0.976853	-0.026104	0.403855	0.416629	3.16296	0.212852	6.42597	1.98091	2.04356	0.0316296	0.990454	1.02178	0.0316296	-0.0263969	0.403712	0.199858	[-0.15765904]
896	1.435	0.2	-20	-9	0	0	1.00296	0.974089	-0.0288683	0.403855	0.417937	3.48695	0.214191	7.09549	1.98091	2.04998	0.0348695	0.990454	1.02499	0.0348695	-0.0291923	0.403697	0.199844	[-0.15909761]
897	1.435	0.2	-20	-8	0	0	1.00296	0.9713	-0.0316573	0.403855	0.419249	3.81186	0.215538	7.76902	1.98091	2.05642	0.0381186	0.990454	1.02821	0.0381186	-0.0320125	0.403682	0.199829	[-0.16048771]
898	1.435	0.2	-20	-7	0	0	1.00296	0.968487	-0.0344701	0.403855	0.420565	4.13757	0.216893	8.44634	1.98091	2.06287	0.0413757	0.990454	1.03144	0.0413757	-0.0348569	0.403668	0.199814	[-0.16182893]
899	1.435	0.2	-20	-6	0	0	1.00296	0.965651	-0.0373059	0.403855	0.421883	4.46397	0.218254	9.12721	1.98091	2.06934	0.0446397	0.990454	1.03467	0.0446397	-0.0377245	0.403653	0.1998	[-0.16312085]
900	1.435	0.2	-20	-5	0	0	1.00296	0.962793	-0.0401638	0.403855	0.423203	4.79095	0.219623	9.81142	1.98091	2.07581	0.0479095	0.990454	1.03791	0.0479095	-0.0406145	0.403638	0.199785	[-0.16436309]
901	1.435	0.2	-20	-4	0	0	1.00296	0.959914	-0.043043	0.403855	0.424526	5.11839	0.220998	10.4988	1.98091	2.0823	0.0511839	0.990454	1.04115	0.0511839	-0.043526	0.403623	0.19977	[-0.16555526]
902	1.435	0.2	-20	-3	0	0	1.00296	0.957015	-0.0459425	0.403855	0.42585	5.4462	0.222378	11.189	1.98091	2.08879	0.054462	0.990454	1.0444	0.054462	-0.046458	0.403608	0.199756	[-0.166697]
903	1.435	0.2	-20	-2	0	0	1.00296	0.954096	-0.0488615	0.403855	0.427175	5.77427	0.223764	11.882	1.98091	2.09529	0.0577427	0.990454	1.04765	0.0577427	-0.0494098	0.403593	0.199741	[-0.16778796]
904	1.435	0.2	-20	-1	0	0	1.00296	0.951158	-0.0517991	0.403855	0.4285	6.10249	0.225155	12.5774	1.98091	2.10179	0.0610249	0.990454	1.0509	0.0610249	-0.0523803	0.403578	0.199726	[-0.16882781]
905	1.435	0.2	-20	0	0	0	1.00296	0.948203	-0.0547544	0.403855	0.429826	6.43076	0.22655	13.2751	1.98091	2.1083	0.0643076	0.990454	1.05415	0.0643076	-0.0553688	0.403564	0.199711	[-0.16981624]
906	1.435	0.3	-20	-20	0	0	1.00296	1.00296	0	0.494619	0.494619	1.1223e-14	0.3	1.85037e-14	2.42611	2.42611	0	1.21305	1.21305	0	0	0.494619	0.3	[-0.14071145]
907	1.435	0.3	-20	-19	0	0	1.00296	1.00048	-0.00247249	0.494619	0.495636	0.205618	0.301235	0.411659	2.42611	2.4311	0.00205618	1.21305	1.21555	0.00205618	-0.00250024	0.494608	0.299986	[-0.14260818]
908	1.435	0.3	-20	-18	0	0	1.00296	0.997979	-0.00497771	0.494619	0.496663	0.413103	0.302484	0.827912	2.42611	2.43613	0.00413103	1.21305	1.21807	0.00413103	-0.00503357	0.494596	0.299972	[-0.14446147]
909	1.435	0.3	-20	-17	0	0	1.00296	0.995442	-0.00751489	0.494619	0.497698	0.622368	0.303746	1.24861	2.42611	2.44121	0.00622368	1.21305	1.2206	0.00622368	-0.00759922	0.494585	0.299958	[-0.14627075]
910	1.435	0.3	-20	-16	0	0	1.00296	0.992874	-0.0100833	0.494619	0.498741	0.833328	0.305021	1.6736	2.42611	2.44633	0.00833328	1.21305	1.22316	0.00833328	-0.0101964	0.494573	0.299944	[-0.14803548]
911	1.435	0.3	-20	-15	0	0	1.00296	0.990275	-0.012682	0.494619	0.499793	1.0459	0.306308	2.10273	2.42611	2.45148	0.010459	1.21305	1.22574	0.010459	-0.0128243	0.494561	0.29993	[-0.14975511]
912	1.435	0.3	-20	-14	0	0	1.00296	0.987647	-0.0153104	0.494619	0.500852	1.25999	0.307608	2.53586	2.42611	2.45668	0.0125999	1.21305	1.22834	0.0125999	-0.0154822	0.494549	0.299915	[-0.15142913]
913	1.435	0.3	-20	-13	0	0	1.00296	0.98499	-0.0179676	0.494619	0.501918	1.47553	0.308919	2.97284	2.42611	2.46191	0.0147553	1.21305	1.23095	0.0147553	-0.0181693	0.494537	0.299901	[-0.15305702]
914	1.435	0.3	-20	-12	0	0	1.00296	0.982304	-0.0206529	0.494619	0.50299	1.69243	0.310241	3.4135	2.42611	2.46717	0.0169243	1.21305	1.23358	0.0169243	-0.0208846	0.494525	0.299886	[-0.15463828]
915	1.435	0.3	-20	-11	0	0	1.00296	0.979592	-0.0233653	0.494619	0.50407	1.9106	0.311573	3.85771	2.42611	2.47246	0.019106	1.21305	1.23623	0.019106	-0.0236275	0.494513	0.299871	[-0.15617245]
916	1.435	0.3	-20	-10	0	0	1.00296	0.976853	-0.026104	0.494619	0.505155	2.12997	0.312916	4.3053	2.42611	2.47778	0.0212997	1.21305	1.23889	0.0212997	-0.0263969	0.494501	0.299857	[-0.15765904]
917	1.435	0.3	-20	-9	0	0	1.00296	0.974089	-0.0288683	0.494619	0.506245	2.35045	0.314268	4.75614	2.42611	2.48313	0.0235045	1.21305	1.24157	0.0235045	-0.0291923	0.494489	0.299842	[-0.15909761]
918	1.435	0.3	-20	-8	0	0	1.00296	0.9713	-0.0316573	0.494619	0.507341	2.57196	0.31563	5.21007	2.42611	2.48851	0.0257196	1.21305	1.24425	0.0257196	-0.0320125	0.494477	0.299827	[-0.16048771]
919	1.435	0.3	-20	-7	0	0	1.00296	0.968487	-0.0344701	0.494619	0.508441	2.79442	0.317001	5.66693	2.42611	2.4939	0.0279442	1.21305	1.24695	0.0279442	-0.0348569	0.494464	0.299812	[-0.16182893]
920	1.435	0.3	-20	-6	0	0	1.00296	0.965651	-0.0373059	0.494619	0.509546	3.01776	0.31838	6.12658	2.42611	2.49932	0.0301776	1.21305	1.24966	0.0301776	-0.0377245	0.494452	0.299797	[-0.16312085]
921	1.435	0.3	-20	-5	0	0	1.00296	0.962793	-0.0401638	0.494619	0.510654	3.24189	0.319767	6.58887	2.42611	2.50476	0.0324189	1.21305	1.25238	0.0324189	-0.0406145	0.494439	0.299782	[-0.16436309]
922	1.435	0.3	-20	-4	0	0	1.00296	0.959914	-0.043043	0.494619	0.511766	3.46673	0.321161	7.05365	2.42611	2.51021	0.0346673	1.21305	1.25511	0.0346673	-0.043526	0.494427	0.299767	[-0.16555526]
923	1.435	0.3	-20	-3	0	0	1.00296	0.957015	-0.0459425	0.494619	0.512882	3.69222	0.322562	7.52076	2.42611	2.51569	0.0369222	1.21305	1.25784	0.0369222	-0.046458	0.494414	0.299751	[-0.166697]
924	1.435	0.3	-20	-2	0	0	1.00296	0.954096	-0.0488615	0.494619	0.514	3.91826	0.32397	7.99006	2.42611	2.52117	0.0391826	1.21305	1.26058	0.0391826	-0.0494098	0.494402	0.299736	[-0.16778796]
925	1.435	0.3	-20	-1	0	0	1.00296	0.951158	-0.0517991	0.494619	0.51512	4.1448	0.325384	8.46139	2.42611	2.52667	0.041448	1.21305	1.26333	0.041448	-0.0523803	0.494389	0.299721	[-0.16882781]
926	1.435	0.3	-20	0	0	0	1.00296	0.948203	-0.0547544	0.494619	0.516243	4.37175	0.326804	8.93461	2.42611	2.53217	0.0437175	1.21305	1.26609	0.0437175	-0.0553688	0.494377	0.299706	[-0.16981624]
927	1.435	0.4	-20	-20	0	0	1.00296	1.00296	0	0.571137	0.571137	0	0.4	-1.38778e-14	2.80143	2.80143	0	1.40071	1.40071	0	0	0.571137	0.4	[-0.14071145]
928	1.435	0.4	-20	-19	0	0	1.00296	1.00048	-0.00247249	0.571137	0.572018	0.154293	0.401235	0.308824	2.80143	2.80575	0.00154293	1.40071	1.40288	0.00154293	-0.00250024	0.571127	0.399986	[-0.14260818]
929	1.435	0.4	-20	-18	0	0	1.00296	0.997979	-0.00497771	0.571137	0.572909	0.310145	0.402485	0.621252	2.80143	2.81012	0.00310145	1.40071	1.40506	0.00310145	-0.00503357	0.571117	0.399972	[-0.14446147]
930	1.435	0.4	-20	-17	0	0	1.00296	0.995442	-0.00751489	0.571137	0.573807	0.467495	0.403749	0.937176	2.80143	2.81452	0.00467495	1.40071	1.40726	0.00467495	-0.00759922	0.571107	0.399958	[-0.14627075]
931	1.435	0.4	-20	-16	0	0	1.00296	0.992874	-0.0100833	0.571137	0.574714	0.626282	0.405026	1.25649	2.80143	2.81897	0.00626282	1.40071	1.40949	0.00626282	-0.0101964	0.571097	0.399944	[-0.14803548]
932	1.435	0.4	-20	-15	0	0	1.00296	0.990275	-0.012682	0.571137	0.575629	0.786443	0.406316	1.57907	2.80143	2.82346	0.00786443	1.40071	1.41173	0.00786443	-0.0128243	0.571087	0.399929	[-0.14975511]
933	1.435	0.4	-20	-14	0	0	1.00296	0.987647	-0.0153104	0.571137	0.576551	0.947917	0.407619	1.90482	2.80143	2.82798	0.00947917	1.40071	1.41399	0.00947917	-0.0154822	0.571076	0.399915	[-0.15142913]
934	1.435	0.4	-20	-13	0	0	1.00296	0.98499	-0.0179676	0.571137	0.577481	1.11064	0.408934	2.23362	2.80143	2.83254	0.0111064	1.40071	1.41627	0.0111064	-0.0181693	0.571066	0.3999	[-0.15305702]
935	1.435	0.4	-20	-12	0	0	1.00296	0.982304	-0.0206529	0.571137	0.578417	1.27456	0.410261	2.56536	2.80143	2.83713	0.0127456	1.40071	1.41857	0.0127456	-0.0208846	0.571056	0.399886	[-0.15463828]
936	1.435	0.4	-20	-11	0	0	1.00296	0.979592	-0.0233653	0.571137	0.579359	1.4396	0.4116	2.89993	2.80143	2.84176	0.014396	1.40071	1.42088	0.014396	-0.0236275	0.571045	0.399871	[-0.15617245]
937	1.435	0.4	-20	-10	0	0	1.00296	0.976853	-0.026104	0.571137	0.580308	1.60572	0.412949	3.23722	2.80143	2.84641	0.0160572	1.40071	1.42321	0.0160572	-0.0263969	0.571034	0.399856	[-0.15765904]
938	1.435	0.4	-20	-9	0	0	1.00296	0.974089	-0.0288683	0.571137	0.581263	1.77284	0.414308	3.57711	2.80143	2.85109	0.0177284	1.40071	1.42555	0.0177284	-0.0291923	0.571024	0.399841	[-0.15909761]
939	1.435	0.4	-20	-8	0	0	1.00296	0.9713	-0.0316573	0.571137	0.582223	1.94091	0.415678	3.91949	2.80143	2.8558	0.0194091	1.40071	1.4279	0.0194091	-0.0320125	0.571013	0.399826	[-0.16048771]
940	1.435	0.4	-20	-7	0	0	1.00296	0.968487	-0.0344701	0.571137	0.583187	2.10987	0.417057	4.26425	2.80143	2.86053	0.0210987	1.40071	1.43027	0.0210987	-0.0348569	0.571002	0.399811	[-0.16182893]
941	1.435	0.4	-20	-6	0	0	1.00296	0.965651	-0.0373059	0.571137	0.584157	2.27965	0.418445	4.61127	2.80143	2.86529	0.0227965	1.40071	1.43265	0.0227965	-0.0377245	0.570991	0.399795	[-0.16312085]
942	1.435	0.4	-20	-5	0	0	1.00296	0.962793	-0.0401638	0.571137	0.585131	2.4502	0.419842	4.96044	2.80143	2.87007	0.024502	1.40071	1.43503	0.024502	-0.0406145	0.57098	0.39978	[-0.16436309]
943	1.435	0.4	-20	-4	0	0	1.00296	0.959914	-0.043043	0.571137	0.586109	2.62147	0.421247	5.31165	2.80143	2.87487	0.0262147	1.40071	1.43743	0.0262147	-0.043526	0.570969	0.399765	[-0.16555526]
944	1.435	0.4	-20	-3	0	0	1.00296	0.957015	-0.0459425	0.571137	0.587091	2.79338	0.422659	5.66478	2.80143	2.87968	0.0279338	1.40071	1.43984	0.0279338	-0.046458	0.570958	0.399749	[-0.166697]
945	1.435	0.4	-20	-2	0	0	1.00296	0.954096	-0.0488615	0.571137	0.588076	2.96588	0.424079	6.01972	2.80143	2.88452	0.0296588	1.40071	1.44226	0.0296588	-0.0494098	0.570947	0.399734	[-0.16778796]
946	1.435	0.4	-20	-1	0	0	1.00296	0.951158	-0.0517991	0.571137	0.589065	3.13892	0.425505	6.37636	2.80143	2.88936	0.0313892	1.40071	1.44468	0.0313892	-0.0523803	0.570936	0.399718	[-0.16882781]
947	1.435	0.4	-20	0	0	0	1.00296	0.948203	-0.0547544	0.571137	0.590056	3.31243	0.426938	6.73458	2.80143	2.89422	0.0331243	1.40071	1.44711	0.0331243	-0.0553688	0.570925	0.399703	[-0.16981624]
948	1.7095	0.1	-20	-20	0	0	1.19481	1.19481	0	0.285569	0.285569	0	0.1	-1.38778e-14	1.40071	1.40071	0	0.700357	0.700357	0	0	0.285569	0.1	[-0.16762803]
949	1.7095	0.1	-20	-19	0	0	1.19481	1.19187	-0.00294545	0.285569	0.287656	0.73102	0.101467	1.46738	1.40071	1.41095	0.0073102	0.700357	0.705477	0.0073102	-0.00297851	0.285545	0.0999836	[-0.16988758]
950	1.7095	0.1	-20	-18	0	0	1.19481	1.18888	-0.00592989	0.285569	0.289741	1.46112	0.102944	2.9436	1.40071	1.42118	0.0146112	0.700357	0.71059	0.0146112	-0.00599643	0.285522	0.0999672	[-0.17209538]
951	1.7095	0.1	-20	-17	0	0	1.19481	1.18586	-0.00895241	0.285569	0.291823	2.19014	0.104428	4.42824	1.40071	1.43139	0.0219014	0.700357	0.715696	0.0219014	-0.00905287	0.285498	0.0999509	[-0.17425076]
952	1.7095	0.1	-20	-16	0	0	1.19481	1.1828	-0.0120121	0.285569	0.293901	2.91788	0.105921	5.9209	1.40071	1.44159	0.0291788	0.700357	0.720793	0.0291788	-0.0121469	0.285475	0.0999345	[-0.17635306]
953	1.7095	0.1	-20	-15	0	0	1.19481	1.1797	-0.015108	0.285569	0.295975	3.64419	0.107421	7.42119	1.40071	1.45176	0.0364419	0.700357	0.725879	0.0364419	-0.0152775	0.285452	0.0999182	[-0.17840164]
954	1.7095	0.1	-20	-14	0	0	1.19481	1.17657	-0.0182392	0.285569	0.298045	4.36892	0.108929	8.92871	1.40071	1.46191	0.0436892	0.700357	0.730955	0.0436892	-0.0184438	0.285429	0.099902	[-0.18039588]
955	1.7095	0.1	-20	-13	0	0	1.19481	1.17341	-0.0214047	0.285569	0.300109	5.09189	0.110443	10.4431	1.40071	1.47204	0.0509189	0.700357	0.736018	0.0509189	-0.0216448	0.285405	0.0998858	[-0.18233517]
956	1.7095	0.1	-20	-12	0	0	1.19481	1.17021	-0.0246035	0.285569	0.302169	5.81298	0.111964	11.9639	1.40071	1.48214	0.0581298	0.700357	0.741069	0.0581298	-0.0248796	0.285382	0.0998696	[-0.18421892]
957	1.7095	0.1	-20	-11	0	0	1.19481	1.16698	-0.0278348	0.285569	0.304222	6.53202	0.113491	13.4907	1.40071	1.49221	0.0653202	0.700357	0.746105	0.0653202	-0.0281471	0.285359	0.0998535	[-0.18604655]
958	1.7095	0.1	-20	-10	0	0	1.19481	1.16371	-0.0310975	0.285569	0.306269	7.2489	0.115023	15.0233	1.40071	1.50225	0.072489	0.700357	0.751125	0.072489	-0.0314464	0.285336	0.0998374	[-0.18781751]
959	1.7095	0.1	-20	-9	0	0	1.19481	1.16042	-0.0343905	0.285569	0.30831	7.96346	0.116561	16.5611	1.40071	1.51226	0.0796346	0.700357	0.75613	0.0796346	-0.0347764	0.285313	0.0998214	[-0.18953126]
960	1.7095	0.1	-20	-8	0	0	1.19481	1.1571	-0.037713	0.285569	0.310343	8.67559	0.118104	18.1038	1.40071	1.52223	0.0867559	0.700357	0.761117	0.0867559	-0.0381362	0.285291	0.0998054	[-0.19118728]
961	1.7095	0.1	-20	-7	0	0	1.19481	1.15375	-0.0410639	0.285569	0.31237	9.38516	0.119651	19.6511	1.40071	1.53217	0.0938516	0.700357	0.766087	0.0938516	-0.0415247	0.285268	0.0997895	[-0.19278506]
962	1.7095	0.1	-20	-6	0	0	1.19481	1.15037	-0.0444421	0.285569	0.314388	10.092	0.121203	21.2026	1.40071	1.54207	0.10092	0.700357	0.771037	0.10092	-0.0449408	0.285245	0.0997736	[-0.19432411]
963	1.7095	0.1	-20	-5	0	0	1.19481	1.14697	-0.0478467	0.285569	0.316399	10.7961	0.122758	22.7578	1.40071	1.55194	0.107961	0.700357	0.775968	0.107961	-0.0483836	0.285223	0.0997579	[-0.19580397]
964	1.7095	0.1	-20	-4	0	0	1.19481	1.14354	-0.0512766	0.285569	0.318401	11.4973	0.124316	24.3164	1.40071	1.56176	0.114973	0.700357	0.780879	0.114973	-0.051852	0.2852	0.0997421	[-0.19722419]
965	1.7095	0.1	-20	-3	0	0	1.19481	1.14008	-0.0547308	0.285569	0.320395	12.1954	0.125878	25.8781	1.40071	1.57154	0.121954	0.700357	0.785769	0.121954	-0.0553449	0.285178	0.0997265	[-0.19858433]
966	1.7095	0.1	-20	-2	0	0	1.19481	1.1366	-0.0582082	0.285569	0.32238	12.8904	0.127442	27.4425	1.40071	1.58127	0.128904	0.700357	0.790636	0.128904	-0.0588613	0.285156	0.0997109	[-0.19988398]
967	1.7095	0.1	-20	-1	0	0	1.19481	1.1331	-0.0617077	0.285569	0.324355	13.5822	0.129009	29.0091	1.40071	1.59096	0.135822	0.700357	0.795481	0.135822	-0.0624001	0.285133	0.0996954	[-0.20112275]
968	1.7095	0.1	-20	0	0	0	1.19481	1.12958	-0.0652283	0.285569	0.326321	14.2706	0.130578	30.5777	1.40071	1.6006	0.142706	0.700357	0.800302	0.142706	-0.0659603	0.285111	0.09968	[-0.20230025]
969	1.7095	0.2	-20	-20	0	0	1.19481	1.19481	0	0.403855	0.403855	0	0.2	0	1.98091	1.98091	0	0.990454	0.990454	0	0	0.403855	0.2	[-0.16762803]
970	1.7095	0.2	-20	-19	0	0	1.19481	1.19187	-0.00294545	0.403855	0.405337	0.366836	0.20147	0.735018	1.98091	1.98818	0.00366836	0.990454	0.994088	0.00366836	-0.00297851	0.403838	0.199984	[-0.16988758]
971	1.7095	0.2	-20	-18	0	0	1.19481	1.18888	-0.00592989	0.403855	0.406827	0.735822	0.202954	1.47706	1.98091	1.99548	0.00735822	0.990454	0.997742	0.00735822	-0.00599643	0.403822	0.199967	[-0.17209538]
972	1.7095	0.2	-20	-17	0	0	1.19481	1.18586	-0.00895241	0.403855	0.408325	1.1068	0.204452	2.22585	1.98091	2.00283	0.011068	0.990454	1.00142	0.011068	-0.00905287	0.403805	0.19995	[-0.17425076]
973	1.7095	0.2	-20	-16	0	0	1.19481	1.1828	-0.0120121	0.403855	0.409831	1.47962	0.205962	2.98113	1.98091	2.01022	0.0147962	0.990454	1.00511	0.0147962	-0.0121469	0.403788	0.199934	[-0.17635306]
974	1.7095	0.2	-20	-15	0	0	1.19481	1.1797	-0.015108	0.403855	0.411343	1.85412	0.207485	3.74262	1.98091	2.01764	0.0185412	0.990454	1.00882	0.0185412	-0.0152775	0.403771	0.199917	[-0.17840164]
975	1.7095	0.2	-20	-14	0	0	1.19481	1.17657	-0.0182392	0.403855	0.412862	2.23016	0.20902	4.51005	1.98091	2.02509	0.0223016	0.990454	1.01254	0.0223016	-0.0184438	0.403754	0.1999	[-0.18039588]
976	1.7095	0.2	-20	-13	0	0	1.19481	1.17341	-0.0214047	0.403855	0.414386	2.60759	0.210566	5.28317	1.98091	2.03256	0.0260759	0.990454	1.01628	0.0260759	-0.0216448	0.403737	0.199883	[-0.18233517]
977	1.7095	0.2	-20	-12	0	0	1.19481	1.17021	-0.0246035	0.403855	0.415915	2.98626	0.212123	6.06171	1.98091	2.04006	0.0298626	0.990454	1.02003	0.0298626	-0.0248796	0.40372	0.199866	[-0.18421892]
978	1.7095	0.2	-20	-11	0	0	1.19481	1.16698	-0.0278348	0.403855	0.417449	3.36605	0.213691	6.8454	1.98091	2.04759	0.0336605	0.990454	1.02379	0.0336605	-0.0281471	0.403702	0.199849	[-0.18604655]
979	1.7095	0.2	-20	-10	0	0	1.19481	1.16371	-0.0310975	0.403855	0.418987	3.7468	0.215268	7.63398	1.98091	2.05513	0.037468	0.990454	1.02756	0.037468	-0.0314464	0.403685	0.199832	[-0.18781751]
980	1.7095	0.2	-20	-9	0	0	1.19481	1.16042	-0.0343905	0.403855	0.420528	4.12838	0.216854	8.4272	1.98091	2.06269	0.0412838	0.990454	1.03134	0.0412838	-0.0347764	0.403668	0.199815	[-0.18953126]
981	1.7095	0.2	-20	-8	0	0	1.19481	1.1571	-0.037713	0.403855	0.422072	4.51067	0.21845	9.22479	1.98091	2.07026	0.0451067	0.990454	1.03513	0.0451067	-0.0381362	0.403651	0.199798	[-0.19118728]
982	1.7095	0.2	-20	-7	0	0	1.19481	1.15375	-0.0410639	0.403855	0.423618	4.89352	0.220053	10.0265	1.98091	2.07785	0.0489352	0.990454	1.03892	0.0489352	-0.0415247	0.403633	0.19978	[-0.19278506]
983	1.7095	0.2	-20	-6	0	0	1.19481	1.15037	-0.0444421	0.403855	0.425166	5.27682	0.221664	10.8321	1.98091	2.08544	0.0527682	0.990454	1.04272	0.0527682	-0.0449408	0.403616	0.199763	[-0.19432411]
984	1.7095	0.2	-20	-5	0	0	1.19481	1.14697	-0.0478467	0.403855	0.426715	5.66044	0.223283	11.6413	1.98091	2.09304	0.0566044	0.990454	1.04652	0.0566044	-0.0483836	0.403599	0.199746	[-0.19580397]
985	1.7095	0.2	-20	-4	0	0	1.19481	1.14354	-0.0512766	0.403855	0.428265	6.04425	0.224908	12.4538	1.98091	2.10064	0.0604425	0.990454	1.05032	0.0604425	-0.051852	0.403581	0.199729	[-0.19722419]
986	1.7095	0.2	-20	-3	0	0	1.19481	1.14008	-0.0547308	0.403855	0.429815	6.42814	0.226539	13.2695	1.98091	2.10824	0.0642814	0.990454	1.05412	0.0642814	-0.0553449	0.403564	0.199712	[-0.19858433]
987	1.7095	0.2	-20	-2	0	0	1.19481	1.1366	-0.0582082	0.403855	0.431366	6.81199	0.228176	14.088	1.98091	2.11585	0.0681199	0.990454	1.05792	0.0681199	-0.0588613	0.403546	0.199694	[-0.19988398]
988	1.7095	0.2	-20	-1	0	0	1.19481	1.1331	-0.0617077	0.403855	0.432915	7.19569	0.229818	14.9092	1.98091	2.12345	0.0719569	0.990454	1.06172	0.0719569	-0.0624001	0.403529	0.199677	[-0.20112275]
989	1.7095	0.2	-20	0	0	0	1.19481	1.12958	-0.0652283	0.403855	0.434464	7.57911	0.231465	15.7327	1.98091	2.13104	0.0757911	0.990454	1.06552	0.0757911	-0.0659603	0.403512	0.19966	[-0.20230025]
990	1.7095	0.3	-20	-20	0	0	1.19481	1.19481	0	0.494619	0.494619	1.1223e-14	0.3	1.85037e-14	2.42611	2.42611	0	1.21305	1.21305	0	0	0.494619	0.3	[-0.16762803]
991	1.7095	0.3	-20	-19	0	0	1.19481	1.19187	-0.00294545	0.494619	0.49583	0.244855	0.301471	0.490309	2.42611	2.43205	0.00244855	1.21305	1.21602	0.00244855	-0.00297851	0.494606	0.299984	[-0.16988758]
992	1.7095	0.3	-20	-18	0	0	1.19481	1.18888	-0.00592989	0.494619	0.497052	0.49174	0.302958	0.985898	2.42611	2.43804	0.0049174	1.21305	1.21902	0.0049174	-0.00599643	0.494592	0.299967	[-0.17209538]
993	1.7095	0.3	-20	-17	0	0	1.19481	1.18586	-0.00895241	0.494619	0.498282	0.74055	0.30446	1.48658	2.42611	2.44407	0.0074055	1.21305	1.22204	0.0074055	-0.00905287	0.494578	0.29995	[-0.17425076]
994	1.7095	0.3	-20	-16	0	0	1.19481	1.1828	-0.0120121	0.494619	0.499522	0.991183	0.305977	1.99219	2.42611	2.45016	0.00991183	1.21305	1.22508	0.00991183	-0.0121469	0.494564	0.299933	[-0.17635306]
995	1.7095	0.3	-20	-15	0	0	1.19481	1.1797	-0.015108	0.494619	0.50077	1.24353	0.307508	2.50253	2.42611	2.45628	0.0124353	1.21305	1.22814	0.0124353	-0.0152775	0.49455	0.299916	[-0.17840164]
996	1.7095	0.3	-20	-14	0	0	1.19481	1.17657	-0.0182392	0.494619	0.502026	1.4975	0.309052	3.01743	2.42611	2.46244	0.014975	1.21305	1.23122	0.014975	-0.0184438	0.494536	0.299899	[-0.18039588]
997	1.7095	0.3	-20	-13	0	0	1.19481	1.17341	-0.0214047	0.494619	0.50329	1.75299	0.31061	3.53671	2.42611	2.46864	0.0175299	1.21305	1.23432	0.0175299	-0.0216448	0.494522	0.299882	[-0.18233517]
998	1.7095	0.3	-20	-12	0	0	1.19481	1.17021	-0.0246035	0.494619	0.504561	2.0099	0.312181	4.06019	2.42611	2.47487	0.020099	1.21305	1.23744	0.020099	-0.0248796	0.494508	0.299865	[-0.18421892]
999	1.7095	0.3	-20	-11	0	0	1.19481	1.16698	-0.0278348	0.494619	0.505838	2.26812	0.313763	4.58769	2.42611	2.48114	0.0226812	1.21305	1.24057	0.0226812	-0.0281471	0.494493	0.299847	[-0.18604655]
1000	1.7095	0.3	-20	-10	0	0	1.19481	1.16371	-0.0310975	0.494619	0.507121	2.52757	0.315357	5.11902	2.42611	2.48743	0.0252757	1.21305	1.24371	0.0252757	-0.0314464	0.494479	0.29983	[-0.18781751]
1001	1.7095	0.3	-20	-9	0	0	1.19481	1.16042	-0.0343905	0.494619	0.50841	2.78814	0.316962	5.65402	2.42611	2.49375	0.0278814	1.21305	1.24688	0.0278814	-0.0347764	0.494465	0.299812	[-0.18953126]
1002	1.7095	0.3	-20	-8	0	0	1.19481	1.1571	-0.037713	0.494619	0.509704	3.04974	0.318577	6.19249	2.42611	2.5001	0.0304974	1.21305	1.25005	0.0304974	-0.0381362	0.49445	0.299795	[-0.19118728]
1003	1.7095	0.3	-20	-7	0	0	1.19481	1.15375	-0.0410639	0.494619	0.511003	3.31228	0.320203	6.73427	2.42611	2.50647	0.0331228	1.21305	1.25323	0.0331228	-0.0415247	0.494436	0.299777	[-0.19278506]
1004	1.7095	0.3	-20	-6	0	0	1.19481	1.15037	-0.0444421	0.494619	0.512305	3.57566	0.321838	7.27917	2.42611	2.51286	0.0357566	1.21305	1.25643	0.0357566	-0.0449408	0.494421	0.299759	[-0.19432411]
1005	1.7095	0.3	-20	-5	0	0	1.19481	1.14697	-0.0478467	0.494619	0.513612	3.83979	0.323481	7.82702	2.42611	2.51927	0.0383979	1.21305	1.25963	0.0383979	-0.0483836	0.494406	0.299742	[-0.19580397]
1006	1.7095	0.3	-20	-4	0	0	1.19481	1.14354	-0.0512766	0.494619	0.514921	4.10458	0.325133	8.37763	2.42611	2.52569	0.0410458	1.21305	1.26284	0.0410458	-0.051852	0.494392	0.299724	[-0.19722419]
1007	1.7095	0.3	-20	-3	0	0	1.19481	1.14008	-0.0547308	0.494619	0.516234	4.36994	0.326793	8.93084	2.42611	2.53213	0.0436994	1.21305	1.26606	0.0436994	-0.0553449	0.494377	0.299706	[-0.19858433]
1008	1.7095	0.3	-20	-2	0	0	1.19481	1.1366	-0.0582082	0.494619	0.517549	4.63578	0.328459	9.48646	2.42611	2.53858	0.0463578	1.21305	1.26929	0.0463578	-0.0588613	0.494362	0.299688	[-0.19988398]
1009	1.7095	0.3	-20	-1	0	0	1.19481	1.1331	-0.0617077	0.494619	0.518866	4.90201	0.330133	10.0443	2.42611	2.54504	0.0490201	1.21305	1.27252	0.0490201	-0.0624001	0.494347	0.29967	[-0.20112275]
1010	1.7095	0.3	-20	0	0	0	1.19481	1.12958	-0.0652283	0.494619	0.520184	5.16856	0.331813	10.6042	2.42611	2.5515	0.0516856	1.21305	1.27575	0.0516856	-0.0659603	0.494333	0.299652	[-0.20230025]
1011	1.7095	0.4	-20	-20	0	0	1.19481	1.19481	0	0.571137	0.571137	0	0.4	-1.38778e-14	2.80143	2.80143	0	1.40071	1.40071	0	0	0.571137	0.4	[-0.16762803]
1012	1.7095	0.4	-20	-19	0	0	1.19481	1.19187	-0.00294545	0.571137	0.572187	0.183753	0.401471	0.367844	2.80143	2.80658	0.00183753	1.40071	1.40329	0.00183753	-0.00297851	0.571125	0.399984	[-0.16988758]
1013	1.7095	0.4	-20	-18	0	0	1.19481	1.18888	-0.00592989	0.571137	0.573246	0.369255	0.402959	0.739873	2.80143	2.81177	0.00369255	1.40071	1.40589	0.00369255	-0.00599643	0.571114	0.399967	[-0.17209538]
1014	1.7095	0.4	-20	-17	0	0	1.19481	1.18586	-0.00895241	0.571137	0.574315	0.55643	0.404464	1.11596	2.80143	2.81702	0.0055643	1.40071	1.40851	0.0055643	-0.00905287	0.571102	0.39995	[-0.17425076]
1015	1.7095	0.4	-20	-16	0	0	1.19481	1.1828	-0.0120121	0.571137	0.575393	0.745202	0.405984	1.49596	2.80143	2.8223	0.00745202	1.40071	1.41115	0.00745202	-0.0121469	0.571089	0.399933	[-0.17635306]
1016	1.7095	0.4	-20	-15	0	0	1.19481	1.1797	-0.015108	0.571137	0.57648	0.935497	0.407519	1.87975	2.80143	2.82764	0.00935497	1.40071	1.41382	0.00935497	-0.0152775	0.571077	0.399916	[-0.17840164]
1017	1.7095	0.4	-20	-14	0	0	1.19481	1.17657	-0.0182392	0.571137	0.577575	1.12724	0.409069	2.26719	2.80143	2.83301	0.0112724	1.40071	1.4165	0.0112724	-0.0184438	0.571065	0.399899	[-0.18039588]
1018	1.7095	0.4	-20	-13	0	0	1.19481	1.17341	-0.0214047	0.571137	0.578678	1.32036	0.410633	2.65815	2.80143	2.83842	0.0132036	1.40071	1.41921	0.0132036	-0.0216448	0.571053	0.399881	[-0.18233517]
1019	1.7095	0.4	-20	-12	0	0	1.19481	1.17021	-0.0246035	0.571137	0.579789	1.51478	0.41221	3.0525	2.80143	2.84386	0.0151478	1.40071	1.42193	0.0151478	-0.0248796	0.57104	0.399864	[-0.18421892]
1020	1.7095	0.4	-20	-11	0	0	1.19481	1.16698	-0.0278348	0.571137	0.580906	1.71042	0.4138	3.45009	2.80143	2.84934	0.0171042	1.40071	1.42467	0.0171042	-0.0281471	0.571028	0.399846	[-0.18604655]
1021	1.7095	0.4	-20	-10	0	0	1.19481	1.16371	-0.0310975	0.571137	0.58203	1.90722	0.415403	3.85081	2.80143	2.85486	0.0190722	1.40071	1.42743	0.0190722	-0.0314464	0.571015	0.399829	[-0.18781751]
1022	1.7095	0.4	-20	-9	0	0	1.19481	1.16042	-0.0343905	0.571137	0.58316	2.10509	0.417018	4.2545	2.80143	2.8604	0.0210509	1.40071	1.4302	0.0210509	-0.0347764	0.571002	0.399811	[-0.18953126]
1023	1.7095	0.4	-20	-8	0	0	1.19481	1.1571	-0.037713	0.571137	0.584296	2.30398	0.418644	4.66104	2.80143	2.86597	0.0230398	1.40071	1.43299	0.0230398	-0.0381362	0.57099	0.399793	[-0.19118728]
1024	1.7095	0.4	-20	-7	0	0	1.19481	1.15375	-0.0410639	0.571137	0.585437	2.5038	0.420281	5.0703	2.80143	2.87157	0.025038	1.40071	1.43579	0.025038	-0.0415247	0.570977	0.399775	[-0.19278506]
1025	1.7095	0.4	-20	-6	0	0	1.19481	1.15037	-0.0444421	0.571137	0.586584	2.70449	0.421928	5.48212	2.80143	2.87719	0.0270449	1.40071	1.4386	0.0270449	-0.0449408	0.570964	0.399757	[-0.19432411]
1026	1.7095	0.4	-20	-5	0	0	1.19481	1.14697	-0.0478467	0.571137	0.587734	2.90597	0.423586	5.89639	2.80143	2.88284	0.0290597	1.40071	1.44142	0.0290597	-0.0483836	0.570951	0.399739	[-0.19580397]
1027	1.7095	0.4	-20	-4	0	0	1.19481	1.14354	-0.0512766	0.571137	0.588889	3.10818	0.425252	6.31297	2.80143	2.8885	0.0310818	1.40071	1.44425	0.0310818	-0.051852	0.570938	0.399721	[-0.19722419]
1028	1.7095	0.4	-20	-3	0	0	1.19481	1.14008	-0.0547308	0.571137	0.590048	3.31105	0.426927	6.73172	2.80143	2.89418	0.0331105	1.40071	1.44709	0.0331105	-0.0553449	0.570925	0.399703	[-0.19858433]
1029	1.7095	0.4	-20	-2	0	0	1.19481	1.1366	-0.0582082	0.571137	0.59121	3.51449	0.42861	7.15251	2.80143	2.89988	0.0351449	1.40071	1.44994	0.0351449	-0.0588613	0.570912	0.399685	[-0.19988398]
1030	1.7095	0.4	-20	-1	0	0	1.19481	1.1331	-0.0617077	0.571137	0.592375	3.71846	0.430301	7.5752	2.80143	2.9056	0.0371846	1.40071	1.4528	0.0371846	-0.0624001	0.570899	0.399666	[-0.20112275]
1031	1.7095	0.4	-20	0	0	0	1.19481	1.12958	-0.0652283	0.571137	0.593542	3.92288	0.431999	7.99965	2.80143	2.91132	0.0392288	1.40071	1.45566	0.0392288	-0.0659603	0.570886	0.399648	[-0.20230025]
1032	1.984	0.1	-20	-20	0	0	1.38667	1.38667	0	0.285569	0.285569	0	0.1	-1.38778e-14	1.40071	1.40071	0	0.700357	0.700357	0	0	0.285569	0.1	[-0.19454461]
1033	1.984	0.1	-20	-19	0	0	1.38667	1.38325	-0.00341842	0.285569	0.287989	0.847423	0.101702	1.70203	1.40071	1.41258	0.00847423	0.700357	0.706292	0.00847423	-0.00345677	0.285541	0.099981	[-0.19716699]
1034	1.984	0.1	-20	-18	0	0	1.38667	1.37978	-0.00688208	0.285569	0.2904	1.69189	0.103412	3.41241	1.40071	1.42441	0.0169189	0.700357	0.712206	0.0169189	-0.0069593	0.285514	0.099962	[-0.1997293]
1035	1.984	0.1	-20	-17	0	0	1.38667	1.37628	-0.0103899	0.285569	0.292803	2.53331	0.105131	5.13079	1.40071	1.4362	0.0253331	0.700357	0.718099	0.0253331	-0.0105065	0.285487	0.0999432	[-0.20223078]
1036	1.984	0.1	-20	-16	0	0	1.38667	1.37273	-0.0139409	0.285569	0.295197	3.37155	0.106857	6.85678	1.40071	1.44794	0.0337155	0.700357	0.72397	0.0337155	-0.0140973	0.285461	0.0999243	[-0.20467065]
1037	1.984	0.1	-20	-15	0	0	1.38667	1.36913	-0.0175339	0.285569	0.297581	4.20653	0.10859	8.59001	1.40071	1.45964	0.0420653	0.700357	0.729818	0.0420653	-0.0177307	0.285434	0.0999056	[-0.20704818]
1038	1.984	0.1	-20	-14	0	0	1.38667	1.3655	-0.0211679	0.285569	0.299956	5.03814	0.11033	10.3301	1.40071	1.47128	0.0503814	0.700357	0.735642	0.0503814	-0.0214054	0.285407	0.099887	[-0.20936264]
1039	1.984	0.1	-20	-13	0	0	1.38667	1.36183	-0.0248417	0.285569	0.302321	5.86629	0.112077	12.0767	1.40071	1.48288	0.0586629	0.700357	0.741442	0.0586629	-0.0251204	0.285381	0.0998684	[-0.21161332]
1040	1.984	0.1	-20	-12	0	0	1.38667	1.35811	-0.0285542	0.285569	0.304676	6.69087	0.113829	13.8294	1.40071	1.49443	0.0669087	0.700357	0.747217	0.0669087	-0.0288746	0.285354	0.0998499	[-0.21379955]
1041	1.984	0.1	-20	-11	0	0	1.38667	1.35436	-0.0323043	0.285569	0.30702	7.51181	0.115588	15.5879	1.40071	1.50593	0.0751181	0.700357	0.752967	0.0751181	-0.0326668	0.285328	0.0998315	[-0.21592065]
1042	1.984	0.1	-20	-10	0	0	1.38667	1.35058	-0.0360909	0.285569	0.309354	8.329	0.117352	17.3517	1.40071	1.51738	0.08329	0.700357	0.75869	0.08329	-0.0364959	0.285302	0.0998132	[-0.21797598]
1043	1.984	0.1	-20	-9	0	0	1.38667	1.34675	-0.0399127	0.285569	0.311676	9.14236	0.119121	19.1205	1.40071	1.52877	0.0914236	0.700357	0.764386	0.0914236	-0.0403606	0.285276	0.0997949	[-0.21996491]
1044	1.984	0.1	-20	-8	0	0	1.38667	1.3429	-0.0437687	0.285569	0.313988	9.9518	0.120894	20.894	1.40071	1.54011	0.099518	0.700357	0.770055	0.099518	-0.0442598	0.28525	0.0997768	[-0.22188684]
1045	1.984	0.1	-20	-7	0	0	1.38667	1.33901	-0.0476576	0.285569	0.316288	10.7572	0.122672	22.6716	1.40071	1.55139	0.107572	0.700357	0.775696	0.107572	-0.0481924	0.285224	0.0997587	[-0.22374118]
1046	1.984	0.1	-20	-6	0	0	1.38667	1.33509	-0.0515784	0.285569	0.318576	11.5586	0.124453	24.4532	1.40071	1.56262	0.115586	0.700357	0.781308	0.115586	-0.0521571	0.285198	0.0997408	[-0.22552737]
1047	1.984	0.1	-20	-5	0	0	1.38667	1.33114	-0.0555296	0.285569	0.320853	12.3558	0.126238	26.2382	1.40071	1.57378	0.123558	0.700357	0.786891	0.123558	-0.0561527	0.285173	0.0997229	[-0.22724486]
1048	1.984	0.1	-20	-4	0	0	1.38667	1.32716	-0.0595103	0.285569	0.323117	13.1487	0.128026	28.0263	1.40071	1.58489	0.131487	0.700357	0.792445	0.131487	-0.0601781	0.285147	0.0997051	[-0.22889312]
1049	1.984	0.1	-20	-3	0	0	1.38667	1.32315	-0.0635191	0.285569	0.325369	13.9373	0.129817	29.8171	1.40071	1.59594	0.139373	0.700357	0.797968	0.139373	-0.0642319	0.285122	0.0996875	[-0.23047167]
1050	1.984	0.1	-20	-2	0	0	1.38667	1.31911	-0.0675549	0.285569	0.327609	14.7215	0.13161	31.6102	1.40071	1.60692	0.147215	0.700357	0.80346	0.147215	-0.0683129	0.285097	0.0996699	[-0.23198001]
1051	1.984	0.1	-20	-1	0	0	1.38667	1.31505	-0.0716163	0.285569	0.329835	15.5012	0.133405	33.4053	1.40071	1.61784	0.155012	0.700357	0.808921	0.155012	-0.0724199	0.285072	0.0996524	[-0.23341768]
1052	1.984	0.1	-20	0	0	0	1.38667	1.31096	-0.0757023	0.285569	0.332049	16.2764	0.135202	35.2019	1.40071	1.6287	0.162764	0.700357	0.81435	0.162764	-0.0765517	0.285047	0.0996351	[-0.23478426]
1053	1.984	0.2	-20	-20	0	0	1.38667	1.38667	0	0.403855	0.403855	0	0.2	0	1.98091	1.98091	0	0.990454	0.990454	0	0	0.403855	0.2	[-0.19454461]
1054	1.984	0.2	-20	-19	0	0	1.38667	1.38325	-0.00341842	0.403855	0.405573	0.425491	0.201706	0.852793	1.98091	1.98934	0.00425491	0.990454	0.994669	0.00425491	-0.00345677	0.403836	0.199981	[-0.19716699]
1055	1.984	0.2	-20	-18	0	0	1.38667	1.37978	-0.00688208	0.403855	0.4073	0.852984	0.203426	1.71324	1.98091	1.99781	0.00852984	0.990454	0.998903	0.00852984	-0.0069593	0.403816	0.199962	[-0.1997293]
1056	1.984	0.2	-20	-17	0	0	1.38667	1.37628	-0.0103899	0.403855	0.409034	1.2823	0.205162	2.58104	1.98091	2.00631	0.012823	0.990454	1.00316	0.012823	-0.0105065	0.403797	0.199942	[-0.20223078]
1057	1.984	0.2	-20	-16	0	0	1.38667	1.37273	-0.0139409	0.403855	0.410774	1.71326	0.206912	3.45587	1.98091	2.01485	0.0171326	0.990454	1.00742	0.0171326	-0.0140973	0.403777	0.199923	[-0.20467065]
1058	1.984	0.2	-20	-15	0	0	1.38667	1.36913	-0.0175339	0.403855	0.412521	2.1457	0.208675	4.33744	1.98091	2.02341	0.021457	0.990454	1.01171	0.021457	-0.0177307	0.403758	0.199904	[-0.20704818]
1059	1.984	0.2	-20	-14	0	0	1.38667	1.3655	-0.0211679	0.403855	0.414272	2.57945	0.210451	5.22543	1.98091	2.03201	0.0257945	0.990454	1.016	0.0257945	-0.0214054	0.403738	0.199884	[-0.20936264]
1060	1.984	0.2	-20	-13	0	0	1.38667	1.36183	-0.0248417	0.403855	0.416029	3.01435	0.212239	6.11956	1.98091	2.04062	0.0301435	0.990454	1.02031	0.0301435	-0.0251204	0.403718	0.199865	[-0.21161332]
1061	1.984	0.2	-20	-12	0	0	1.38667	1.35811	-0.0285542	0.403855	0.417789	3.45023	0.214039	7.01951	1.98091	2.04925	0.0345023	0.990454	1.02463	0.0345023	-0.0288746	0.403699	0.199845	[-0.21379955]
1062	1.984	0.2	-20	-11	0	0	1.38667	1.35436	-0.0323043	0.403855	0.419553	3.88696	0.21585	7.925	1.98091	2.05791	0.0388696	0.990454	1.02895	0.0388696	-0.0326668	0.403679	0.199826	[-0.21592065]
1063	1.984	0.2	-20	-10	0	0	1.38667	1.35058	-0.0360909	0.403855	0.421319	4.32436	0.217671	8.83572	1.98091	2.06657	0.0432436	0.990454	1.03329	0.0432436	-0.0364959	0.403659	0.199806	[-0.21797598]
1064	1.984	0.2	-20	-9	0	0	1.38667	1.34675	-0.0399127	0.403855	0.423088	4.7623	0.219503	9.75139	1.98091	2.07525	0.047623	0.990454	1.03762	0.047623	-0.0403606	0.403639	0.199786	[-0.21996491]
1065	1.984	0.2	-20	-8	0	0	1.38667	1.3429	-0.0437687	0.403855	0.424858	5.20062	0.221343	10.6717	1.98091	2.08393	0.0520062	0.990454	1.04196	0.0520062	-0.0442598	0.403619	0.199767	[-0.22188684]
1066	1.984	0.2	-20	-7	0	0	1.38667	1.33901	-0.0476576	0.403855	0.426629	5.6392	0.223193	11.5964	1.98091	2.09262	0.056392	0.990454	1.04631	0.056392	-0.0481924	0.403599	0.199747	[-0.22374118]
1067	1.984	0.2	-20	-6	0	0	1.38667	1.33509	-0.0515784	0.403855	0.428401	6.07789	0.22505	12.5252	1.98091	2.10131	0.0607789	0.990454	1.05065	0.0607789	-0.0521571	0.40358	0.199727	[-0.22552737]
1068	1.984	0.2	-20	-5	0	0	1.38667	1.33114	-0.0555296	0.403855	0.430172	6.51655	0.226916	13.4578	1.98091	2.11	0.0651655	0.990454	1.055	0.0651655	-0.0561527	0.40356	0.199708	[-0.22724486]
1069	1.984	0.2	-20	-4	0	0	1.38667	1.32716	-0.0595103	0.403855	0.431943	6.95506	0.228788	14.3938	1.98091	2.11868	0.0695506	0.990454	1.05934	0.0695506	-0.0601781	0.40354	0.199688	[-0.22889312]
1070	1.984	0.2	-20	-3	0	0	1.38667	1.32315	-0.0635191	0.403855	0.433713	7.39328	0.230666	15.3332	1.98091	2.12736	0.0739328	0.990454	1.06368	0.0739328	-0.0642319	0.40352	0.199668	[-0.23047167]
1071	1.984	0.2	-20	-2	0	0	1.38667	1.31911	-0.0675549	0.403855	0.435481	7.8311	0.232551	16.2755	1.98091	2.13604	0.078311	0.990454	1.06802	0.078311	-0.0683129	0.4035	0.199649	[-0.23198001]
1072	1.984	0.2	-20	-1	0	0	1.38667	1.31505	-0.0716163	0.403855	0.437247	8.26838	0.234441	17.2204	1.98091	2.1447	0.0826838	0.990454	1.07235	0.0826838	-0.0724199	0.40348	0.199629	[-0.23341768]
1073	1.984	0.2	-20	0	0	0	1.38667	1.31096	-0.0757023	0.403855	0.439011	8.70501	0.236336	18.1678	1.98091	2.15335	0.0870501	0.990454	1.07667	0.0870501	-0.0765517	0.403461	0.199609	[-0.23478426]
1074	1.984	0.3	-20	-20	0	0	1.38667	1.38667	0	0.494619	0.494619	1.1223e-14	0.3	1.85037e-14	2.42611	2.42611	0	1.21305	1.21305	0	0	0.494619	0.3	[-0.19454461]
1075	1.984	0.3	-20	-19	0	0	1.38667	1.38325	-0.00341842	0.494619	0.496024	0.284061	0.301707	0.568929	2.42611	2.433	0.00284061	1.21305	1.2165	0.00284061	-0.00345677	0.494604	0.299981	[-0.19716699]
1076	1.984	0.3	-20	-18	0	0	1.38667	1.37978	-0.00688208	0.494619	0.49744	0.570254	0.303431	1.14376	2.42611	2.43994	0.00570254	1.21305	1.21997	0.00570254	-0.0069593	0.494588	0.299962	[-0.1997293]
1077	1.984	0.3	-20	-17	0	0	1.38667	1.37628	-0.0103899	0.494619	0.498865	0.858458	0.305173	1.72429	2.42611	2.44694	0.00858458	1.21305	1.22347	0.00858458	-0.0105065	0.494572	0.299942	[-0.20223078]
1078	1.984	0.3	-20	-16	0	0	1.38667	1.37273	-0.0139409	0.494619	0.5003	1.14855	0.306931	2.31029	2.42611	2.45397	0.0114855	1.21305	1.22699	0.0114855	-0.0140973	0.494556	0.299923	[-0.20467065]
1079	1.984	0.3	-20	-15	0	0	1.38667	1.36913	-0.0175339	0.494619	0.501744	1.44041	0.308705	2.90157	2.42611	2.46105	0.0144041	1.21305	1.23053	0.0144041	-0.0177307	0.494539	0.299903	[-0.20704818]
1080	1.984	0.3	-20	-14	0	0	1.38667	1.3655	-0.0211679	0.494619	0.503196	1.73393	0.310494	3.49792	2.42611	2.46817	0.0173393	1.21305	1.23409	0.0173393	-0.0214054	0.494523	0.299883	[-0.20936264]
1081	1.984	0.3	-20	-13	0	0	1.38667	1.36183	-0.0248417	0.494619	0.504655	2.02897	0.312297	4.09911	2.42611	2.47533	0.0202897	1.21305	1.23767	0.0202897	-0.0251204	0.494507	0.299863	[-0.21161332]
1082	1.984	0.3	-20	-12	0	0	1.38667	1.35811	-0.0285542	0.494619	0.506121	2.32544	0.314115	4.70496	2.42611	2.48253	0.0232544	1.21305	1.24126	0.0232544	-0.0288746	0.49449	0.299843	[-0.21379955]
1083	1.984	0.3	-20	-11	0	0	1.38667	1.35436	-0.0323043	0.494619	0.507594	2.62321	0.315946	5.31524	2.42611	2.48975	0.0262321	1.21305	1.24487	0.0262321	-0.0326668	0.494474	0.299823	[-0.21592065]
1084	1.984	0.3	-20	-10	0	0	1.38667	1.35058	-0.0360909	0.494619	0.509073	2.92218	0.317789	5.92975	2.42611	2.497	0.0292218	1.21305	1.2485	0.0292218	-0.0364959	0.494457	0.299803	[-0.21797598]
1085	1.984	0.3	-20	-9	0	0	1.38667	1.34675	-0.0399127	0.494619	0.510557	3.22223	0.319645	6.54829	2.42611	2.50428	0.0322223	1.21305	1.25214	0.0322223	-0.0403606	0.494441	0.299783	[-0.21996491]
1086	1.984	0.3	-20	-8	0	0	1.38667	1.3429	-0.0437687	0.494619	0.512046	3.52326	0.321512	7.17065	2.42611	2.51159	0.0352326	1.21305	1.25579	0.0352326	-0.0442598	0.494424	0.299763	[-0.22188684]
1087	1.984	0.3	-20	-7	0	0	1.38667	1.33901	-0.0476576	0.494619	0.513539	3.82515	0.32339	7.79662	2.42611	2.51891	0.0382515	1.21305	1.25946	0.0382515	-0.0481924	0.494407	0.299743	[-0.22374118]
1088	1.984	0.3	-20	-6	0	0	1.38667	1.33509	-0.0515784	0.494619	0.515036	4.12781	0.325278	8.426	2.42611	2.52625	0.0412781	1.21305	1.26313	0.0412781	-0.0521571	0.49439	0.299722	[-0.22552737]
1089	1.984	0.3	-20	-5	0	0	1.38667	1.33114	-0.0555296	0.494619	0.516537	4.43112	0.327176	9.05859	2.42611	2.53361	0.0443112	1.21305	1.26681	0.0443112	-0.0561527	0.494373	0.299702	[-0.22724486]
1090	1.984	0.3	-20	-4	0	0	1.38667	1.32716	-0.0595103	0.494619	0.51804	4.73499	0.329083	9.69418	2.42611	2.54098	0.0473499	1.21305	1.27049	0.0473499	-0.0601781	0.494357	0.299681	[-0.22889312]
1091	1.984	0.3	-20	-3	0	0	1.38667	1.32315	-0.0635191	0.494619	0.519545	5.03931	0.330998	10.3326	2.42611	2.54837	0.0503931	1.21305	1.27418	0.0503931	-0.0642319	0.49434	0.299661	[-0.23047167]
1092	1.984	0.3	-20	-2	0	0	1.38667	1.31911	-0.0675549	0.494619	0.521052	5.34399	0.332921	10.9736	2.42611	2.55576	0.0534399	1.21305	1.27788	0.0534399	-0.0683129	0.494323	0.29964	[-0.23198001]
1093	1.984	0.3	-20	-1	0	0	1.38667	1.31505	-0.0716163	0.494619	0.52256	5.64892	0.334851	11.617	2.42611	2.56316	0.0564892	1.21305	1.28158	0.0564892	-0.0724199	0.494306	0.29962	[-0.23341768]
1094	1.984	0.3	-20	0	0	0	1.38667	1.31096	-0.0757023	0.494619	0.524069	5.95402	0.336788	12.2625	2.42611	2.57056	0.0595402	1.21305	1.28528	0.0595402	-0.0765517	0.494289	0.299599	[-0.23478426]
1095	1.984	0.4	-20	-20	0	0	1.38667	1.38667	0	0.571137	0.571137	0	0.4	-1.38778e-14	2.80143	2.80143	0	1.40071	1.40071	0	0	0.571137	0.4	[-0.19454461]
1096	1.984	0.4	-20	-19	0	0	1.38667	1.38325	-0.00341842	0.571137	0.572355	0.213196	0.401707	0.426847	2.80143	2.8074	0.00213196	1.40071	1.4037	0.00213196	-0.00345677	0.571124	0.399981	[-0.19716699]
1097	1.984	0.4	-20	-18	0	0	1.38667	1.37978	-0.00688208	0.571137	0.573583	0.428295	0.403434	0.858425	2.80143	2.81343	0.00428295	1.40071	1.40671	0.00428295	-0.0069593	0.57111	0.399962	[-0.1997293]
1098	1.984	0.4	-20	-17	0	0	1.38667	1.37628	-0.0103899	0.571137	0.574822	0.645208	0.405178	1.29458	2.80143	2.8195	0.00645208	1.40071	1.40975	0.00645208	-0.0105065	0.571096	0.399942	[-0.20223078]
1099	1.984	0.4	-20	-16	0	0	1.38667	1.37273	-0.0139409	0.571137	0.576071	0.863844	0.406941	1.73515	2.80143	2.82563	0.00863844	1.40071	1.41281	0.00863844	-0.0140973	0.571082	0.399922	[-0.20467065]
1100	1.984	0.4	-20	-15	0	0	1.38667	1.36913	-0.0175339	0.571137	0.577329	1.08412	0.40872	2.17999	2.80143	2.8318	0.0108412	1.40071	1.4159	0.0108412	-0.0177307	0.571068	0.399903	[-0.20704818]
1101	1.984	0.4	-20	-14	0	0	1.38667	1.3655	-0.0211679	0.571137	0.578596	1.30594	0.410516	2.62893	2.80143	2.83801	0.0130594	1.40071	1.41901	0.0130594	-0.0214054	0.571054	0.399883	[-0.20936264]
1102	1.984	0.4	-20	-13	0	0	1.38667	1.36183	-0.0248417	0.571137	0.579871	1.52922	0.412327	3.08183	2.80143	2.84427	0.0152922	1.40071	1.42213	0.0152922	-0.0251204	0.571039	0.399863	[-0.21161332]
1103	1.984	0.4	-20	-12	0	0	1.38667	1.35811	-0.0285542	0.571137	0.581154	1.75388	0.414154	3.53851	2.80143	2.85056	0.0175388	1.40071	1.42528	0.0175388	-0.0288746	0.571025	0.399843	[-0.21379955]
1104	1.984	0.4	-20	-11	0	0	1.38667	1.35436	-0.0323043	0.571137	0.582445	1.97982	0.415995	3.99884	2.80143	2.85689	0.0197982	1.40071	1.42845	0.0197982	-0.0326668	0.57101	0.399822	[-0.21592065]
1105	1.984	0.4	-20	-10	0	0	1.38667	1.35058	-0.0360909	0.571137	0.583742	2.20697	0.417851	4.46265	2.80143	2.86325	0.0220697	1.40071	1.43163	0.0220697	-0.0364959	0.570996	0.399802	[-0.21797598]
1106	1.984	0.4	-20	-9	0	0	1.38667	1.34675	-0.0399127	0.571137	0.585046	2.43524	0.419719	4.92979	2.80143	2.86965	0.0243524	1.40071	1.43482	0.0243524	-0.0403606	0.570981	0.399781	[-0.21996491]
1107	1.984	0.4	-20	-8	0	0	1.38667	1.3429	-0.0437687	0.571137	0.586355	2.66455	0.4216	5.40009	2.80143	2.87607	0.0266455	1.40071	1.43804	0.0266455	-0.0442598	0.570966	0.399761	[-0.22188684]
1108	1.984	0.4	-20	-7	0	0	1.38667	1.33901	-0.0476576	0.571137	0.587671	2.8948	0.423494	5.87341	2.80143	2.88252	0.028948	1.40071	1.44126	0.028948	-0.0481924	0.570952	0.39974	[-0.22374118]
1109	1.984	0.4	-20	-6	0	0	1.38667	1.33509	-0.0515784	0.571137	0.588991	3.12593	0.425398	6.34958	2.80143	2.889	0.0312593	1.40071	1.4445	0.0312593	-0.0521571	0.570937	0.399719	[-0.22552737]
1110	1.984	0.4	-20	-5	0	0	1.38667	1.33114	-0.0555296	0.571137	0.590315	3.35785	0.427314	6.82845	2.80143	2.8955	0.0335785	1.40071	1.44775	0.0335785	-0.0561527	0.570922	0.399699	[-0.22724486]
1111	1.984	0.4	-20	-4	0	0	1.38667	1.32716	-0.0595103	0.571137	0.591644	3.59048	0.429239	7.30987	2.80143	2.90201	0.0359048	1.40071	1.45101	0.0359048	-0.0601781	0.570907	0.399678	[-0.22889312]
1112	1.984	0.4	-20	-3	0	0	1.38667	1.32315	-0.0635191	0.571137	0.592976	3.82373	0.431175	7.79368	2.80143	2.90855	0.0382373	1.40071	1.45427	0.0382373	-0.0642319	0.570892	0.399657	[-0.23047167]
1113	1.984	0.4	-20	-2	0	0	1.38667	1.31911	-0.0675549	0.571137	0.594311	4.05754	0.433119	8.27972	2.80143	2.9151	0.0405754	1.40071	1.45755	0.0405754	-0.0683129	0.570877	0.399636	[-0.23198001]
1114	1.984	0.4	-20	-1	0	0	1.38667	1.31505	-0.0716163	0.571137	0.595649	4.29182	0.435071	8.76784	2.80143	2.92166	0.0429182	1.40071	1.46083	0.0429182	-0.0724199	0.570862	0.399615	[-0.23341768]
1115	1.984	0.4	-20	0	0	0	1.38667	1.31096	-0.0757023	0.571137	0.59699	4.5265	0.437032	9.25789	2.80143	2.92823	0.045265	1.40071	1.46412	0.045265	-0.0765517	0.570847	0.399594	[-0.23478426]
